# Supplementary material for: Mechanism and origin of regioselectivity in Rh-catalyzed desymmetric [2 + 2 + 2] cycloaddition: charge versus π–π stacking interaction
Source: Royal Society of Chemistry journal article supplement (doi:10.1039/d2qo00682k), 2022-01-01
Supplement: d2qo00682k1.pdf [file d2qo00682k1.pdf]

*Electronic Supplementary Information*  
*for*

**Mechanism and Origin of Regioselectivity in Rh-Catalyzed Desymmetric  
[2+2+2] Cycloaddition: Charge versus  $\pi$ - $\pi$  Stacking Interaction**

Boming Shen,<sup>a</sup> Yu Chen,<sup>a</sup> and Peiyuan Yu<sup>\*,a</sup>

*<sup>a</sup> Department of Chemistry and Shenzhen Grubbs Institute, Guangdong Provincial Key  
Laboratory of Catalysis, Southern University of Science and Technology, Shenzhen  
518055, China*

**Table of Content**

|                                                                                                                        |           |
|------------------------------------------------------------------------------------------------------------------------|-----------|
| <b>1. Calculated the thermodynamic stability of cationic Rh(I) species relative to the neutral Rh(I) species.....</b>  | <b>S2</b> |
| <b>2. Comparison of different configurations of 3-ts, 3'-ts, 9-ts and 14-ts.....</b>                                   | <b>S3</b> |
| <b>3. Calculated energies barrier differences of key transition states with various density functionals.....</b>       | <b>S4</b> |
| <b>4. B3LYP-D3(BJ) and M06-D3 calculated absolute energies of all structures.....</b>                                  | <b>S5</b> |
| <b>5. Cartesian coordinates for DFT-optimized structures for all the optimized compounds and transition state.....</b> | <b>S6</b> |

## 1. Calculated the thermodynamic stability of cationic Rh(I) species, relative to the neutral Rh(I) species.

we have calculated the thermodynamic stability of cationic Rh(I) species relative to the precursor Rh(cod)2BF<sub>4</sub>. As shown in Fig. S1, Neutral Rh(cod)2BF<sub>4</sub> species can undergo ligand exchange with the (S)-BINAP ligand to afford a cationic Rh(I) species 1 with dissociation of the anionic BF<sub>4</sub>, which is exergonic by 22.0 kcal/mol. DFT calculation indicates that cationic Rh(I) species 1 is thermodynamically more favored than neutral Rh(cod)2BF<sub>4</sub> species. Therefore, the cationic Rh(I) species 1 was used as starting point for catalytic cycle.

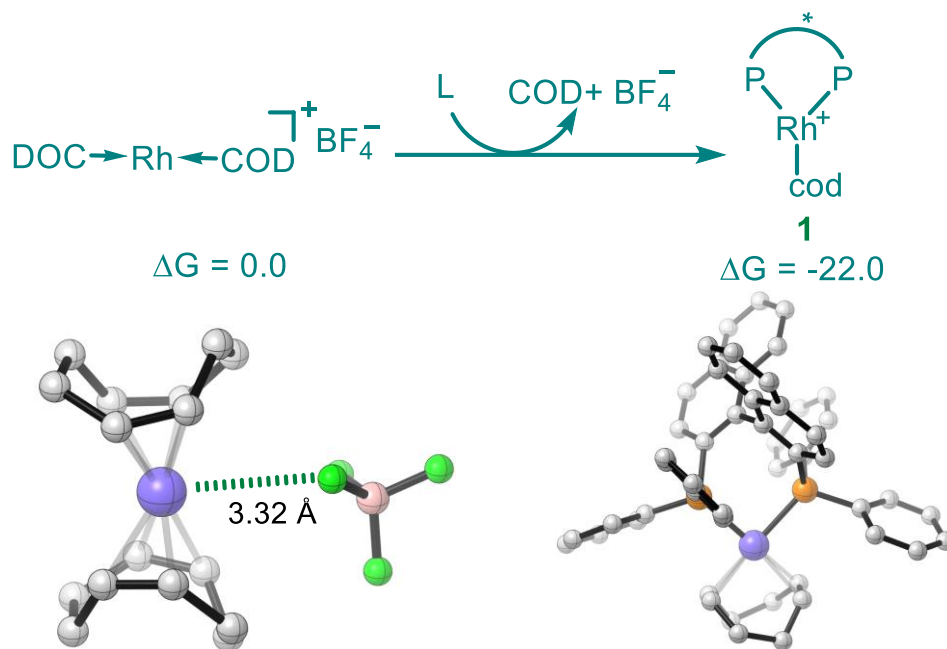

**Fig. S1:** The values given by kcal/mol are the relative free energies calculated by M06-D3/6-311+G(d,p)/SMD(dichloroethane)//B3LYP-D3(bj)/6-31G(d)/SMD(dichloroethane) (LANL08(f) for Rh) method.

## 2. Comparison of different configurations of 3-ts, 3'-ts, 9-ts and 14-ts

The exploration of conformers and isomers are indeed important, especially for the investigation of selectivity-related problems. We have considered various conformations for the key transition states to ensure that they represent the corresponding lowest energy conformations. For example, by rotating the dihedral angle of the phenyl substituents on the catalyst, initial conformational structures were searched and optimized for the enantio- and regioselectivity-controlling transition states **3-ts**, **3'-ts**, **9-ts** and **14-ts**.

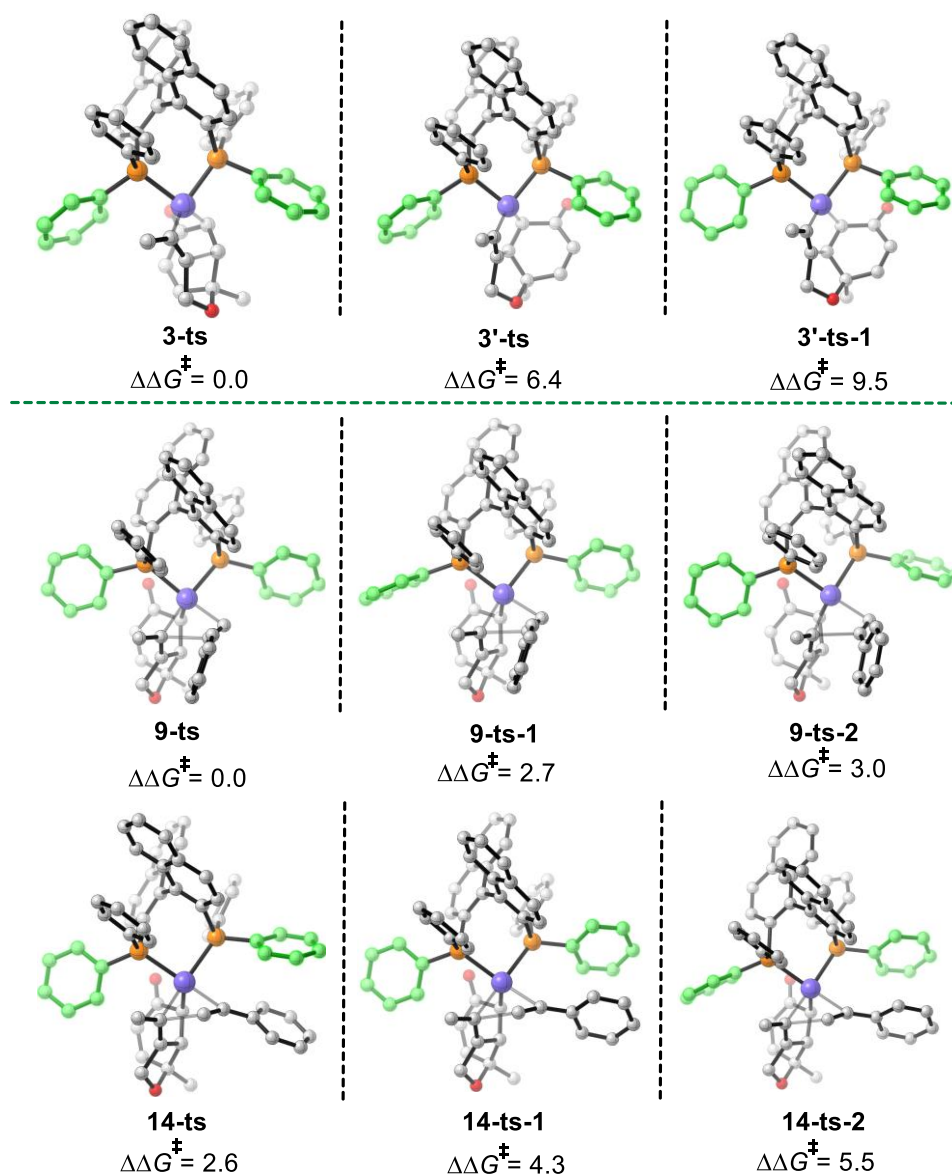

**Fig. S2:** Different configurations of the transition states transition states **3-ts**, **3'-ts**, **9-ts** and **14-ts**. Values are given in kcal/mol.

### 3. Calculated energies barrier differences of key transition states with various density functionals

we tried using various density functionals to calculate the energy barrier differences ( $\Delta\Delta G$ ) for key enantio- and regioselectivity-controlling transition states. As shown in Table S1, based on the optimized geometrical structures in the solution phase, the calculated solvation single-point energy barrier differences ( $\Delta\Delta G$ ) showed small differences between each other. Therefore, the reported energy data is reliable.

**Table S1.** The calculated energy barrier differences ( $\Delta\Delta G$ ) in key transition states determined enantio- and regioselectivity by using various density functionals in dichloroethane. Values are given in kcal/mol.

| Energy<br>Functionals           | $\Delta\Delta G$<br>( $\Delta G_{3'-ts} - \Delta G_{3-ts}$ ) | $\Delta\Delta G$<br>( $\Delta G_{14-ts} - \Delta G_{9-ts}$ ) | $\Delta\Delta G$<br>( $\Delta G_{TS2-CN} - \Delta G_{TS1-CN}$ ) |
|---------------------------------|--------------------------------------------------------------|--------------------------------------------------------------|-----------------------------------------------------------------|
| <b>M06-D3</b>                   | 6.4                                                          | 2.6                                                          | -0.8                                                            |
| <b>M06</b>                      | 6.4                                                          | 2.9                                                          | -0.5                                                            |
| <b>M06L</b>                     | 5.8                                                          | 2.3                                                          | -1.1                                                            |
| <b><math>\omega</math>B97XD</b> | 6.2                                                          | 3.5                                                          | -0.9                                                            |
| <b>M11L</b>                     | 6.0                                                          | 3.1                                                          | -0.6                                                            |

**4.SMD(dichloroethane)/M06-D3/6-311+G(d,p)//SMD(dichloroethane)/B3LYP-D3(BJ)/6-31G(d) (LANL08(f) basis set for Rh atom) calculated absolute energies of all structures.**

**Table S2.** SMD(dichloroethane)/M06-D3/6-311+G(d,p)//SMD(dichloroethane)/B3LYP-D3(BJ)/6-31G(d) (LANL08(f) basis set for Rh atom) calculated absolute energies of all structures. Values are given in Hartree.

| Geometry                                 | E <sub>(elec-B3-LYP-D3BJ)</sub> <sup>1</sup> | H <sub>(corr-B3-LYP-D3BJ)</sub> <sup>2</sup> | G <sub>(corr-B3-LYP-D3BJ)</sub> <sup>3</sup> | E <sub>(solv-M06-D3)</sub> <sup>4</sup> | IF <sup>5</sup> |
|------------------------------------------|----------------------------------------------|----------------------------------------------|----------------------------------------------|-----------------------------------------|-----------------|
| <b>Rh(cod)<sub>2</sub>BF<sub>4</sub></b> | -1158.243075                                 | 0.407571                                     | 0.332553                                     | -1157.815142                            | -               |
| <b>(S)-BINAP</b>                         | -2378.924863                                 | 0.661812                                     | 0.552146                                     | -2377.810506                            | -               |
| <b>BF<sub>4</sub><sup>-</sup></b>        | -424.585560                                  | 0.019724                                     | -0.013174                                    | -424.615059                             | -               |
| <b>1</b>                                 | -2800.535645                                 | 0.859011                                     | 0.733899                                     | -2799.1666                              | -               |
| <b>1a</b>                                | -576.782914                                  | 0.215908                                     | 0.162156                                     | -576.50943                              | -               |
| <b>COD</b>                               | -312.067812                                  | 0.189477                                     | 0.149693                                     | -311.864837                             | -               |
| <b>2</b>                                 | -3065.241549                                 | 0.886230                                     | 0.749717                                     | -3063.78866                             | -               |
| <b>3-ts</b>                              | -3065.232588                                 | 0.885178                                     | 0.752063                                     | -3063.77858                             | 199.79i         |
| <b>4</b>                                 | -3065.277191                                 | 0.886288                                     | 0.757764                                     | -3063.812443                            | -               |
| <b>3'-ts</b>                             | -3065.223126                                 | 0.885405                                     | 0.754129                                     | -3063.770514                            | 174.23i         |
| <b>3'-ts-1</b>                           | -3065.219448                                 | 0.885230                                     | 0.753669                                     | -3063.765144                            | 147.16i         |
| <b>4'</b>                                | -3065.265146                                 | 0.885937                                     | 0.757444                                     | -3063.801523                            | -               |
| <b>5-ts</b>                              | -3065.176806                                 | 0.883831                                     | 0.750461                                     | -3063.715065                            | 268.29i         |
| <b>1b</b>                                | -308.421894                                  | 0.117083                                     | 0.07925                                      | -308.233925                             | -               |
| <b>6</b>                                 | -3373.685909                                 | 1.006913                                     | 0.854227                                     | -3372.048248                            | -               |
| <b>7-ts</b>                              | -3373.659126                                 | 1.004422                                     | 0.851103                                     | -3372.006726                            | 294.68i         |
| <b>8</b>                                 | -3373.709748                                 | 1.006809                                     | 0.858972                                     | -3372.051655                            | -               |
| <b>9-ts</b>                              | -3373.702155                                 | 1.006212                                     | 0.861339                                     | -3372.041721                            | 254.33i         |
| <b>9-ts-1</b>                            | -3373.696173                                 | 1.005943                                     | 0.859562                                     | -3372.035699                            | 223.42i         |
| <b>9-ts-2</b>                            | -3373.695088                                 | 1.005840                                     | 0.859726                                     | -3372.035264                            | 242.25i         |
| <b>10</b>                                | -3373.780081                                 | 1.010642                                     | 0.864422                                     | -3372.119567                            | -               |
| <b>11-ts</b>                             | -3373.754666                                 | 1.008206                                     | 0.864260                                     | -3372.105262                            | 295.83i         |
| <b>12</b>                                | -3373.821621                                 | 1.011786                                     | 0.867006                                     | -3372.176721                            | -               |
| <b>13</b>                                | -885.359844                                  | 0.340982                                     | 0.277294                                     | -884.881369                             | -               |
| <b>14-ts</b>                             | -3373.693627                                 | 1.006206                                     | 0.860961                                     | -3372.037195                            | 331.75i         |
| <b>14-ts-1</b>                           | -3373.694534                                 | 1.006614                                     | 0.863731                                     | -3372.037227                            | 105.49i         |
| <b>14-ts-2</b>                           | -3373.689506                                 | 1.006824                                     | 0.862348                                     | -3372.033940                            | 131.12i         |
| <b>15</b>                                | -3373.776533                                 | 1.010249                                     | 0.865796                                     | -3372.115042                            | -               |
| <b>16-ts</b>                             | -3373.745912                                 | 1.007547                                     | 0.862116                                     | -3372.097353                            | 286.53i         |
| <b>17</b>                                | -3373.813782                                 | 1.010899                                     | 0.865008                                     | -3372.170522                            | -               |
| <b>18</b>                                | -885.363543                                  | 0.341028                                     | 0.277403                                     | -884.884846                             | -               |
| <b>1c</b>                                | -387.237259                                  | 0.192624                                     | 0.141120                                     | -387.027541                             | -               |
| <b>1d</b>                                | -155.994927                                  | 0.091227                                     | 0.056469                                     | -155.897719                             | -               |
| <b>6-a</b>                               | -2952.884660                                 | 0.879454                                     | 0.740089                                     | -2951.428937                            | -               |

|                           |              |          |          |              |                 |
|---------------------------|--------------|----------|----------|--------------|-----------------|
| <b>7-a-ts</b>             | -2952.854762 | 0.879211 | 0.746291 | -2951.384067 | 292.75 <i>i</i> |
| <b>1e</b>                 | -157.241845  | 0.114899 | 0.080695 | -157.133205  | -               |
| <b>2-a</b>                | -2875.685060 | 0.862626 | 0.731958 | -2874.308481 | -               |
| <b>3-a-ts</b>             | -2875.671341 | 0.860755 | 0.731191 | -2874.294256 | 222.43 <i>i</i> |
| <b>2-b</b>                | -2801.691438 | 0.877720 | 0.743760 | -2800.324656 | -               |
| <b>3-b-ts</b>             | -2801.656782 | 0.876415 | 0.745305 | -2800.280211 | 261.81 <i>i</i> |
| <b>TS1-OMe</b>            | -3488.233952 | 1.041068 | 0.889194 | -3486.538856 | 259.08 <i>i</i> |
| <b>TS2-OMe</b>            | -3488.223533 | 1.041122 | 0.889353 | -3486.534780 | 377.61 <i>i</i> |
| <b>TS1- Nap</b>           | -3527.366733 | 1.054906 | 0.902529 | -3525.607536 | 231.64 <i>i</i> |
| <b>TS2- Nap</b>           | -3527.357207 | 1.055900 | 0.905518 | -3525.602288 | 374.16 <i>i</i> |
| <b>TS1-Me</b>             | -3413.026385 | 1.034714 | 0.884529 | -3411.338696 | 233.66 <i>i</i> |
| <b>TS2-Me</b>             | -3413.017548 | 1.036186 | 0.887867 | -3411.333970 | 341.13 <i>i</i> |
| <b>TS1-Br</b>             | -5944.510477 | 0.996747 | 0.845527 | -5945.461959 | 218.87 <i>i</i> |
| <b>TS2-Br</b>             | -5944.503975 | 0.997662 | 0.847741 | -5945.459616 | 361.20 <i>i</i> |
| <b>TS1-Cl</b>             | -3833.298059 | 0.996927 | 0.847695 | -3831.636169 | 219.89 <i>i</i> |
| <b>TS2-Cl</b>             | -3833.291137 | 0.997295 | 0.847667 | -3831.633960 | 374.64 <i>i</i> |
| <b>TS1-F</b>              | -3472.934157 | 0.998348 | 0.850907 | -3471.282637 | 223.27 <i>i</i> |
| <b>TS2-F</b>              | -3472.925642 | 0.998228 | 0.849754 | -3471.279749 | 377.69 <i>i</i> |
| <b>TS1-CN</b>             | -3465.947689 | 1.005594 | 0.859395 | -3464.253079 | 222.84 <i>i</i> |
| <b>TS2-CN</b>             | -3465.942394 | 1.006389 | 0.857122 | -3464.252140 | 359.49 <i>i</i> |
| <b>TS1-COOMe</b>          | -3601.589705 | 1.053088 | 0.896554 | -3599.868874 | 217.76 <i>i</i> |
| <b>TS2-COOMe</b>          | -3601.584000 | 1.052929 | 0.894837 | -3599.867995 | 394.92 <i>i</i> |
| <b>TS1-CF<sub>3</sub></b> | -3710.740203 | 1.013966 | 0.859302 | -3709.075779 | 203.61 <i>i</i> |
| <b>TS2-CF<sub>3</sub></b> | -3710.734246 | 1.013646 | 0.857977 | -3709.074731 | 363.56 <i>i</i> |

<sup>1</sup>The electronic energy calculated by B3LYP-D3(BJ) in solution phase. <sup>2</sup>The thermal correction to enthalpy calculated by B3LYP-D3(BJ) in solution phase. <sup>3</sup>The thermal correction to Gibbs free energy calculated by B3LYP-D3(BJ) in solution phase. <sup>4</sup>The electronic energy calculated by M06-D3 in dichloroethane solvent. <sup>5</sup>The B3LYP-D3(BJ) calculated imaginary frequencies for the transition states.

## 5. Cartesian coordinates for DFT-optimized structures for all the optimized compounds and transition states

### Rh(cod)<sub>2</sub>BF<sub>4</sub>

|    |            |            |             |
|----|------------|------------|-------------|
| C  | 7.07514400 | 1.99653900 | -1.45535900 |
| C  | 8.46871000 | 2.48592600 | -1.13916800 |
| C  | 8.72323600 | 3.95537600 | -1.53073000 |
| C  | 7.53950200 | 4.86771400 | -1.25791500 |
| C  | 6.54103900 | 5.19608500 | -2.16591500 |
| C  | 6.39849800 | 4.66743700 | -3.57514000 |
| C  | 6.76140900 | 3.17516200 | -3.73302400 |
| C  | 6.31407500 | 2.32825900 | -2.55862700 |
| H  | 7.64379700 | 5.50065900 | -0.38127100 |
| H  | 5.96123400 | 6.09494600 | -1.95886300 |
| H  | 7.00597000 | 5.27237700 | -4.26474900 |
| H  | 5.35613400 | 4.79510100 | -3.87481300 |
| H  | 6.25141600 | 2.80053400 | -4.62319300 |
| H  | 7.83466900 | 3.04827900 | -3.89298400 |
| H  | 5.38407500 | 1.78448000 | -2.70595500 |
| H  | 6.75328400 | 1.13536400 | -0.87491100 |
| H  | 9.21082500 | 1.83441900 | -1.62452800 |
| H  | 8.62094600 | 2.37242800 | -0.06004900 |
| H  | 9.57857400 | 4.32334200 | -0.95488700 |
| H  | 9.00547900 | 4.02712600 | -2.58374000 |
| Rh | 5.65137000 | 3.65478700 | -0.82266700 |
| C  | 5.18842300 | 5.26607800 | 0.70458300  |
| C  | 5.55782100 | 4.70004500 | 2.05557700  |
| C  | 5.10064200 | 3.24508300 | 2.27507100  |
| C  | 5.27268500 | 2.37169000 | 1.04553500  |
| C  | 4.29363600 | 2.12706800 | 0.09547400  |
| C  | 2.90304200 | 2.72031400 | 0.07156700  |
| C  | 2.83684800 | 4.21493500 | 0.45825000  |
| C  | 4.03171600 | 5.02229100 | -0.01171400 |
| H  | 6.13238400 | 1.70824700 | 1.06687000  |
| H  | 4.42251100 | 1.25691500 | -0.54585900 |
| H  | 2.24002100 | 2.14081600 | 0.73097200  |
| H  | 2.52752100 | 2.59977300 | -0.94444400 |
| H  | 1.93978900 | 4.64616500 | 0.00370600  |
| H  | 2.72570000 | 4.32952700 | 1.53975500  |
| H  | 3.86148600 | 5.63948500 | -0.89081100 |
| H  | 5.78662300 | 6.11886400 | 0.39331000  |
| H  | 5.15457800 | 5.34523500 | 2.85058100  |
| H  | 6.64885700 | 4.74854100 | 2.14489600  |
| H  | 5.69209800 | 2.81427200 | 3.08946900  |
| H  | 4.05788900 | 3.21732100 | 2.60049600  |
| B  | 2.91273300 | 2.97531800 | -3.78290300 |
| F  | 3.16107300 | 1.77783200 | -3.07094900 |
| F  | 1.60118800 | 2.97510500 | -4.26390500 |
| F  | 3.82225300 | 3.07712800 | -4.84957900 |
| F  | 3.09573800 | 4.07267000 | -2.90736700 |

### (S)-BINAP

|   |             |             |             |
|---|-------------|-------------|-------------|
| P | -3.59749800 | -3.28081300 | 0.21753000  |
| P | -3.59607100 | 0.37242100  | -0.98395100 |
| C | -4.67477000 | 1.43691600  | -2.03518200 |
| C | -4.66134300 | 1.21667500  | -3.41909900 |
| C | -6.51854800 | -0.67078000 | 2.53354500  |
| C | -4.75941200 | 0.00330700  | 0.41405000  |
| C | -8.27550400 | -0.81283600 | -4.20272100 |
| C | -6.52208400 | -2.23397400 | -3.29715900 |
| C | -6.35600600 | 2.91293000  | -3.73109900 |
| C | -2.43728600 | -4.47781700 | -0.56704500 |
| C | -2.34823600 | 2.92484700  | -0.53609100 |
| C | -2.35487200 | -5.83574300 | -0.23040200 |
| C | -2.43264100 | 1.56686000  | -0.20016000 |
| C | -0.50591700 | -6.13437000 | -1.76805100 |
| C | -4.67653800 | -4.34269300 | 1.27101400  |
| C | -1.52490200 | -3.95641800 | -1.50271800 |
| C | -4.76209400 | -2.91052200 | -1.17913700 |
| C | -5.65043100 | -1.05631600 | 0.25341300  |
| C | -4.74826000 | 0.73027300  | 1.63466000  |
| C | -8.31949100 | -2.80983800 | 2.22116900  |
| C | -6.55788100 | -1.40325000 | 1.30300300  |
| C | -0.56896600 | 1.86406700  | 1.33752000  |
| C | -7.48676800 | -2.47338000 | 1.17848900  |
| C | -6.37767600 | -6.04728700 | 1.59163700  |
| C | -1.38380300 | 3.74373800  | 0.05838300  |
| C | -5.59858000 | 0.40054600  | 2.66418200  |
| C | -8.31940900 | -0.09206600 | -2.98345900 |
| C | -7.39775600 | -1.86232700 | -4.35274600 |
| C | -5.54274700 | 2.40746000  | -1.50917000 |
| C | -5.49916600 | 1.94842400  | -4.26371500 |
| C | -6.37416600 | 3.14395700  | -2.35209800 |
| C | -4.75316700 | -3.63764400 | -2.39966900 |
| C | -5.60389700 | -3.30674300 | -3.42847300 |
| C | -6.55931300 | -1.50141700 | -2.06660100 |
| C | -6.35781900 | -5.81470100 | 2.97035100  |
| C | -1.39262300 | -6.65669700 | -0.82556900 |
| C | -5.54624300 | -5.31276300 | 0.74700400  |
| C | -7.39399100 | -1.04107200 | 3.58979800  |
| C | -5.65150200 | -1.84965200 | -1.01774900 |
| C | -0.49685400 | 3.21927200  | 0.99944800  |
| C | -1.52002600 | 1.04329100  | 0.73406500  |
| C | -4.66142800 | -4.12086500 | 2.65466900  |
| C | -8.27352700 | -2.08915700 | 3.44040600  |
| C | -7.48645200 | -0.42984900 | -1.94139200 |
| C | -0.57604700 | -4.77924000 | -2.10685200 |
| C | -5.49928200 | -4.85060900 | 3.50098700  |
| H | -4.00794200 | 0.45359700  | -3.83343700 |
| H | -8.93740300 | -0.53305400 | -5.01741600 |
| H | -3.03608500 | 3.34874400  | -1.25995300 |
| H | -3.04257700 | -6.25798600 | 0.49456700  |

|   |             |             |             |   |             |             |             |
|---|-------------|-------------|-------------|---|-------------|-------------|-------------|
| H | -1.56687800 | -2.90107300 | -1.76334600 | C | 0.98283200  | 4.42098400  | 0.33989500  |
| H | -4.05297000 | 1.55298000  | 1.75715300  | C | 0.98575900  | -4.43985200 | -0.14557700 |
| H | -9.01333100 | -3.63822100 | 2.11274200  | C | 0.96080600  | 3.19842900  | 1.02563200  |
| H | 0.12079500  | 1.44575400  | 2.06557500  | C | 1.98931300  | -5.64727400 | -1.99065200 |
| H | -7.51975500 | -3.03509600 | 0.25242800  | C | -0.27308500 | -2.12955800 | 1.45541200  |
| H | -7.04771300 | -6.79449900 | 1.17496200  | C | 1.48206800  | -3.29325500 | -2.21132100 |
| H | -1.33144800 | 4.79477400  | -0.21312900 | C | -1.09963500 | -1.17735800 | -1.19660200 |
| H | -5.57616900 | 0.96179800  | 3.59501700  | C | -2.03203700 | 0.22502300  | 0.70287600  |
| H | -9.01185300 | 0.73741600  | -2.87452200 | C | -1.28142500 | 1.62490400  | 2.54110700  |
| H | -7.35766200 | -2.42355200 | -5.28286100 | C | -4.95249400 | -1.79349800 | 1.93492300  |
| H | -5.57355800 | 2.57955500  | -0.43744700 | C | -3.06790200 | -0.29891600 | 1.54622100  |
| H | -5.48841400 | 1.75824300  | -5.33321400 | C | 2.00415000  | 4.29181000  | 2.93550900  |
| H | -7.04286200 | 3.89150600  | -1.93387700 | C | -3.99929400 | -1.27239900 | 1.08871900  |
| H | -4.05920200 | -4.46138600 | -2.52271700 | C | -1.81154300 | -3.36235300 | 2.86341400  |
| H | -5.58314300 | -3.86812100 | -4.35927200 | C | 1.50362600  | 5.56593000  | 0.94806300  |
| H | -1.34179600 | -7.70765900 | -0.55348400 | C | -2.25738000 | 1.12423000  | 3.36602400  |
| H | -5.57834800 | -5.48606200 | -0.32449200 | C | -4.89397400 | 1.78730600  | -2.03201900 |
| H | -7.35228000 | -0.47995100 | 4.51990500  | C | -4.04029500 | 0.42025600  | -3.83251600 |
| H | -1.56356100 | -0.01213100 | 0.99413500  | C | -1.32107400 | 3.07849200  | -1.53177400 |
| H | -4.00663800 | -3.35813800 | 3.06745400  | C | -0.13930000 | 1.97956600  | -3.81577600 |
| H | -8.93525200 | -2.36791000 | 4.25559300  | C | -1.77894300 | 3.44059200  | -2.79738100 |
| H | -7.51788800 | 0.13191700  | -1.01530800 | C | -1.21502500 | -1.63833400 | -2.53680200 |
| H | 0.11356100  | -4.36258300 | -2.83599900 | C | -2.16408600 | -1.13237000 | -3.38942200 |
| H | -5.48723200 | -4.65919100 | 4.57025000  | C | -3.01990000 | 0.29301300  | -1.59323800 |
| H | -7.01247800 | 3.47930000  | -4.38589800 | C | -1.22039700 | -2.80351400 | 3.99965600  |
| H | 0.24919500  | 3.85854200  | 1.46327000  | C | 1.49831800  | -5.62171100 | -0.68542900 |
| H | -7.01432300 | -6.37951300 | 3.62646300  | C | -1.34552300 | -3.02301300 | 1.59484800  |
| H | 0.23842400  | -6.77524300 | -2.23240500 | C | -4.14764800 | -0.42526200 | 3.75714300  |

#### BF<sub>4</sub>

|   |             |             |             |
|---|-------------|-------------|-------------|
| B | 0.00000300  | -0.00004100 | 0.00003700  |
| F | -1.23617800 | -0.41857200 | 0.52499900  |
| F | 1.03049400  | -0.34678700 | 0.89257800  |
| F | -0.01492700 | 1.39499700  | -0.17903900 |
| F | 0.22058400  | -0.62958500 | -1.23853300 |

#### 1

|    |             |             |             |   |             |             |             |
|----|-------------|-------------|-------------|---|-------------|-------------|-------------|
| Rh | 2.04260500  | 0.00157600  | -0.02731300 | C | 2.00752800  | 5.50773600  | 2.24716900  |
| P  | 0.37440400  | -1.66589900 | -0.18854500 | C | 1.49886700  | 3.14495700  | 2.32553600  |
| P  | 0.36436600  | 1.64890800  | 0.23240600  | C | 0.32457000  | -1.58198500 | 2.59830900  |
| C  | -0.26162800 | 2.16878800  | -1.40232900 | C | -5.02738600 | -1.37206600 | 3.28409000  |
| C  | 0.32947700  | 1.62505500  | -2.55104300 | C | -3.96253700 | 1.26735900  | -1.16123800 |
| C  | -3.15893000 | 0.13488300  | 2.90603600  | C | 1.98050700  | -4.47706800 | -2.75295900 |
| C  | -1.13026900 | 1.16052200  | 1.20593700  | C | -0.15230000 | -1.91347900 | 3.86669100  |
| C  | -4.93326400 | 1.36599600  | -3.38265200 | H | 1.13859600  | 0.90761600  | -2.43728500 |
| C  | -3.07496300 | -0.14013500 | -2.95508500 | H | -5.66944900 | 1.78971800  | -4.05946700 |
| C  | -1.19389900 | 2.88736400  | -3.93931500 | H | 0.59740500  | 4.48856100  | -0.67005200 |
| C  | 0.95667100  | -3.26098400 | -0.90578100 | H | 0.61193400  | -4.44457000 | 0.87060500  |
|    |             |             |             | H | 1.50982400  | -2.38859500 | -2.81002700 |



|   |             |             |             |           |             |             |             |
|---|-------------|-------------|-------------|-----------|-------------|-------------|-------------|
| H | -0.62418200 | 2.39227200  | 2.92309300  | H         | 3.18749700  | -1.92476100 | -1.58769400 |
| H | -5.64910700 | -2.54074200 | 1.56607000  | H         | 3.03291100  | -2.44394000 | 0.70426500  |
| H | 2.40485500  | 4.23123000  | 3.94305300  | H         | 5.34065900  | -1.62256800 | 1.69303600  |
| H | -3.94557700 | -1.61884400 | 0.06398900  | H         | 3.87035500  | -1.07610500 | 2.48373200  |
| H | -2.64875400 | -4.04595500 | 2.96419600  | H         | 5.13432700  | 0.90606500  | 2.30372100  |
| H | 1.51188400  | 6.50358800  | 0.39998300  | H         | 5.74617400  | 0.53318800  | 0.70652200  |
| H | -2.34828900 | 1.48771900  | 4.38600200  |           |             |             |             |
| H | -5.59999100 | 2.53452200  | -1.68151100 | <b>1a</b> |             |             |             |
| H | -4.06000200 | 0.08256700  | -4.86514400 | C         | 1.18081800  | 0.41131600  | -1.25663800 |
| H | -1.79384000 | 3.49087700  | -0.64589100 | C         | 0.58469000  | 0.99414100  | 0.00012900  |
| H | 0.31204300  | 1.54218200  | -4.70162900 | C         | 1.18073700  | 0.41097900  | 1.25677700  |
| H | -2.60633100 | 4.13703700  | -2.89160100 | C         | 2.22427400  | -0.43013600 | 1.25803900  |
| H | -0.55517000 | -2.41101500 | -2.90142700 | C         | 2.84310200  | -0.89771200 | -0.00005200 |
| H | -2.22759300 | -1.49603800 | -4.41140800 | C         | 2.22435600  | -0.42979700 | -1.25805800 |
| H | 1.51009500  | -6.52292100 | -0.07928300 | H         | 0.72175000  | 0.74228200  | -2.18602700 |
| H | -1.81978000 | -3.44275900 | 0.71332800  | H         | 0.72161000  | 0.74169500  | 2.18622600  |
| H | -4.19499100 | -0.08762500 | 4.78890500  | H         | 2.65625400  | -0.81120200 | 2.17940800  |
| H | 1.53074600  | 2.20225300  | 2.86366300  | H         | 2.65639700  | -0.81061600 | -2.17950000 |
| H | 1.14709700  | -0.88079000 | 2.48148100  | C         | 0.80357600  | 2.51757400  | 0.00034000  |
| H | -5.78066800 | -1.79654700 | 3.94133700  | H         | 0.34011500  | 2.95546800  | -0.88949300 |
| H | -3.93534300 | 1.61477100  | -0.13586100 | H         | 0.34006300  | 2.95522600  | 0.89026400  |
| H | 2.37096700  | -4.47968500 | -3.76630500 | H         | 1.87198300  | 2.75113400  | 0.00040200  |
| H | 0.30496000  | -1.47264300 | 4.74777400  | O         | -0.84646700 | 0.83825900  | 0.00006400  |
| H | -1.56388600 | 3.15977700  | -4.92344000 | C         | -1.28967900 | -0.52490700 | -0.00014100 |
| H | 2.40786400  | 6.40022600  | 2.71904000  | H         | -0.90383100 | -1.05455700 | 0.88295800  |
| H | -1.59576800 | -3.05835500 | 4.98645800  | H         | -0.90383000 | -1.05428800 | -0.88340200 |
| H | 2.38351100  | -6.56857200 | -2.40923400 | C         | -2.74870300 | -0.54166700 | -0.00015100 |
| C | 3.59864200  | -1.55254500 | 0.43852300  | C         | -3.95866700 | -0.57059500 | -0.00010400 |
| C | 4.44671600  | -0.99566100 | 1.55471200  | C         | -5.41820700 | -0.60522800 | 0.00036200  |
| C | 4.85657400  | 0.47303300  | 1.33704000  | H         | -5.82785000 | -0.10581800 | -0.88591600 |
| C | 3.73492500  | 1.31026100  | 0.74953300  | H         | -5.78390000 | -1.63930200 | -0.00020700 |
| C | 3.52357400  | 1.59892900  | -0.58954100 | H         | -5.82729500 | -0.10697500 | 0.88754800  |
| C | 4.30906900  | 1.06407800  | -1.76097500 | O         | 3.81681400  | -1.65252500 | -0.00012200 |
| C | 4.76689600  | -0.39533500 | -1.57650000 |           |             |             |             |
| C | 3.71068100  | -1.26062500 | -0.91232900 | <b>1b</b> |             |             |             |
| H | 3.24012900  | 1.95843600  | 1.46121900  | C         | 1.51229700  | -1.20984200 | -0.00002100 |
| H | 2.91548300  | 2.47336300  | -0.81565700 | C         | 0.11931000  | -1.21510800 | 0.00003600  |
| H | 5.17689700  | 1.71203400  | -1.95620000 | C         | -0.59198100 | 0.00002600  | 0.00006400  |
| H | 3.67038700  | 1.13233200  | -2.64913900 | C         | 0.11933800  | 1.21514300  | 0.00003200  |
| H | 4.98508300  | -0.82056800 | -2.56172100 |           |             |             |             |
| H | 5.70044400  | -0.43594500 | -1.01127500 |           |             |             |             |

C 1.51232500 1.20984400 -0.00002500  
C 2.21206300 -0.00000700 -0.00005300  
H 2.05300400 -2.15185300 -0.00004100  
H -0.42852300 -2.15213300 0.00006300  
H -0.42847200 2.15218100 0.00005500  
H 2.05305400 2.15184300 -0.00004900  
H 3.29828300 -0.00002000 -0.00009900  
C -2.02183000 0.00004300 0.00013900  
C -3.23301600 0.00004400 0.00013700  
H -4.30209000 -0.00016000 -0.00022900

## COD

C -1.21008800 -1.22153600 -0.50892500  
C -1.92279600 0.00797000 -0.00419100  
C -1.07449400 1.10598500 0.66977100  
C -0.01558000 1.68911400 -0.23779500  
C 1.21008700 1.22153600 -0.50892500  
C 1.92279500 -0.00797000 -0.00419200  
C 1.07449400 -1.10598500 0.66977100  
C 0.01558000 -1.68911400 -0.23779500  
H -0.31336400 2.60072800 -0.75721800  
H 1.81027700 1.80998300 -1.20512300  
H 2.71701200 0.30235900 0.69323300  
H 2.45266700 -0.45498200 -0.85782100  
H 1.75823400 -1.91120900 0.96450400  
H 0.64195000 -0.72799800 1.59828100  
H 0.31336400 -2.60072800 -0.75721800  
H -1.81027800 -1.80998300 -1.20512300  
H -2.71701300 -0.30235900 0.69323300  
H -2.45266800 0.45498200 -0.85782100  
H -1.75823400 1.91120900 0.96450400  
H -0.64195000 0.72799800 1.59828100

## 2

C 3.65122900 -1.21608800 -0.14323500  
C 5.05036400 -0.67547900 0.01822000  
C 5.24210000 0.09219700 1.30170800  
C 4.35358800 0.09068500 2.30528600  
C 3.09868100 -0.67821000 2.22652500

C 2.78741600 -1.32349900 0.92980000  
H 3.50017400 -1.84117900 -1.01715700  
H 6.18565200 0.62612900 1.39077500  
H 4.54054600 0.61486000 3.23817400  
C 6.00199600 -1.89070300 0.01917900  
H 5.91194100 -2.42531400 -0.93180600  
H 7.03337300 -1.54344500 0.13353400  
H 5.75783500 -2.57058300 0.83963900  
O 5.45794400 0.10086200 -1.11058100  
C 4.83850000 1.37316300 -1.16389100  
H 5.19924500 2.00929500 -0.34119000  
O 2.36031100 -0.79429000 3.21024300  
H 2.06948200 -2.12958000 0.96136800  
C 3.35730400 1.37187100 -1.13185600  
C 2.34078200 2.09566300 -1.35393300  
H 5.16764600 1.82354000 -2.10556400  
C 1.90853200 3.44009400 -1.80364000  
H 2.79719300 4.02638100 -2.06662200  
H 1.25430700 3.38982300 -2.67690600  
H 1.36707000 3.97629500 -1.02053100  
Rh 1.67566900 0.31735100 -0.34771500  
P -0.07781500 1.56426400 0.43056900  
P 0.15023100 -1.36261000 -0.72171400  
C -0.41375700 -2.59108700 0.51904300  
C -0.13883800 -2.46010400 1.88458000  
C -3.83999700 0.11838400 -2.61691200  
C -1.45392400 -0.83581900 -1.44597100  
C -4.74326900 -2.57698800 3.36884500  
C -3.00294200 -0.90053800 3.11370200  
C -1.45914700 -4.43535400 2.34758200  
C 0.62830500 2.86858200 1.51142300  
C 1.45195700 -3.63388100 -1.80165700  
C 1.54927700 2.47718600 2.49828100  
C 1.05820300 -2.30371000 -1.99944100  
C 1.90081300 4.78825400 3.11889800  
C -1.15661000 2.42341000 -0.77254500  
C 0.35560500 4.23280500 1.33753400  
C -1.30712600 0.65192200 1.46329800  
C -2.42366900 -0.26303800 -0.62300300  
C -1.68194400 -0.96706800 -2.84024500  
C -5.77864700 1.38031800 -1.02323000

|   |             |             |             |             |             |             |             |
|---|-------------|-------------|-------------|-------------|-------------|-------------|-------------|
| C | -3.63192600 | 0.24312800  | -1.20537000 | H           | -0.45473200 | -3.25974600 | 3.85178800  |
| C | 2.38399200  | -2.23015000 | -4.03430500 | H           | -2.36906900 | -5.37956300 | 0.63235300  |
| C | -4.63387800 | 0.89457200  | -0.43318700 | H           | -0.49610100 | 1.38730200  | 3.33867700  |
| C | -3.08321200 | 3.82893100  | -1.21099200 | H           | -1.97649300 | 0.05551500  | 4.76037000  |
| C | 2.30406500  | -4.25630300 | -2.71723700 | H           | 2.87203000  | 3.10868900  | 4.06846000  |
| C | -2.84627700 | -0.50955600 | -3.40716500 | H           | -2.40163000 | 3.30472400  | 0.76009000  |
| C | -4.83419500 | -2.68771900 | 1.96093500  | H           | -5.17028700 | 0.52903200  | -4.26922900 |
| C | -3.84222600 | -1.70204300 | 3.93103300  | H           | 1.27392800  | -0.55997600 | -3.26578800 |
| C | -1.22868700 | -3.64591000 | 0.07385400  | H           | -0.17803600 | 1.61661300  | -2.50736700 |
| C | -0.66229500 | -3.38098800 | 2.79286400  | H           | -6.88994400 | 1.63873900  | -2.86935900 |
| C | -1.73958300 | -4.56775800 | 0.98464200  | H           | -4.10851700 | -2.03028000 | 0.06805600  |
| C | -1.21889800 | 0.72605400  | 2.87897100  | H           | 0.77631400  | 6.23848600  | 1.98606400  |
| C | -2.04896000 | -0.01946800 | 3.67888900  | H           | -1.70434000 | 2.71897200  | -4.11811500 |
| C | -3.10436000 | -0.99321600 | 1.68835500  | H           | -1.87173400 | -5.14516200 | 3.05844300  |
| C | -2.89319300 | 3.66352400  | -2.58466700 | H           | 3.43340500  | -4.04593100 | -4.54128500 |
| C | 2.17225900  | 3.42954400  | 3.30236000  | H           | -3.57200100 | 4.13686200  | -3.28773400 |
| C | -2.22745200 | 3.20177700  | -0.30657200 | H           | 2.39375500  | 5.53179800  | 3.73839400  |
| C | -5.03022300 | 0.63188200  | -3.19659600 |             |             |             |             |
| C | -2.25391200 | -0.18087000 | 0.86459400  |             |             |             |             |
| C | 2.76971900  | -3.55922400 | -3.83275700 | <b>3-ts</b> |             |             |             |
| C | 1.54348800  | -1.60116900 | -3.11918100 | C           | 3.72102100  | -0.89388900 | -0.30166200 |
| C | -0.97673700 | 2.25582200  | -2.14970100 | C           | 5.16871000  | -0.57541600 | 0.07478600  |
| C | -5.98269200 | 1.24830700  | -2.41767700 | C           | 5.25308200  | 0.17079500  | 1.38441800  |
| C | -4.03692100 | -1.91926800 | 1.14267800  | C           | 4.28269400  | 0.13545900  | 2.30611900  |
| C | 0.99293000  | 5.18491700  | 2.13686800  | C           | 3.07762900  | -0.70229800 | 2.12886500  |
| C | -1.84213700 | 2.87137400  | -3.05180600 | C           | 2.80978300  | -1.23475300 | 0.77191800  |
| H | 0.45912400  | -1.63713200 | 2.25523900  | H           | 3.65313700  | -1.52073100 | -1.18698400 |
| H | -5.37963900 | -3.18947000 | 4.00091400  | H           | 6.17944600  | 0.71475500  | 1.55628800  |
| H | 1.10857800  | -4.18377200 | -0.93349700 | H           | 4.38138400  | 0.63816700  | 3.26411300  |
| H | 1.76368700  | 1.42718600  | 2.65213100  | C           | 5.95934100  | -1.88740600 | 0.15814700  |
| H | -0.34345300 | 4.56193300  | 0.57877400  | H           | 5.93735700  | -2.39300800 | -0.81254100 |
| H | -0.93731500 | -1.44318200 | -3.46532900 | H           | 6.99985100  | -1.67389300 | 0.42154800  |
| H | -6.52813000 | 1.87863100  | -0.41535600 | H           | 5.52939200  | -2.54545400 | 0.91768400  |
| H | 2.74558900  | -1.68071800 | -4.89843600 | O           | 5.76126500  | 0.18489100  | -0.96977900 |
| H | -4.48389700 | 1.02052600  | 0.63176600  | C           | 4.96320600  | 1.32884400  | -1.19593300 |
| H | -3.91046400 | 4.42751500  | -0.84200400 | H           | 5.16907600  | 2.10349600  | -0.44050100 |
| H | 2.60462000  | -5.28681900 | -2.55260600 | O           | 2.36565400  | -0.95912300 | 3.10754300  |
| H | -3.01573800 | -0.62126500 | -4.47457400 | H           | 2.33242900  | -2.20770900 | 0.73578400  |
| H | -5.53355300 | -3.39317500 | 1.52182700  | C           | 3.50548700  | 0.98927900  | -1.15543600 |
| H | -3.75000800 | -1.61416000 | 5.01021200  | C           | 2.43111700  | 1.64905900  | -1.46176900 |
| H | -1.47000000 | -3.74077700 | -0.98057400 |             |             |             |             |

|    |             |             |             |   |             |             |             |
|----|-------------|-------------|-------------|---|-------------|-------------|-------------|
| H  | 5.22494100  | 1.72757000  | -2.18037900 | C | 2.31217600  | 3.52517900  | 3.05684600  |
| C  | 2.17877900  | 2.96562100  | -2.11114200 | C | -2.17800400 | 3.30060200  | -0.47246600 |
| H  | 3.12724400  | 3.45575600  | -2.36311300 | C | -5.01522300 | 0.63647700  | -3.20617700 |
| H  | 1.59769900  | 2.84949900  | -3.03076900 | C | -2.27241000 | -0.07856700 | 0.89621300  |
| H  | 1.61008400  | 3.62903500  | -1.45311100 | C | 2.57306600  | -3.85920100 | -3.66713000 |
| Rh | 1.58442100  | 0.23263800  | -0.26195600 | C | 1.44801000  | -1.82127500 | -3.01230800 |
| P  | -0.09445100 | 1.61832300  | 0.34505600  | C | -0.95508600 | 2.21791200  | -2.26120100 |
| P  | 0.07562800  | -1.44307500 | -0.60890600 | C | -5.94922000 | 1.31718700  | -2.45911400 |
| C  | -0.51606000 | -2.61987800 | 0.65684600  | C | -4.08699300 | -1.76225300 | 1.27519900  |
| C  | -0.13412600 | -2.50859800 | 1.99648700  | C | 1.26973300  | 5.26218500  | 1.74007600  |
| C  | -3.84511000 | 0.10905300  | -2.59880900 | C | -1.79223300 | 2.82172800  | -3.19757800 |
| C  | -1.50000700 | -0.88150800 | -1.37167000 | H | 0.56624000  | -1.74473100 | 2.31185800  |
| C  | -4.75251100 | -2.32668800 | 3.53889300  | H | -5.38614200 | -2.90332100 | 4.20644500  |
| C  | -2.98562700 | -0.69652200 | 3.18521100  | H | 0.94544700  | -4.28928000 | -0.71359500 |
| C  | -1.56376300 | -4.38082700 | 2.55773300  | H | 1.74202000  | 1.51126100  | 2.58311900  |
| C  | 0.70736300  | 2.93844900  | 1.32943200  | H | -0.12457600 | 4.61244500  | 0.24205700  |
| C  | 1.29861700  | -3.79004900 | -1.60830900 | H | -1.00323600 | -1.60270700 | -3.35885200 |
| C  | 1.60498800  | 2.55934800  | 2.34416700  | H | -6.48255500 | 2.04881400  | -0.48829600 |
| C  | 0.95794600  | -2.45279200 | -1.85443700 | H | 2.60639100  | -2.02695700 | -4.81052600 |
| C  | 2.14929400  | 4.88001500  | 2.75340700  | H | -4.47065600 | 1.16956700  | 0.60591600  |
| C  | -1.13800000 | 2.45778600  | -0.89524100 | H | -3.81479200 | 4.55538100  | -1.07850400 |
| C  | 0.54993600  | 4.29870900  | 1.02948800  | H | 2.36256700  | -5.52193600 | -2.31023900 |
| C  | -1.31466200 | 0.77753900  | 1.44136600  | H | -3.04020400 | -0.74313700 | -4.41622900 |
| C  | -2.44957800 | -0.23030900 | -0.58427300 | H | -5.60948100 | -3.18380900 | 1.74056700  |
| C  | -1.72891600 | -1.06797600 | -2.75982600 | H | -3.70120100 | -1.32981600 | 5.12257100  |
| C  | -5.74643100 | 1.50219000  | -1.07040700 | H | -1.74185900 | -3.69576700 | -0.76833200 |
| C  | -3.63748200 | 0.29020500  | -1.19347300 | H | -0.37306000 | -3.28706400 | 3.98506100  |
| C  | 2.24084000  | -2.52404200 | -3.91676800 | H | -2.64660200 | -5.26490700 | 0.91176200  |
| C  | -4.62007600 | 1.00590500  | -0.45421400 | H | -0.46874100 | 1.59175400  | 3.26863400  |
| C  | -3.00803500 | 3.90977500  | -1.41198400 | H | -1.91677300 | 0.31313000  | 4.77160700  |
| C  | 2.10349600  | -4.48690400 | -2.51278900 | H | 2.99332000  | 3.21840600  | 3.84504800  |
| C  | -2.87162100 | -0.58987600 | -3.35384800 | H | -2.34767500 | 3.46824400  | 0.58680700  |
| C  | -4.88233600 | -2.48178800 | 2.13813900  | H | -5.15528100 | 0.49123600  | -4.27390100 |
| C  | -3.81969200 | -1.45344000 | 4.04955000  | H | 1.22118900  | -0.77624800 | -3.19875700 |
| C  | -1.42803600 | -3.61605100 | 0.26832200  | H | -0.18147300 | 1.53146100  | -2.58289800 |
| C  | -0.66309200 | -3.38814600 | 2.94324400  | H | -6.84158700 | 1.71714000  | -2.93164300 |
| C  | -1.94073600 | -4.49784700 | 1.21621500  | H | -4.18793700 | -1.90679200 | 0.20689100  |
| C  | -1.19903500 | 0.91155000  | 2.85054400  | H | 1.14013400  | 6.31265100  | 1.49651300  |
| C  | -2.01241900 | 0.19737200  | 3.69551800  | H | -1.65382300 | 2.61573600  | -4.25478400 |
| C  | -3.12033200 | -0.84112600 | 1.76675300  | H | -1.97883800 | -5.05835400 | 3.29823500  |
| C  | -2.81784100 | 3.66998100  | -2.77513300 | H | 3.19851700  | -4.40412700 | -4.36807700 |

|          |             |             |             |   |             |             |             |
|----------|-------------|-------------|-------------|---|-------------|-------------|-------------|
| H        | -3.47661200 | 4.13215400  | -3.50424300 | C | -2.10292900 | -3.40239900 | 1.43595100  |
| H        | 2.70632800  | 5.63249100  | 3.30395200  | C | -0.85155600 | 3.23341100  | -2.09359500 |
| <b>4</b> |             |             |             | C | -1.51544900 | -2.17126700 | 1.75909400  |
|          |             |             |             | C | -0.79769300 | 5.61692000  | -2.49027200 |
|          |             |             |             | C | 1.84852300  | 2.36476400  | 1.05313900  |
| C        | -4.04140200 | -0.49002800 | 0.34367400  | C | 0.71817700  | 4.62434300  | -0.88104800 |
| C        | -5.50987800 | -0.11997700 | 0.04969100  | C | 1.65816700  | 0.77733600  | -1.36293300 |
| C        | -5.58622800 | 0.90963200  | -1.05344200 | C | 2.32445100  | -0.63872400 | 0.62937000  |
| C        | -4.63562900 | 1.06485800  | -1.98839500 | C | 1.36099400  | -1.34943700 | 2.76000400  |
| C        | -3.43627700 | 0.19995000  | -2.03790400 | C | 5.93145300  | 0.20998600  | 1.26311700  |
| C        | -3.08024200 | -0.58743800 | -0.83423300 | C | 3.58234300  | -0.43846900 | 1.29187600  |
| H        | -4.03937000 | -1.42960700 | 0.90919400  | C | -2.84717100 | -2.08229100 | 3.78440400  |
| H        | -6.48919500 | 1.51766000  | -1.07098100 | C | 4.73735600  | 0.02847700  | 0.60323100  |
| H        | -4.74350700 | 1.78384000  | -2.79733700 | C | 4.01293600  | 3.26908900  | 1.66349700  |
| C        | -6.41121500 | -1.30878000 | -0.25849300 | C | -3.05681200 | -3.96772900 | 2.28513900  |
| H        | -6.39032000 | -2.01161700 | 0.58132700  | C | 2.55868400  | -1.15766300 | 3.40305100  |
| H        | -7.44511400 | -0.98555900 | -0.42083000 | C | 4.20884600  | -3.30617000 | -2.16294800 |
| H        | -6.06320900 | -1.82189500 | -1.16126800 | C | 3.56862000  | -1.91441000 | -4.03248700 |
| O        | -5.97318700 | 0.47010700  | 1.28734800  | C | 0.58174600  | -3.71873000 | -0.49511300 |
| C        | -4.87684700 | 1.11063300  | 1.96352200  | C | -0.02312400 | -3.02779200 | -3.13654300 |
| H        | -4.99005600 | 2.20312300  | 1.92974000  | C | 0.90646600  | -4.58659000 | -1.53550200 |
| O        | -2.74080000 | 0.17246000  | -3.07063700 | C | 1.66108300  | 1.02609100  | -2.76145500 |
| H        | -2.82654600 | -1.61135100 | -1.11163000 | C | 2.27185100  | 0.15240000  | -3.62783200 |
| C        | -3.63731200 | 0.63914500  | 1.24296600  | C | 2.92139800  | -1.28223300 | -1.73972400 |
| C        | -2.39970500 | 1.15588900  | 1.22851000  | C | 3.71195600  | 3.07830600  | 3.01461800  |
| H        | -4.90343900 | 0.79883100  | 3.01644800  | C | -1.33596400 | 4.35607600  | -2.76224500 |
| C        | -1.94298700 | 2.24379500  | 2.15482600  | C | 3.09006400  | 2.90759700  | 0.68399900  |
| H        | -2.81373500 | 2.77342500  | 2.56625500  | C | 4.93813000  | -0.49193800 | 3.35088500  |
| H        | -1.38926300 | 1.82954900  | 3.00671600  | C | 2.26764200  | -0.36994100 | -0.84786900 |
| H        | -1.30079200 | 2.98291700  | 1.66746600  | C | -3.43128600 | -3.31007700 | 3.45695800  |
| Rh       | -1.30603200 | 0.50520300  | -0.30382900 | C | -1.90181200 | -1.50958200 | 2.93765800  |
| P        | 0.67040200  | 1.84464900  | -0.23702900 | C | 1.55270600  | 2.17594700  | 2.40796000  |
| P        | -0.41462700 | -1.33196400 | 0.57289900  | C | 6.03693600  | -0.05139300 | 2.65016600  |
| C        | -0.06595000 | -2.50603100 | -0.77471500 | C | 3.57833700  | -2.45788400 | -1.28122200 |
| C        | -0.36796500 | -2.16267100 | -2.09837200 | C | 0.22433600  | 5.74730300  | -1.54834500 |
| C        | 3.69526600  | -0.69808800 | 2.69581700  | C | 2.48230100  | 2.53119900  | 3.38466200  |
| C        | 1.22504300  | -1.08774000 | 1.37019100  | H | -0.86558900 | -1.22460800 | -2.32380600 |
| C        | 4.20543800  | -3.03586300 | -3.55223700 | H | 4.70343100  | -3.71740600 | -4.23559900 |
| C        | 2.91962000  | -1.01346100 | -3.14755800 | H | -1.83079800 | -3.91662600 | 0.52181400  |
| C        | 0.61107100  | -4.23930000 | -2.85670000 | H | -1.28701800 | 2.25814300  | -2.30549900 |
| C        | 0.19154700  | 3.35460200  | -1.15435100 | H | 1.50551100  | 4.74346600  | -0.14573500 |

|              |             |             |             |   |             |             |             |
|--------------|-------------|-------------|-------------|---|-------------|-------------|-------------|
| H            | 0.51555800  | -1.72458600 | 3.32106100  | C | -1.69139100 | -1.64403200 | 2.81994400  |
| H            | 6.79907400  | 0.56767900  | 0.71658100  | C | -0.39424700 | 4.40053600  | -1.00043300 |
| H            | -3.13740800 | -1.56399500 | 4.69341200  | C | -1.08302200 | -2.36195300 | 1.77311600  |
| H            | 4.67159000  | 0.25077100  | -0.45432900 | C | -1.97728400 | 5.06334600  | -2.71040100 |
| H            | 4.97434700  | 3.68056900  | 1.37139800  | C | 1.20294700  | 2.45542400  | 0.91470400  |
| H            | -3.50866900 | -4.91980600 | 2.02336800  | C | -1.50734200 | 2.72016700  | -2.34444600 |
| H            | 2.64729300  | -1.36688500 | 4.46552000  | C | 1.37205700  | 0.83899100  | -1.44847900 |
| H            | 4.70430500  | -4.19805900 | -1.79063000 | C | 2.41680600  | -0.27117800 | 0.57451700  |
| H            | 3.55351700  | -1.69610300 | -5.09685000 | C | 1.61470800  | -1.12902800 | 2.71242300  |
| H            | 0.83709000  | -3.97822300 | 0.52799700  | C | 5.75579200  | 1.34137100  | 1.18005400  |
| H            | -0.24483800 | -2.74977600 | -4.16247600 | C | 3.60695000  | 0.19542600  | 1.22312600  |
| H            | 1.40864900  | -5.52423700 | -1.31711700 | C | -2.07092700 | -4.40033600 | 2.63143400  |
| H            | 1.18467100  | 1.92049100  | -3.14649500 | C | 4.62696900  | 0.90181500  | 0.52614200  |
| H            | 2.27729600  | 0.35430200  | -4.69549500 | C | 3.11667700  | 3.82710700  | 1.48447300  |
| H            | -2.13565800 | 4.24543700  | -3.48882600 | C | -2.46928100 | -2.30422000 | 3.76835400  |
| H            | 3.33983800  | 3.03101500  | -0.36551500 | C | 2.76007100  | -0.70787400 | 3.34351900  |
| H            | 5.00050900  | -0.69167900 | 4.41710400  | C | 4.84466700  | -2.51562900 | -2.15640300 |
| H            | -1.47579700 | -0.54435400 | 3.18786200  | C | 3.90440100  | -1.35620800 | -4.05727200 |
| H            | 0.61529700  | 1.72156400  | 2.69713000  | C | 1.25477600  | -3.63259600 | -0.39419200 |
| H            | 6.98486900  | 0.10126900  | 3.15770000  | C | 0.70041600  | -3.16706300 | -3.09050800 |
| H            | 3.57559700  | -2.68736100 | -0.22280900 | C | 1.77266600  | -4.48357300 | -1.36904900 |
| H            | 0.64077400  | 6.72596000  | -1.32796600 | C | 1.31235500  | 1.03681500  | -2.85385600 |
| H            | 2.25109800  | 2.36513900  | 4.43268200  | C | 2.13933700  | 0.33837200  | -3.69874700 |
| H            | 0.88443100  | -4.90884200 | -3.66672400 | C | 3.13439900  | -0.82313600 | -1.77748100 |
| H            | -4.17703500 | -3.74872700 | 4.11333200  | C | 2.90388300  | 3.56024400  | 2.83926000  |
| H            | 4.43935100  | 3.34545800  | 3.77536900  | C | -1.08556600 | 5.39904600  | -1.69184400 |
| H            | -1.17833600 | 6.49385100  | -3.00566900 | C | 2.27711800  | 3.26945500  | 0.52169900  |
|              |             |             |             | C | 4.95047000  | 0.43947800  | 3.27358900  |
| <b>3'-ts</b> |             |             |             | C | 2.28329300  | -0.06726000 | -0.90414400 |
|              |             |             |             | C | -2.65990100 | -3.68596500 | 3.67582900  |
| Rh           | -1.58321400 | 0.33555800  | 0.08258300  | C | -1.28682700 | -3.74418300 | 1.67994700  |
| P            | 0.15157200  | 1.68595000  | -0.36224100 | C | 1.00050200  | 2.18362000  | 2.27132800  |
| P            | -0.15528400 | -1.40187100 | 0.52259800  | C | 5.92301400  | 1.10859100  | 2.56623800  |
| C            | 0.43233000  | -2.55697200 | -0.76464600 | C | 4.04334000  | -1.80414200 | -1.29216900 |
| C            | 0.16483500  | -2.32634800 | -2.11665500 | C | -2.18538300 | 3.71957800  | -3.03795400 |
| C            | 3.77667200  | -0.02982900 | 2.62717700  | C | 1.84779200  | 2.73470400  | 3.23049800  |
| C            | 1.42778600  | -0.90842800 | 1.32306200  | H | -0.42625700 | -1.46948400 | -2.40958000 |
| C            | 4.78083300  | -2.28912700 | -3.55196100 | H | 5.42003400  | -2.85847700 | -4.22040700 |
| C            | 3.06240500  | -0.60966500 | -3.19199300 | H | -1.55464500 | -0.56872400 | 2.88571200  |
| C            | 1.49757500  | -4.25073100 | -2.71882200 | H | 0.28833800  | 4.67773000  | -0.20619500 |
| C            | -0.59411600 | 3.05331800  | -1.32623900 | H | -1.69193900 | 1.67736000  | -2.58435200 |

|   |             |             |             |                |             |             |             |
|---|-------------|-------------|-------------|----------------|-------------|-------------|-------------|
| H | 0.84941500  | -1.64118700 | 3.28207400  | C              | -2.09537300 | 2.90556200  | 2.19204100  |
| H | 6.52158500  | 1.88044300  | 0.63002500  | H              | -1.67763000 | 2.48912400  | 3.11271800  |
| H | -2.22518900 | -5.47217500 | 2.54854700  | H              | -1.36558000 | 3.61625500  | 1.79135400  |
| H | 4.50707100  | 1.10087900  | -0.53158900 | H              | -3.01088500 | 3.45633800  | 2.44274800  |
| H | 3.94865100  | 4.45257600  | 1.17553600  | O              | -2.64916300 | -3.23846900 | -1.16053300 |
| H | -2.93022300 | -1.74041100 | 4.57406900  | H              | -3.83349800 | 0.97269400  | -1.71685700 |
| H | 2.89653500  | -0.88801600 | 4.40638900  | H              | -2.37785100 | -0.84150700 | -2.19356400 |
| H | 5.52630100  | -3.26484400 | -1.76452100 | C              | -6.11144800 | -0.44567100 | -1.59030600 |
| H | 3.83668800  | -1.17803200 | -5.12702700 | H              | -5.73108900 | -1.28429800 | -2.18094500 |
| H | 1.50053900  | -3.79850300 | 0.65037900  | H              | -7.11006800 | -0.69903100 | -1.22108000 |
| H | 0.50303900  | -2.96836100 | -4.13966300 | H              | -6.18827200 | 0.44062500  | -2.22901900 |
| H | 2.40595100  | -5.31560000 | -1.07574100 |                |             |             |             |
| H | 0.61902600  | 1.75912900  | -3.26577900 | <b>3'-ts-1</b> |             |             |             |
| H | 2.09434400  | 0.50794800  | -4.77107100 |                |             |             |             |
| H | -0.92443500 | 6.44029500  | -1.42843900 | Rh             | -1.64978400 | 0.29741500  | -0.00555300 |
| H | 2.46304500  | 3.45730500  | -0.53150300 | P              | 0.07377600  | 1.68798200  | -0.44787700 |
| H | 5.06179300  | 0.26044200  | 4.33957200  | P              | -0.13765600 | -1.40449000 | 0.46109200  |
| H | -0.85730200 | -4.30712300 | 0.86168600  | C              | 0.45597000  | -2.57745400 | -0.80865400 |
| H | 0.20464100  | 1.51262400  | 2.56766000  | C              | 0.08952100  | -2.44662900 | -2.15053900 |
| H | 6.81806300  | 1.46368700  | 3.06862100  | C              | 3.77716700  | 0.06680800  | 2.54359700  |
| H | 4.09276900  | -2.00128300 | -0.22865800 | C              | 1.45504300  | -0.89231400 | 1.24454800  |
| H | -2.88000300 | 3.45038600  | -3.82825100 | C              | 4.72752200  | -2.27729900 | -3.63871900 |
| H | 1.69352100  | 2.50475600  | 4.28045200  | C              | 2.90119000  | -0.71803500 | -3.26993500 |
| H | 1.91756100  | -4.90321400 | -3.47867000 | C              | 1.52650900  | -4.30004300 | -2.73678700 |
| H | -3.27038500 | -4.20108400 | 4.41178700  | C              | -0.36664100 | 3.15607300  | -1.46769400 |
| H | 3.57022800  | 3.98164900  | 3.58596000  | C              | -1.64154800 | -1.62444900 | 2.77953800  |
| H | -2.51179600 | 5.84288100  | -3.24526300 | C              | -1.66863400 | 3.67362000  | -1.46682200 |
| C | -3.79809600 | 0.21216200  | -0.93954700 | C              | -1.01020700 | -2.35591700 | 1.75710700  |
| C | -5.18247900 | -0.14821000 | -0.39878500 | C              | -0.98631300 | 5.47617300  | -2.93063600 |
| C | -5.11476000 | -1.34247900 | 0.51756100  | C              | 1.03000400  | 2.39842900  | 0.95378100  |
| C | -4.19278700 | -2.30225100 | 0.36764700  | C              | 0.62153500  | 3.81004500  | -2.22746600 |
| C | -3.18787400 | -2.22123900 | -0.71774500 | C              | 1.26302500  | 0.77499600  | -1.51261300 |
| C | -2.88918700 | -0.87085800 | -1.23701600 | C              | 2.41764500  | -0.21180000 | 0.49940200  |
| H | -5.90036600 | -1.41119300 | 1.26616400  | C              | 1.67326500  | -1.14135400 | 2.62450400  |
| H | -4.18534100 | -3.20026900 | 0.97696500  | C              | 5.64958900  | 1.59277800  | 1.10579000  |
| O | -5.75405000 | 0.95355800  | 0.32358900  | C              | 3.58487100  | 0.30431100  | 1.14485600  |
| C | -4.85992700 | 2.05215500  | 0.40895800  | C              | -1.83154300 | -4.40661600 | 2.74819000  |
| H | -4.96183600 | 2.70923000  | -0.46933300 | C              | 4.55235500  | 1.08186200  | 0.45018500  |
| H | -5.11955100 | 2.62753500  | 1.30291100  | C              | 2.75920000  | 3.86292100  | 1.81903600  |
| C | -3.46694200 | 1.54818800  | 0.51681700  | C              | -2.34776300 | -2.28315900 | 3.78368900  |
| C | -2.40661500 | 1.84562200  | 1.19613300  | C              | 2.80831000  | -0.68582900 | 3.25128700  |

|   |             |             |             |           |             |             |             |
|---|-------------|-------------|-------------|-----------|-------------|-------------|-------------|
| C | 4.91246900  | -2.38371800 | -2.24037200 | H         | 5.05232300  | 0.41748200  | 4.25275300  |
| C | 3.73666700  | -1.46398900 | -4.14066600 | H         | -0.66323200 | -4.32701700 | 0.94615700  |
| C | 1.37576300  | -3.57118200 | -0.43638000 | H         | -0.00225100 | 1.22210500  | 2.42765500  |
| C | 0.62580200  | -3.30245000 | -3.11117200 | H         | 6.70882300  | 1.76351000  | 2.99207900  |
| C | 1.89902400  | -4.43468200 | -1.39676900 | H         | 4.26184100  | -1.77804000 | -0.30297000 |
| C | 1.04399100  | 0.80289100  | -2.91943300 | H         | 1.08767600  | 5.45203200  | -3.52995700 |
| C | 1.84666100  | 0.08709300  | -3.77055100 | H         | 1.26694400  | 2.13491000  | 4.34074500  |
| C | 3.09696600  | -0.80622500 | -1.85427600 | H         | 1.94940300  | -4.96169800 | -3.48701900 |
| C | 2.48484400  | 3.43094100  | 3.11788700  | H         | -2.99707700 | -4.19273300 | 4.54920500  |
| C | -1.97479700 | 4.82758900  | -2.19116800 | H         | 3.05374800  | 3.82518200  | 3.95468600  |
| C | 2.03611600  | 3.35248100  | 0.74151900  | H         | -1.22549400 | 6.37252000  | -3.49537200 |
| C | 4.92135200  | 0.60412200  | 3.19034100  | C         | -3.89665100 | 0.01366900  | -0.96614100 |
| C | 2.25346000  | -0.04290700 | -0.97738200 | C         | -5.25387500 | -0.34452700 | -0.36183800 |
| C | -2.44329300 | -3.67768000 | 3.76963700  | C         | -5.12811100 | -1.46917900 | 0.63442600  |
| C | -1.11715100 | -3.75161900 | 1.74277900  | C         | -4.18577500 | -2.41478100 | 0.52534100  |
| C | 0.76009900  | 1.97252100  | 2.25999200  | C         | -3.20669800 | -2.37627600 | -0.58436600 |
| C | 5.83896000  | 1.35214700  | 2.48839100  | C         | -2.96016400 | -1.05423600 | -1.19509700 |
| C | 4.11551600  | -1.67288900 | -1.37050300 | H         | -5.89352300 | -1.50591100 | 1.40586900  |
| C | 0.31241900  | 4.96121600  | -2.94906100 | H         | -4.13818700 | -3.26906900 | 1.19331700  |
| C | 1.48115700  | 2.48516500  | 3.33547800  | O         | -5.84757000 | 0.78808800  | 0.29084200  |
| H | -0.58159400 | -1.65554100 | -2.45159500 | C         | -4.97660200 | 1.90770500  | 0.32136800  |
| H | 5.36264300  | -2.84554400 | -4.31196900 | H         | -5.10503000 | 2.52475300  | -0.58224300 |
| H | -1.57611500 | -0.54027700 | 2.78262900  | H         | -5.24024200 | 2.51471700  | 1.19323300  |
| H | -2.44770600 | 3.17943200  | -0.90289700 | C         | -3.57095800 | 1.44686800  | 0.43714800  |
| H | 1.62930200  | 3.41389800  | -2.27593200 | C         | -2.51270900 | 1.78372600  | 1.10078700  |
| H | 0.93722400  | -1.69485900 | 3.19353700  | C         | -2.21829800 | 2.88062900  | 2.06142200  |
| H | 6.37372600  | 2.19156200  | 0.56111400  | H         | -1.75006100 | 2.51117400  | 2.97648800  |
| H | -1.91191200 | -5.48949900 | 2.72740200  | H         | -1.53596800 | 3.61398400  | 1.61960800  |
| H | 4.41050700  | 1.28299500  | -0.60525200 | H         | -3.15218400 | 3.39185600  | 2.32730700  |
| H | 3.54377700  | 4.59195300  | 1.63986900  | O         | -2.64323300 | -3.40121400 | -0.97462300 |
| H | -2.82694200 | -1.70925300 | 4.57145600  | H         | -3.96720300 | 0.72694300  | -1.78447300 |
| H | 2.96623100  | -0.88488600 | 4.30775700  | H         | -2.45809900 | -1.07055600 | -2.15644100 |
| H | 5.68423400  | -3.03985700 | -1.84876300 | C         | -6.20104500 | -0.75633400 | -1.50449100 |
| H | 3.57167800  | -1.38401500 | -5.21173800 | H         | -5.80909500 | -1.62557600 | -2.04081800 |
| H | 1.69647100  | -3.65897400 | 0.59716600  | H         | -7.18174100 | -1.01072800 | -1.09053800 |
| H | 0.34928300  | -3.17908100 | -4.15407800 | H         | -6.32162800 | 0.07715100  | -2.20435200 |
| H | 2.61125100  | -5.19933200 | -1.10143300 |           |             |             |             |
| H | 0.23791600  | 1.40282600  | -3.32502100 | <b>4'</b> |             |             |             |
| H | 1.67703000  | 0.12381300  | -4.84314000 |           |             |             |             |
| H | -2.98974900 | 5.21409800  | -2.17631500 | Rh        | -1.32494600 | 0.61944700  | -0.45653800 |
| H | 2.26960000  | 3.69440400  | -0.25904200 | P         | 0.75937600  | 1.82305700  | -0.35271800 |



|   |             |             |             |   |             |             |             |
|---|-------------|-------------|-------------|---|-------------|-------------|-------------|
| P | -0.55578000 | -1.30894300 | 0.37426200  | C | 5.53265200  | 0.03304100  | 3.34046000  |
| C | -0.04038300 | -2.34818800 | -1.02756600 | C | 3.73878400  | -2.51654600 | -0.81395500 |
| C | -0.37473400 | -1.95406300 | -2.32885200 | C | -1.01272400 | 3.99838700  | -3.34642000 |
| C | 3.21810600  | -0.64303100 | 3.04856300  | C | 2.77787500  | 2.87953800  | 3.09364000  |
| C | 0.97129200  | -1.06752900 | 1.37718700  | H | -0.97607100 | -1.06514800 | -2.48128100 |
| C | 4.64432400  | -3.22208500 | -2.95045600 | H | 5.22342800  | -3.93871800 | -3.52539300 |
| C | 3.31910200  | -1.18734100 | -2.82862000 | H | -2.24236700 | -0.68342300 | 2.70415500  |
| C | 0.80094200  | -3.86843200 | -3.21502800 | H | 1.09711300  | 4.79327100  | -0.18662900 |
| C | 0.28208500  | 3.22501600  | -1.43227500 | H | -0.70652300 | 1.92817100  | -2.85858300 |
| C | -2.36528400 | -1.73399800 | 2.48434500  | H | -0.03415500 | -1.61585500 | 3.22240600  |
| C | 0.51467500  | 4.56015400  | -1.07048100 | H | 6.55815800  | 0.65839400  | 1.53490500  |
| C | -1.68939400 | -2.31657500 | 1.40016400  | H | -2.93187900 | -5.47581700 | 1.66560900  |
| C | -0.76367500 | 5.32426200  | -2.98306800 | H | 4.63831000  | 0.27563500  | 0.06305800  |
| C | 1.95408400  | 2.52773000  | 0.84389600  | H | 4.96328000  | 4.12839700  | 0.80370400  |
| C | -0.50119200 | 2.95723700  | -2.57340600 | H | -3.71684000 | -2.03318800 | 4.12555900  |
| C | 1.82406800  | 0.68091100  | -1.32923900 | H | 1.91015600  | -1.25076000 | 4.66043300  |
| C | 2.17413900  | -0.64829800 | 0.79700300  | H | 4.93419500  | -4.26604600 | -1.07172600 |
| C | 0.89292200  | -1.27349900 | 2.78217000  | H | 4.19130900  | -1.97894600 | -4.63995700 |
| C | 5.62756200  | 0.28331800  | 1.95033400  | H | 0.99492100  | -3.81196100 | 0.17964600  |
| C | 3.31443700  | -0.41424800 | 1.63809600  | H | -0.19253300 | -2.38439100 | -4.42784900 |
| C | -2.76722900 | -4.42988200 | 1.90694200  | H | 1.70478100  | -5.17537800 | -1.75685300 |
| C | 4.55067400  | 0.06586200  | 1.12150100  | H | 1.65511500  | 1.76171700  | -3.20290300 |
| C | 4.07557100  | 3.64800300  | 1.20456900  | H | 2.92147200  | 0.11069700  | -4.51185900 |
| C | -3.20802900 | -2.49984500 | 3.28739200  | H | 0.18741200  | 6.62862400  | -1.55364500 |
| C | 1.98396400  | -1.07436600 | 3.59092000  | H | 3.24789200  | 3.24379000  | -0.73700900 |
| C | 4.48062300  | -3.40661100 | -1.55673500 | H | 4.25498100  | -0.60446500 | 4.94302900  |
| C | 4.07108100  | -2.13608600 | -3.57152300 | H | -1.43829500 | -4.13209000 | 0.25229000  |
| C | 0.71379800  | -3.51197800 | -0.82481100 | H | 0.94244700  | 1.87044400  | 2.62670600  |
| C | 0.05609300  | -2.70411300 | -3.42027400 | H | 6.39319500  | 0.20680800  | 3.97974700  |
| C | 1.11867800  | -4.27636400 | -1.91819500 | H | 3.60530700  | -2.68446700 | 0.24758500  |
| C | 2.04638100  | 0.87634700  | -2.71646600 | H | -1.60375800 | 3.77300900  | -4.22924600 |
| C | 2.76012900  | -0.04212700 | -3.44817900 | H | 2.65599300  | 2.75067300  | 4.16482500  |
| C | 3.13453200  | -1.38062600 | -1.42106300 | H | 1.13649400  | -4.45498200 | -4.06506300 |
| C | 3.91283300  | 3.51088000  | 2.58649300  | H | -4.06993300 | -4.44820500 | 3.62547500  |
| C | -0.00451800 | 5.59985100  | -1.84418700 | H | 4.67577400  | 3.88463600  | 3.26305000  |
| C | 3.10723000  | 3.15152100  | 0.33567000  | H | -1.16247400 | 6.13734700  | -3.58229000 |
| C | 4.34913900  | -0.41843400 | 3.87659400  | C | -4.14338100 | 1.08647400  | -0.49045800 |
| C | 2.34777200  | -0.43935800 | -0.68053000 | C | -5.57216200 | 0.72147300  | -0.02694800 |
| C | -3.40848700 | -3.85213300 | 3.00358600  | C | -5.57821600 | -0.65565100 | 0.59062800  |
| C | -1.91317200 | -3.66957400 | 1.10685900  | C | -4.71603300 | -1.61759000 | 0.23269300  |
| C | 1.80021500  | 2.38935000  | 2.22589200  | C | -3.70939800 | -1.40887700 | -0.83522200 |

|   |             |             |             |
|---|-------------|-------------|-------------|
| C | -3.27778200 | -0.02264100 | -1.11697900 |
| H | -6.36517300 | -0.84867500 | 1.31811500  |
| H | -4.78117800 | -2.62300700 | 0.63774400  |
| O | -5.87619800 | 1.71208100  | 0.98173800  |
| C | -4.67210300 | 2.12483100  | 1.64769600  |
| H | -4.68142700 | 3.22088600  | 1.70442400  |
| H | -4.64192800 | 1.73290800  | 2.67470700  |
| C | -3.54624500 | 1.56948200  | 0.81049100  |
| C | -2.26684800 | 1.34076200  | 1.13139300  |
| C | -1.61352000 | 1.70307500  | 2.42714600  |
| H | -0.89758900 | 0.94124300  | 2.75109600  |
| H | -1.06743900 | 2.64960100  | 2.34153800  |
| H | -2.36489700 | 1.82168800  | 3.22013900  |
| O | -3.28104400 | -2.38244800 | -1.46637300 |
| H | -4.22800000 | 1.92197300  | -1.19845500 |
| H | -3.14362700 | 0.09652300  | -2.19850700 |
| C | -6.63717700 | 0.83585700  | -1.11110500 |
| H | -6.41550300 | 0.14485300  | -1.93118500 |
| H | -7.62798500 | 0.59174200  | -0.71285700 |
| H | -6.66001400 | 1.85893200  | -1.50221900 |

**5-ts**

|    |             |             |             |
|----|-------------|-------------|-------------|
| Rh | -1.32494600 | 0.61944700  | -0.45653800 |
| P  | 0.46900200  | 1.67893200  | -0.32163700 |
| P  | -0.15888900 | -1.43331400 | 0.19650800  |
| C  | 0.40897100  | -2.33436400 | -1.28714300 |
| C  | 0.03119400  | -1.87870600 | -2.55839300 |
| C  | 3.47180800  | -0.69040100 | 3.00113800  |
| C  | 1.33373400  | -1.26448800 | 1.24496800  |
| C  | 5.18200700  | -2.43945900 | -3.18502500 |
| C  | 3.60249900  | -0.61565900 | -2.89400600 |
| C  | 1.32967100  | -3.64298000 | -3.57869800 |
| C  | 0.11476400  | 3.28642900  | -1.12180400 |
| C  | -1.75844500 | -3.73493000 | 0.45706800  |
| C  | -0.50624900 | 3.28489500  | -2.38373900 |
| C  | -1.32461500 | -2.54013800 | 1.05316300  |
| C  | -0.59126700 | 5.70115100  | -2.36445300 |
| C  | 1.17746100  | 2.06613100  | 1.31483500  |
| C  | 0.34942900  | 4.51051500  | -0.47767700 |
| C  | 1.83333200  | 0.86536900  | -1.25267100 |

|   |             |             |             |
|---|-------------|-------------|-------------|
| C | 2.44357800  | -0.57708800 | 0.75430500  |
| C | 1.31045900  | -1.71242400 | 2.59184000  |
| C | 5.68272600  | 0.77951500  | 2.08212100  |
| C | 3.53335500  | -0.27314800 | 1.63253200  |
| C | -2.88069300 | -2.90825900 | 2.88097300  |
| C | 4.67123300  | 0.46457500  | 1.20288100  |
| C | 2.92848500  | 3.11413700  | 2.62220500  |
| C | -2.74321500 | -4.50845400 | 1.07267200  |
| C | 2.35119700  | -1.43514500 | 3.44365100  |
| C | 5.05035400  | -2.76532500 | -1.81409000 |
| C | 4.46991500  | -1.38625000 | -3.71213800 |
| C | 1.23950500  | -3.45784700 | -1.16858800 |
| C | 0.49513000  | -2.52945500 | -3.70117000 |
| C | 1.69294000  | -4.11130000 | -2.31318100 |
| C | 2.01417500  | 1.19704200  | -2.62304700 |
| C | 2.86934100  | 0.47692600  | -3.41888300 |
| C | 3.46211400  | -0.94319400 | -1.50728500 |
| C | 2.32134900  | 2.66330700  | 3.79608500  |
| C | -0.84518100 | 4.48557800  | -3.00410800 |
| C | 2.36572100  | 2.80992700  | 1.38379600  |
| C | 4.52929200  | -0.34702500 | 3.88413300  |
| C | 2.55883300  | -0.18608500 | -0.68837700 |
| C | -3.30480800 | -4.09793700 | 2.28458200  |
| C | -1.90658300 | -2.12377800 | 2.26448500  |
| C | 0.57312100  | 1.61436800  | 2.49441400  |
| C | 5.61245200  | 0.37480100  | 3.43687300  |
| C | 4.21183900  | -2.04035000 | -0.99773300 |
| C | -0.00033800 | 5.70940100  | -1.09986400 |
| C | 1.14599600  | 1.91117700  | 3.72971300  |
| H | -0.61065300 | -1.00377600 | -2.64226100 |
| H | 5.84372300  | -3.02401100 | -3.81738900 |
| H | -1.32997200 | -4.06218400 | -0.48326200 |
| H | -0.74169600 | 2.34700000  | -2.87175400 |
| H | 0.79467000  | 4.53590200  | 0.50895600  |
| H | 0.46433100  | -2.28150300 | 2.95440700  |
| H | 6.53929700  | 1.35063800  | 1.73623400  |
| H | -3.31780200 | -2.58152500 | 3.81973100  |
| H | 4.73200800  | 0.79424100  | 0.17276700  |
| H | 3.85014800  | 3.68578100  | 2.66737700  |
| H | -3.06992000 | -5.43215000 | 0.60416500  |
| H | 2.32154100  | -1.77943800 | 4.47370400  |

|   |             |             |             |          |             |             |             |
|---|-------------|-------------|-------------|----------|-------------|-------------|-------------|
| H | 5.60964600  | -3.60130100 | -1.40437700 | C        | -2.33936000 | 2.72704300  | 1.24831300  |
| H | 4.55900500  | -1.12477200 | -4.76297100 | H        | -3.14755800 | 3.12164100  | 1.87891700  |
| H | 1.54267200  | -3.80877300 | -0.18681100 | H        | -1.38794400 | 3.00107900  | 1.70826200  |
| H | 0.21311300  | -2.16265000 | -4.68367600 | H        | -2.39313200 | 3.22711300  | 0.27628900  |
| H | 2.34543300  | -4.97381500 | -2.21802100 |          |             |             |             |
| H | 1.47558600  | 2.03370000  | -3.04783600 | <b>6</b> |             |             |             |
| H | 2.99533300  | 0.74120500  | -4.46521400 |          |             |             |             |
| H | -1.31719900 | 4.46921300  | -3.98197500 | P        | -0.71009400 | -0.05461700 | -1.39382700 |
| H | 2.85546600  | 3.14092300  | 0.47334600  | P        | 0.71049900  | 0.77129400  | 1.51237100  |
| H | 4.46292800  | -0.66572300 | 4.92082900  | C        | 1.70769300  | 2.13569700  | 0.79569900  |
| H | -1.59847600 | -1.19275500 | 2.72353500  | C        | 2.41693500  | 1.95660500  | -0.39503900 |
| H | -0.32953900 | 1.01623800  | 2.43990800  | C        | -3.80346000 | 1.85542700  | 1.91180600  |
| H | 6.41578800  | 0.63554200  | 4.11959100  | C        | -1.02307900 | 1.35171800  | 1.69338100  |
| H | 4.11054900  | -2.31496300 | 0.04468700  | C        | 0.07195400  | 6.75362600  | -0.69707900 |
| H | 0.18777800  | 6.65002500  | -0.59063000 | C        | 0.01879000  | 4.55099500  | -1.72238500 |
| H | 0.67945100  | 1.54463100  | 4.63915100  | C        | 3.32379400  | 4.19049500  | -0.20484900 |
| H | 1.69962200  | -4.14456100 | -4.46806000 | C        | -0.22881600 | -0.70963100 | -3.03416000 |
| H | -4.07190700 | -4.70127900 | 2.76113000  | C        | 2.78653200  | 0.22712100  | 3.23532900  |
| H | 2.76866200  | 2.88937100  | 4.75942400  | C        | 1.12950800  | -0.64185200 | -3.39082600 |
| H | -0.86132300 | 6.63645900  | -2.84606700 | C        | 1.48010700  | 0.74218200  | 3.18172000  |
| C | -4.33098600 | -1.11920500 | -0.16153000 | C        | 0.67025800  | -1.82190400 | -5.44812900 |
| C | -5.65730900 | -0.54942300 | 0.27760100  | C        | -2.51846000 | -0.25634000 | -1.22890500 |
| C | -5.94046100 | 0.79485300  | -0.35810600 | C        | -1.12867600 | -1.34984200 | -3.89363000 |
| C | -5.11927600 | 1.36812900  | -1.25542400 | C        | -0.54406400 | 1.78070200  | -1.54850000 |
| C | -3.86009600 | 0.71233700  | -1.61528200 | C        | -1.65328900 | 2.09889800  | 0.70189400  |
| C | -3.70565400 | -0.67864200 | -1.31091100 | C        | -1.79044500 | 0.80499100  | 2.76270600  |
| H | -4.06366700 | -2.07187500 | 0.28231700  | C        | -5.10582900 | 3.38845000  | -0.04533900 |
| H | -6.85550100 | 1.28725700  | -0.03755100 | C        | -3.06022100 | 2.37306500  | 0.80303000  |
| H | -5.30669600 | 2.36033400  | -1.65716600 | C        | 1.64643400  | 1.30555000  | 5.53557500  |
| C | -6.76777500 | -1.54596800 | -0.10188500 | C        | -3.75765000 | 3.13610600  | -0.17352100 |
| H | -6.58327500 | -2.50826700 | 0.38582700  | C        | -4.77504700 | 0.24096900  | -1.95241400 |
| H | -7.73435400 | -1.15874500 | 0.23553300  | C        | 3.50566300  | 0.23477900  | 4.42786600  |
| H | -6.79909000 | -1.69165500 | -1.18529100 | C        | -3.13474000 | 1.05492400  | 2.87217100  |
| O | -5.69361400 | -0.47731300 | 1.70412500  | C        | -0.57906600 | 6.23259400  | 0.44731700  |
| C | -4.68520000 | 0.39254700  | 2.23510600  | C        | 0.36020900  | 5.92856700  | -1.76039200 |
| H | -5.09236800 | 1.41931200  | 2.28148600  | C        | 1.82550500  | 3.34686900  | 1.49525600  |
| O | -2.83523100 | 1.39014700  | -1.95143500 | C        | 3.21957900  | 2.98262800  | -0.89621600 |
| H | -2.83604900 | -1.20741700 | -1.71283900 | C        | 2.62654000  | 4.36957500  | 0.99325200  |
| C | -3.43729000 | 0.42127500  | 1.44307200  | C        | 0.04901500  | 2.33755600  | -2.71233500 |
| C | -2.53204200 | 1.24432700  | 1.09890700  | C        | 0.31713800  | 3.68166900  | -2.79900300 |
| H | -4.50762600 | 0.04818300  | 3.25923000  | C        | -0.63129200 | 4.01812400  | -0.56386100 |

|   |             |             |             |    |             |             |             |
|---|-------------|-------------|-------------|----|-------------|-------------|-------------|
| C | -5.28248300 | -0.46001800 | -0.85405200 | H  | 3.48823300  | 0.76804800  | 6.51897200  |
| C | 1.57507300  | -1.18269100 | -4.59472900 | H  | -6.35601300 | -0.52986000 | -0.70517500 |
| C | -3.39792200 | 0.35204600  | -2.13731300 | H  | 1.01606200  | -2.25258700 | -6.38327200 |
| C | -5.19216600 | 2.12735700  | 2.01379100  | Rh | 0.38743400  | -1.24174900 | 0.32549600  |
| C | -0.92057400 | 2.61780800  | -0.49742800 | C  | 0.40667100  | -2.71982700 | 2.07059600  |
| C | 2.93107600  | 0.76470900  | 5.58673800  | C  | 1.55526900  | -2.30578500 | 1.86380400  |
| C | 0.92457500  | 1.30290700  | 4.33874600  | C  | 4.33489300  | -1.12572200 | -0.76982200 |
| C | -3.03254300 | -0.95388100 | -0.13060000 | C  | 4.54602700  | -2.61115700 | -0.62276200 |
| C | -5.83281900 | 2.88315400  | 1.05782900  | C  | 5.18082300  | -3.24262700 | -1.83628000 |
| C | -0.92480600 | 4.90144700  | 0.51158100  | C  | 5.48166200  | -2.56337100 | -2.95178800 |
| C | -0.67656400 | -1.90698200 | -5.09343600 | C  | 5.20979500  | -1.11655500 | -3.06987300 |
| C | -4.40949900 | -1.05630300 | 0.05742300  | C  | 4.65038800  | -0.44354000 | -1.87896000 |
| H | 2.32429900  | 1.02280800  | -0.93629700 | H  | 3.88961100  | -0.62597700 | 0.08776500  |
| H | 0.34190100  | 7.80505200  | -0.73144500 | H  | 5.36055400  | -4.31312900 | -1.76423200 |
| H | 3.25269100  | -0.15344000 | 2.33097400  | H  | 5.91879800  | -3.04704200 | -3.82089800 |
| H | 1.84249600  | -0.16795000 | -2.72368800 | H  | 4.49345100  | 0.62690400  | -1.96188900 |
| H | -2.17825400 | -1.42199300 | -3.63215100 | C  | 5.38738400  | -2.89237600 | 0.62640600  |
| H | -1.30760000 | 0.17634300  | 3.50068300  | H  | 4.89731800  | -2.46646300 | 1.50829300  |
| H | -5.61772200 | 3.97374300  | -0.80365000 | H  | 5.49257900  | -3.97242200 | 0.76833800  |
| H | 1.20166000  | 1.74191600  | 6.42527400  | H  | 6.38169800  | -2.44734100 | 0.52490000  |
| H | -3.21916600 | 3.51867800  | -1.03174200 | O  | 3.27428500  | -3.25393300 | -0.36470400 |
| H | -5.45281600 | 0.71607300  | -2.65541200 | C  | 2.33117700  | -3.15658900 | -1.43398600 |
| H | 4.51443500  | -0.16721400 | 4.45134900  | H  | 2.33979100  | -4.08491900 | -2.02197600 |
| H | -3.70317100 | 0.63575800  | 3.69782800  | H  | 2.58990600  | -2.33696300 | -2.10860500 |
| H | -0.80221600 | 6.88885100  | 1.28351200  | C  | 0.96713900  | -2.94371200 | -0.92997500 |
| H | 0.85968900  | 6.31502000  | -2.64468300 | C  | -0.25754100 | -3.10089600 | -0.80423500 |
| H | 1.28735800  | 3.49259600  | 2.42614400  | C  | -1.58974100 | -3.68902000 | -1.00552600 |
| H | 3.75133700  | 2.84099000  | -1.83271800 | H  | -2.18299400 | -3.69146000 | -0.08955400 |
| H | 2.69939500  | 5.30930000  | 1.53228200  | H  | -2.14266400 | -3.12841800 | -1.76604800 |
| H | 0.30304300  | 1.69570200  | -3.54536300 | H  | -1.48040900 | -4.72393000 | -1.35149500 |
| H | 0.78024600  | 4.08995400  | -3.69309500 | O  | 5.41797000  | -0.50052500 | -4.11678400 |
| H | 2.62653800  | -1.11168900 | -4.85815100 | C  | -0.78168700 | -3.47170900 | 2.33538400  |
| H | -3.00762200 | 0.92083500  | -2.97586900 | C  | -0.76508400 | -4.86503100 | 2.12693000  |
| H | -5.73831500 | 1.72338700  | 2.86198200  | C  | -1.97294100 | -2.84799800 | 2.74753700  |
| H | -0.05837600 | 1.75707400  | 4.31637400  | C  | -1.92372300 | -5.61217500 | 2.32230600  |
| H | -2.34479900 | -1.39919200 | 0.57863800  | H  | 0.15327200  | -5.34152900 | 1.80022500  |
| H | -6.89593900 | 3.08816800  | 1.14349500  | C  | -3.12766600 | -3.60272200 | 2.93578700  |
| H | -1.41021200 | 4.51268600  | 1.39888600  | H  | -1.98745600 | -1.77680200 | 2.90134900  |
| H | -1.38304900 | -2.40524300 | -5.75102000 | C  | -3.10768700 | -4.98418500 | 2.72059300  |
| H | -4.79605500 | -1.59206200 | 0.91948800  | H  | -1.90534300 | -6.68507400 | 2.15569400  |
| H | 3.94389600  | 4.99084800  | -0.59774800 | H  | -4.04382100 | -3.11224500 | 3.25133800  |

H -4.01114400 -5.56934600 2.86450200  
H 2.60126300 -2.17756100 2.04527400

**7-ts**

P -1.34278700 -0.15752600 -1.29227200  
P 0.72926000 0.61169200 1.33410200  
C 1.81360400 1.72818000 0.36536500  
C 2.07233700 1.45428400 -0.98216900  
C -3.46113000 2.41650800 2.25846400  
C -0.85051300 1.48107400 1.68874400  
C 0.66036200 6.41636500 -1.37511400  
C 0.02829600 4.20966200 -2.17394700  
C 3.44720000 3.43241300 -1.14493600  
C -1.31001000 -1.04587100 -2.88565500  
C 2.41249800 -0.67061400 3.13295500  
C -0.06387300 -1.26015900 -3.50030000  
C 1.59901600 0.45563800 2.93491000  
C -1.11749300 -2.61982200 -5.19952900  
C -3.08878500 -0.10563600 -0.75254700  
C -2.45497900 -1.63828100 -3.43518100  
C -0.95250200 1.60570000 -1.65601300  
C -1.51880600 2.23702700 0.72754700  
C -1.50352800 1.14208900 2.91014200  
C -4.81431300 4.01808200 0.39146800  
C -2.83377300 2.74177100 1.01298600  
C 2.26833200 1.29908000 5.10874100  
C -3.55477100 3.54923200 0.09023300  
C -5.36208800 0.69147000 -1.01770800  
C 3.15565500 -0.80268800 4.30700100  
C -2.76883100 1.59475900 3.18419900  
C 0.20327500 6.07511700 -0.07902500  
C 0.57138800 5.50197600 -2.40007700  
C 2.39143500 2.86133100 0.95743100  
C 2.88326500 2.29995400 -1.73498400  
C 3.20141600 3.70932100 0.20216000  
C -0.52898900 1.98233500 -2.95779600  
C -0.06151200 3.24904600 -3.21103300  
C -0.43128000 3.85965900 -0.86381700  
C -5.72756300 0.05243400 0.17078600  
C 0.02908200 -2.03229900 -4.65578100

C -4.04784400 0.61982700 -1.47556700  
C -4.76472800 2.90452400 2.53510300  
C -0.94050500 2.54422600 -0.62195200  
C 3.08264100 0.17941800 5.29720300  
C 1.53177600 1.44102100 3.93239200  
C -3.46281100 -0.74654600 0.43707900  
C -5.42892600 3.69411000 1.62370800  
C -0.33117800 4.83104400 0.17021700  
C -2.35588200 -2.42230300 -4.58736900  
C -4.77735500 -0.66689000 0.89717100  
H 1.61171000 0.59309700 -1.44694400  
H 1.08209500 7.40084800 -1.55542200  
H 2.46668000 -1.43561000 2.36573200  
H 0.83379100 -0.82626400 -3.07129700  
H -3.42194100 -1.49394300 -2.96623200  
H -0.99151900 0.51482200 3.63144700  
H -5.34489500 4.63483200 -0.32810100  
H 2.20575700 2.06421900 5.87708100  
H -3.10601700 3.79441700 -0.86437100  
H -6.09759600 1.26085800 -1.57807400  
H 3.78559000 -1.67627800 4.44797600  
H -3.25477300 1.33076900 4.11946000  
H 0.28096400 6.80048100 0.72567500  
H 0.92025800 5.75037900 -3.39880200  
H 2.20960000 3.08966600 2.00150100  
H 3.06882800 2.07743100 -2.78117800  
H 3.63399300 4.59078600 0.66595300  
H -0.56862600 1.25862400 -3.76294600  
H 0.26022500 3.52369200 -4.21199200  
H 0.99648100 -2.18447100 -5.12563700  
H -3.76225000 1.13900300 -2.38555400  
H -5.22597400 2.64148800 3.48322100  
H 0.89971900 2.31293000 3.79779700  
H -2.72412300 -1.29137100 1.01902000  
H -6.42515300 4.06585900 1.84473200  
H -0.66755900 4.57607300 1.16865400  
H -3.24970400 -2.87716500 -5.00436800  
H -5.05289500 -1.15644500 1.82657300  
H 4.07606100 4.09591200 -1.73094300  
H 3.65481200 0.07220400 6.21416700  
H -6.74902900 0.12351000 0.53261900

|    |             |             |             |          |             |             |             |
|----|-------------|-------------|-------------|----------|-------------|-------------|-------------|
| H  | -1.04351400 | -3.23061500 | -6.09449300 |          |             |             |             |
| Rh | -0.16280700 | -1.35630000 | 0.44670900  | <b>8</b> |             |             |             |
| C  | -0.65337000 | -3.36489300 | 1.14526000  |          |             |             |             |
| C  | 0.01892600  | -2.64209200 | 1.99318900  | P        | 0.83766900  | -0.90986000 | 1.54468000  |
| C  | 4.78311000  | -0.48322200 | 0.46421400  | P        | -0.09791100 | 0.17553900  | -1.59528100 |
| C  | 4.77295600  | -1.97357000 | 0.23618600  | C        | 0.10949200  | 2.01135000  | -1.61094900 |
| C  | 5.48223400  | -2.38062600 | -1.02970100 | C        | -0.37449800 | 2.77531400  | -0.54081300 |
| C  | 6.09936600  | -1.51073000 | -1.84116500 | C        | 4.22940900  | -1.59036800 | -1.82215900 |
| C  | 6.10813700  | -0.05848500 | -1.56162400 | C        | 1.63153100  | -0.46945400 | -1.65178800 |
| C  | 5.41292500  | 0.38526600  | -0.33769200 | C        | 3.93115300  | 5.01164900  | -0.16233500 |
| H  | 4.25385300  | -0.14066100 | 1.34851100  | C        | 2.62597300  | 3.37537700  | 1.07198800  |
| H  | 5.47164300  | -3.44601700 | -1.25085600 | C        | 0.40143300  | 4.80488200  | -1.59159300 |
| H  | 6.61292600  | -1.83151000 | -2.74347000 | C        | 0.77794900  | -1.30153800 | 3.34383000  |
| H  | 5.41037400  | 1.45233000  | -0.13921000 | C        | 0.02320200  | -0.06924100 | -4.42230300 |
| C  | 5.41682400  | -2.67407800 | 1.44147700  | C        | 1.54832500  | -0.67764800 | 4.33321600  |
| H  | 4.88000200  | -2.40360100 | 2.35614400  | C        | -0.77880900 | -0.16120100 | -3.27091200 |
| H  | 5.36921100  | -3.75938000 | 1.30852100  | C        | 0.71054400  | -2.23086400 | 5.99507100  |
| H  | 6.46311000  | -2.37131100 | 1.54250900  | C        | 2.07982800  | -2.19274000 | 1.10507600  |
| O  | 3.40866800  | -2.46311400 | 0.21744800  | C        | -0.00219800 | -2.41770600 | 3.69345400  |
| C  | 2.64888300  | -2.05957700 | -0.92964400 | C        | 1.63757000  | 0.73773800  | 1.36521900  |
| H  | 2.92181000  | -2.66631400 | -1.80569700 | C        | 2.64134500  | 0.02640000  | -0.82222900 |
| H  | 2.84869200  | -1.01193300 | -1.16498700 | C        | 1.90903800  | -1.55794800 | -2.52378800 |
| C  | 1.21783500  | -2.28809900 | -0.63129100 | C        | 6.28273800  | -0.63715000 | -0.16189100 |
| C  | 0.29463100  | -3.19053900 | -0.74429900 | C        | 3.96533300  | -0.52178000 | -0.90820900 |
| C  | -0.18968400 | -4.24067900 | -1.66695700 | C        | -2.70123300 | -0.59982400 | -4.69049900 |
| H  | -0.36570000 | -5.19388000 | -1.16214800 | C        | 5.02926700  | -0.07338700 | -0.07675300 |
| H  | -1.12247300 | -3.93307400 | -2.15120800 | C        | 4.23671600  | -3.22051600 | 1.51129100  |
| H  | 0.56331900  | -4.38563300 | -2.45038600 | C        | -0.53490500 | -0.23953000 | -5.68850300 |
| O  | 6.65680200  | 0.74089800  | -2.32180300 | C        | 3.16772800  | -2.09376400 | -2.61237100 |
| C  | -1.62722700 | -4.43395500 | 1.00452100  | C        | 4.18960800  | 4.04478600  | -1.16256900 |
| C  | -1.42288500 | -5.65134400 | 1.67799100  | C        | 3.15780400  | 4.68294300  | 0.92829600  |
| C  | -2.78065400 | -4.26530500 | 0.21989900  | C        | 0.74316000  | 2.66775000  | -2.67573400 |
| C  | -2.36734200 | -6.67181300 | 1.57916500  | C        | -0.23344400 | 4.16070500  | -0.52964600 |
| H  | -0.52324900 | -5.78662000 | 2.27093700  | C        | 0.88758400  | 4.05423600  | -2.66429700 |
| C  | -3.72002900 | -5.28919300 | 0.12553500  | C        | 1.31361600  | 1.75312000  | 2.31093900  |
| H  | -2.93083800 | -3.32996300 | -0.30854400 | C        | 1.80161100  | 3.02864400  | 2.17255700  |
| C  | -3.51679100 | -6.49456000 | 0.80378900  | C        | 2.89711000  | 2.38917600  | 0.06996900  |
| H  | -2.20288500 | -7.60863500 | 2.10385500  | C        | 3.89122500  | -4.27995700 | 0.66477800  |
| H  | -4.61118600 | -5.14693600 | -0.47908700 | C        | 1.50669100  | -1.13747800 | 5.65208500  |
| H  | -4.24857300 | -7.29337800 | 0.72566900  | C        | 3.33391900  | -2.18670500 | 1.73853700  |
| H  | 0.28489300  | -2.63632400 | 3.04169100  | C        | 5.53019100  | -2.15529000 | -1.88394500 |

|   |             |             |             |    |             |             |             |
|---|-------------|-------------|-------------|----|-------------|-------------|-------------|
| C | 2.37429900  | 1.06300300  | 0.22494900  | C  | -4.66227700 | -2.77781700 | -0.21791200 |
| C | -1.89911000 | -0.50498700 | -5.82769600 | C  | -4.23959500 | -3.27455000 | -1.57314400 |
| C | -2.14526000 | -0.42767100 | -3.42239100 | C  | -2.97703100 | -3.23086000 | -2.02232300 |
| C | 1.73592200  | -3.25132500 | 0.26079600  | C  | -1.85163500 | -2.70281000 | -1.23006900 |
| C | 6.54003200  | -1.68787300 | -1.07401800 | C  | -2.13361100 | -2.07039000 | 0.10748100  |
| C | 3.67803800  | 2.77070300  | -1.05512900 | H  | -3.78122100 | -1.77610300 | 1.46406500  |
| C | -0.03902300 | -2.87742600 | 5.00860100  | H  | -5.03106700 | -3.69723400 | -2.18976200 |
| C | 2.64243800  | -4.29408100 | 0.04568800  | H  | -2.70641300 | -3.62045700 | -2.99994300 |
| H | -0.86434800 | 2.29230700  | 0.29721100  | C  | -5.03786200 | -3.94317000 | 0.68905600  |
| H | 4.33729000  | 6.01390200  | -0.26294500 | H  | -5.40916500 | -3.55966900 | 1.64539700  |
| H | 1.08759400  | 0.11590800  | -4.34133900 | H  | -5.81980400 | -4.55835100 | 0.23123400  |
| H | 2.19387800  | 0.15650100  | 4.08489700  | H  | -4.16360200 | -4.57613300 | 0.87443800  |
| H | -0.57247000 | -2.93835700 | 2.92669400  | O  | -5.83500600 | -1.94667800 | -0.36716200 |
| H | 1.10756400  | -1.98830600 | -3.10664400 | C  | -5.42695200 | -0.61338700 | -0.72149600 |
| H | 7.07934200  | -0.27815200 | 0.48330900  | H  | -5.52153400 | -0.45786800 | -1.80712000 |
| H | -3.76217900 | -0.81387900 | -4.78243100 | O  | -0.70568000 | -2.83711500 | -1.66560100 |
| H | 4.84777600  | 0.71842700  | 0.63905300  | C  | -3.99047500 | -0.50169500 | -0.25920100 |
| H | 5.21149900  | -3.19881300 | 1.98943700  | C  | -3.06036900 | 0.44368600  | -0.43871600 |
| H | 0.10146100  | -0.16894600 | -6.56582200 | H  | -6.11418500 | 0.07968300  | -0.22173200 |
| H | 3.35914000  | -2.92985700 | -3.27925200 | C  | -3.33679600 | 1.74998700  | -1.12547700 |
| H | 4.78740900  | 4.31409800  | -2.02841100 | H  | -3.09308300 | 2.60728700  | -0.49090600 |
| H | 2.93948300  | 5.41888500  | 1.69751100  | H  | -2.74263600 | 1.86172800  | -2.03966100 |
| H | 1.13500600  | 2.10591000  | -3.51447500 | H  | -4.39618100 | 1.83578700  | -1.40340800 |
| H | -0.61444200 | 4.73029700  | 0.31184200  | Rh | -1.25808100 | -0.19635300 | 0.40830100  |
| H | 1.39028000  | 4.54687400  | -3.49135700 | C  | -4.95248800 | 3.66128400  | 1.83964600  |
| H | 0.67370900  | 1.51609700  | 3.15284300  | C  | -4.45505200 | 2.36884600  | 1.96261300  |
| H | 1.56067100  | 3.78972000  | 2.90983800  | C  | -3.09217800 | 2.16997900  | 2.26249400  |
| H | 2.10721300  | -0.64163400 | 6.40940800  | C  | -2.24214800 | 3.27982300  | 2.44420400  |
| H | 3.60610800  | -1.37145500 | 2.40101100  | C  | -2.75137000 | 4.56793300  | 2.31585300  |
| H | 5.70815500  | -2.96987600 | -2.58072700 | C  | -4.10291800 | 4.75943200  | 2.01097100  |
| H | -2.77615000 | -0.50794900 | -2.54815900 | H  | -6.00115400 | 3.81552200  | 1.60536100  |
| H | 0.78249000  | -3.24115100 | -0.25355100 | H  | -5.09787100 | 1.50780300  | 1.81924500  |
| H | 7.53208000  | -2.12682300 | -1.12623800 | H  | -1.19407000 | 3.11728400  | 2.67091400  |
| H | 3.87012900  | 2.04424000  | -1.83555400 | H  | -2.09649300 | 5.42285300  | 2.45252100  |
| H | -0.64877200 | -3.74002800 | 5.26124800  | H  | -4.49561300 | 5.76668600  | 1.90877700  |
| H | 2.37145600  | -5.10906600 | -0.61980300 | C  | -2.57499900 | 0.85518000  | 2.38522600  |
| H | 0.52247400  | 5.88401400  | -1.58202900 | C  | -2.10706300 | -0.27980300 | 2.51466300  |
| H | -2.33033400 | -0.64062100 | -6.81536500 | H  | -1.91971700 | -1.15419100 | 3.10524800  |
| H | 4.59708500  | -5.08707400 | 0.49026800  | H  | -1.66244900 | -2.69585700 | 0.87296400  |
| H | 0.68156800  | -2.58450900 | 7.02145800  |    |             |             |             |
| C | -3.61405000 | -1.81339300 | 0.38031700  |    |             |             |             |

**9-ts**

|   |             |             |             |   |             |             |             |
|---|-------------|-------------|-------------|---|-------------|-------------|-------------|
| P | 0.82857800  | -0.89597100 | 1.53498700  | C | -1.93140500 | -0.42612900 | -3.47566000 |
| P | 0.03717400  | 0.26197600  | -1.60163700 | C | 1.79915100  | -3.19595100 | 0.23136900  |
| C | 0.20486000  | 2.10090000  | -1.55121400 | C | 6.63625300  | -1.64537800 | -0.82059200 |
| C | -0.41406600 | 2.82323500  | -0.52128300 | C | 3.79893500  | 2.83839000  | -0.84530100 |
| C | 4.37488600  | -1.49612700 | -1.70051400 | C | -0.30576600 | -2.68990800 | 5.03057100  |
| C | 1.77998300  | -0.35227000 | -1.64058700 | C | 2.72028900  | -4.22805100 | 0.03010000  |
| C | 3.94778400  | 5.07880100  | 0.07088700  | H | -0.96742700 | 2.30780500  | 0.25476500  |
| C | 2.57898800  | 3.41696700  | 1.19834300  | H | 4.34423200  | 6.08776200  | 0.00457000  |
| C | 0.40691200  | 4.90219300  | -1.43699100 | H | 1.24241100  | 0.43678600  | -4.34762600 |
| C | 0.67960000  | -1.25551800 | 3.33275200  | H | 2.20821100  | 0.09593700  | 4.05205200  |
| C | 0.19852000  | 0.16236800  | -4.44559200 | H | -0.83237000 | -2.74861000 | 2.94710900  |
| C | 1.49252300  | -0.67424600 | 4.31600200  | H | 1.33614300  | -1.79307600 | -3.19819700 |
| C | -0.59578500 | -0.03960800 | -3.30417700 | H | 7.09676600  | -0.29355500 | 0.81171900  |
| C | 0.49285100  | -2.09077600 | 6.00768800  | H | -3.50242400 | -0.90935900 | -4.86110100 |
| C | 2.08784000  | -2.17051200 | 1.13512900  | H | 4.86749200  | 0.72112500  | 0.87148800  |
| C | -0.21159100 | -2.27568500 | 3.70236700  | H | 5.16551100  | -3.20468600 | 2.16310000  |
| C | 1.61563200  | 0.76299900  | 1.40601700  | H | 0.29508700  | 0.14171100  | -6.59173700 |
| C | 2.74466800  | 0.09749800  | -0.73605000 | H | 3.58367200  | -2.75933000 | -3.26693100 |
| C | 2.10255000  | -1.40186500 | -2.54396700 | H | 4.96023700  | 4.40079600  | -1.72300900 |
| C | 6.33573500  | -0.62280700 | 0.11015600  | H | 2.81095800  | 5.46341600  | 1.85028100  |
| C | 4.06681800  | -0.45919000 | -0.76419900 | H | 1.44713400  | 2.27213000  | -3.31427300 |
| C | -2.46572900 | -0.60385400 | -4.75235900 | H | -0.80541700 | 4.75086400  | 0.34239400  |
| C | 5.08410100  | -0.04919700 | 0.14170500  | H | 1.61411100  | 4.71977400  | -3.21584600 |
| C | 4.22089000  | -3.20978400 | 1.62752000  | H | 0.53725700  | 1.50622400  | 3.14330000  |
| C | -0.33545900 | -0.01526000 | -5.72136000 | H | 1.38653900  | 3.80076400  | 2.96355000  |
| C | 3.35888100  | -1.95118700 | -2.57624600 | H | 2.02595300  | -0.62466600 | 6.39825400  |
| C | 4.29926000  | 4.11985400  | -0.90833000 | H | 3.53503700  | -1.39728500 | 2.54773300  |
| C | 3.09835400  | 4.73374800  | 1.09810700  | H | 5.88394900  | -2.86540800 | -2.41785600 |
| C | 0.93574400  | 2.80350300  | -2.52049000 | H | -2.55729900 | -0.59421600 | -2.61012800 |
| C | -0.31851900 | 4.21261900  | -0.46537700 | H | 0.87906600  | -3.16633700 | -0.33854300 |
| C | 1.03456600  | 4.19258400  | -2.46371400 | H | 7.62542000  | -2.09382400 | -0.82944100 |
| C | 1.21872100  | 1.76359800  | 2.34053000  | H | 4.06285500  | 2.11834300  | -1.61032500 |
| C | 1.68899800  | 3.04903600  | 2.23961500  | H | -1.00177600 | -3.47879600 | 5.30049600  |
| C | 2.93804900  | 2.44108600  | 0.21419200  | H | 2.49195900  | -5.01670100 | -0.68144100 |
| C | 3.93000700  | -4.23660000 | 0.72271900  | H | 0.49076400  | 5.98402500  | -1.39173200 |
| C | 1.39303900  | -1.08692300 | 5.64614800  | H | -2.08248200 | -0.53819000 | -6.87426700 |
| C | 3.30275900  | -2.18650300 | 1.84078600  | H | 4.64770500  | -5.03565700 | 0.56006000  |
| C | 5.67184600  | -2.07347700 | -1.70461600 | H | 0.41804100  | -2.40901300 | 7.04339400  |
| C | 2.41888200  | 1.10850200  | 0.31883200  | C | -3.50221000 | -1.94973000 | 0.29508900  |
| C | -1.66971000 | -0.39771800 | -5.87940400 | C | -4.50804200 | -2.96802700 | -0.30176200 |
|   |             |             |             | C | -4.02448100 | -3.52602700 | -1.61256900 |



|               |             |             |             |   |             |             |             |
|---------------|-------------|-------------|-------------|---|-------------|-------------|-------------|
| C             | -2.77097700 | -3.39583800 | -2.06776800 | C | 0.25229500  | 2.13133000  | -1.47600100 |
| C             | -1.68776900 | -2.75066200 | -1.30120400 | C | -0.37140900 | 2.83366200  | -0.43948500 |
| C             | -2.01154700 | -2.15811000 | 0.04767200  | C | 4.42037600  | -1.31048300 | -1.94050300 |
| H             | -3.67653500 | -1.88870200 | 1.37689200  | C | 1.78827800  | -0.26248700 | -1.74990800 |
| H             | -4.77555500 | -4.04577400 | -2.20482500 | C | 4.02060400  | 4.96647900  | 0.36817400  |
| H             | -2.46964000 | -3.80506100 | -3.02845100 | C | 2.60535900  | 3.26535700  | 1.37396000  |
| C             | -4.91154000 | -4.08033700 | 0.65530900  | C | 0.57924800  | 4.90461700  | -1.23721100 |
| H             | -5.32879900 | -3.64678000 | 1.57027100  | C | 0.67791800  | -1.48644200 | 3.26056300  |
| H             | -5.66482600 | -4.73090400 | 0.19880200  | C | -1.21472900 | 1.26998800  | -3.98605000 |
| H             | -4.03921800 | -4.68873700 | 0.91593700  | C | 1.48602900  | -0.94515300 | 4.27123000  |
| O             | -5.68165200 | -2.16416800 | -0.56300800 | C | -0.72147400 | 0.14020800  | -3.30959200 |
| C             | -5.23872900 | -0.89222500 | -1.05172000 | C | 0.46973800  | -2.41713700 | 5.90415400  |
| H             | -5.13408600 | -0.90748500 | -2.14808200 | C | 2.13508500  | -2.25656400 | 1.01308200  |
| O             | -0.54597300 | -2.77690200 | -1.76236300 | C | -0.22361600 | -2.51196000 | 3.58936200  |
| C             | -3.91537400 | -0.66146200 | -0.36617800 | C | 1.60640600  | 0.61945200  | 1.42476600  |
| C             | -3.08485900 | 0.40014200  | -0.39327900 | C | 2.73343700  | 0.08236800  | -0.77535500 |
| H             | -5.99827700 | -0.14598000 | -0.79507900 | C | 2.16921300  | -1.11375700 | -2.82000300 |
| C             | -3.38282800 | 1.65266300  | -1.16446500 | C | 6.33768500  | -0.65123300 | 0.00083600  |
| H             | -3.09796300 | 2.55874600  | -0.62601000 | C | 4.06867600  | -0.43614500 | -0.86398800 |
| H             | -2.82374300 | 1.65920400  | -2.10681200 | C | -1.55158200 | -1.24396300 | -5.13379100 |
| H             | -4.44965400 | 1.73101900  | -1.40901700 | C | 5.06749100  | -0.13065500 | 0.10274800  |
| Rh            | -1.18951800 | -0.27193100 | 0.40386600  | C | 4.30396600  | -3.24774900 | 1.44241800  |
| C             | -5.64488300 | 3.31706400  | 1.70783200  | C | -1.86615700 | 1.14172300  | -5.21356700 |
| C             | -4.97868300 | 2.09990900  | 1.61263700  | C | 3.44046000  | -1.62452600 | -2.91187700 |
| C             | -3.59368600 | 2.03890100  | 1.84513400  | C | 4.36098800  | 4.06382500  | -0.66601200 |
| C             | -2.88428600 | 3.21429400  | 2.15760500  | C | 3.15180600  | 4.57491800  | 1.36190300  |
| C             | -3.55795500 | 4.43104900  | 2.24133700  | C | 1.05507500  | 2.83130600  | -2.38977000 |
| C             | -4.93596900 | 4.48371700  | 2.01553800  | C | -0.21205000 | 4.21333600  | -0.31931700 |
| H             | -6.71566100 | 3.36127000  | 1.53357900  | C | 1.21198000  | 4.21050700  | -2.27269000 |
| H             | -5.51293400 | 1.19277100  | 1.35058200  | C | 1.21240800  | 1.57215500  | 2.40942900  |
| H             | -1.81366200 | 3.16011500  | 2.32799400  | C | 1.69932900  | 2.85430300  | 2.38485700  |
| H             | -3.00883600 | 5.33654400  | 2.48144300  | C | 2.95358200  | 2.34389800  | 0.33445700  |
| H             | -5.45870400 | 5.43359300  | 2.07704200  | C | 4.09941000  | -4.15315500 | 0.39699600  |
| C             | -2.87595300 | 0.79441700  | 1.77234200  | C | 1.37728400  | -1.40575300 | 5.58452300  |
| C             | -2.13781100 | -0.12653200 | 2.24510900  | C | 3.32714000  | -2.30586800 | 1.75369200  |
| H             | -1.90505800 | -0.55870500 | 3.20575300  | C | 5.73482500  | -1.84372600 | -2.01199300 |
| H             | -1.55069500 | -2.79789000 | 0.80591900  | C | 2.41243200  | 1.01291900  | 0.35676800  |
| <b>9-ts-1</b> |             |             |             | C | -2.03569900 | -0.11480400 | -5.79526600 |
| P             | 0.83300000  | -1.04631600 | 1.48046800  | C | -0.90987600 | -1.12144700 | -3.90083700 |
| P             | 0.02753000  | 0.31452700  | -1.62731100 | C | 1.92704800  | -3.16912500 | -0.02390200 |
|               |             |             |             | C | 6.67794900  | -1.51924600 | -1.06418500 |

|   |             |             |             |               |             |             |             |
|---|-------------|-------------|-------------|---------------|-------------|-------------|-------------|
| C | 3.83164200  | 2.79265900  | -0.69029200 | H             | -3.80176400 | -1.85828000 | 1.40392800  |
| C | -0.32760100 | -2.97346000 | 4.90144400  | H             | -4.98350000 | -3.73447500 | -2.30958400 |
| C | 2.90948700  | -4.11385600 | -0.32942500 | H             | -2.64736400 | -3.61718400 | -3.07905100 |
| H | -0.97370200 | 2.29736200  | 0.28418800  | C             | -5.07513600 | -4.01435400 | 0.56995500  |
| H | 4.43982500  | 5.96838800  | 0.37082100  | H             | -5.47641100 | -3.63279900 | 1.51480200  |
| H | -1.09761100 | 2.25837800  | -3.56149200 | H             | -5.84544000 | -4.61813900 | 0.07888900  |
| H | 2.20624700  | -0.16834800 | 4.04094600  | H             | -4.21400100 | -4.65614200 | 0.78285000  |
| H | -0.84911500 | -2.95243300 | 2.81897700  | O             | -5.80401400 | -1.99393200 | -0.49950400 |
| H | 1.45235600  | -1.36000200 | -3.59060900 | C             | -5.32100300 | -0.72121800 | -0.94925200 |
| H | 7.08253200  | -0.40455100 | 0.75187000  | H             | -5.27017000 | -0.68601300 | -2.04824200 |
| H | -1.67559500 | -2.23025600 | -5.57196500 | O             | -0.67177200 | -3.06568500 | -1.59623900 |
| H | 4.81905100  | 0.51458900  | 0.93623900  | C             | -3.95791900 | -0.58746300 | -0.31644100 |
| H | 5.23024400  | -3.26756600 | 2.00894600  | C             | -3.06867600 | 0.42414600  | -0.36542700 |
| H | -2.23820100 | 2.03158600  | -5.71328700 | H             | -6.02679000 | 0.04779800  | -0.61617700 |
| H | 3.70783300  | -2.27609100 | -3.73935500 | C             | -3.34856000 | 1.69581900  | -1.11047700 |
| H | 5.03557600  | 4.38061200  | -1.45603900 | H             | -2.84667800 | 1.67702000  | -2.08278000 |
| H | 2.87159000  | 5.26034500  | 2.15722900  | H             | -4.42231000 | 1.82395600  | -1.29570800 |
| H | 1.55873800  | 2.29738200  | -3.18987800 | H             | -2.99549900 | 2.58432200  | -0.58368100 |
| H | -0.70031500 | 4.74164600  | 0.49406300  | Rh            | -1.19239400 | -0.31710000 | 0.38983700  |
| H | 1.84078100  | 4.74236000  | -2.98039500 | C             | -5.45869500 | 3.41411800  | 1.84867500  |
| H | 0.52355600  | 1.27688400  | 3.19245000  | C             | -4.85528100 | 2.17013000  | 1.69793700  |
| H | 1.40299200  | 3.56802900  | 3.14867000  | C             | -3.47634200 | 2.02734100  | 1.93123200  |
| H | 2.00830700  | -0.97440500 | 6.35629500  | C             | -2.70955600 | 3.14878400  | 2.30194400  |
| H | 3.50048600  | -1.60546100 | 2.56313900  | C             | -3.32043900 | 4.39314000  | 2.44115200  |
| H | 5.97851100  | -2.51193200 | -2.83356400 | C             | -4.69277800 | 4.52692800  | 2.21412000  |
| H | -0.56594000 | -2.01600300 | -3.40081400 | H             | -6.52491900 | 3.52161700  | 1.67409900  |
| H | 1.01025100  | -3.12448400 | -0.59646200 | H             | -5.43389600 | 1.30446300  | 1.39314600  |
| H | 7.68187000  | -1.92886700 | -1.12746300 | H             | -1.64398200 | 3.03205800  | 2.47175800  |
| H | 4.08737400  | 2.12159100  | -1.50041300 | H             | -2.72723600 | 5.25687800  | 2.72615100  |
| H | -1.03140300 | -3.76604900 | 5.13839100  | H             | -5.16671700 | 5.49824800  | 2.32031200  |
| H | 2.74388700  | -4.81210000 | -1.14530000 | C             | -2.82146000 | 0.75306800  | 1.81274500  |
| H | 0.71264600  | 5.97821500  | -1.14247400 | C             | -2.09646600 | -0.19865000 | 2.24419800  |
| H | -2.54019600 | -0.21321200 | -6.75211200 | H             | -1.86464800 | -0.67859900 | 3.18212000  |
| H | 4.86601700  | -4.88314300 | 0.15335100  | H             | -1.69047600 | -2.80841300 | 0.86734500  |
| H | 0.38730500  | -2.77304100 | 6.92693500  |               |             |             |             |
| C | -3.60866000 | -1.90080700 | 0.32461700  |               |             |             |             |
| C | -4.65519100 | -2.85047400 | -0.31494900 |               |             |             |             |
| C | -4.20428400 | -3.32283900 | -1.67064400 |               |             |             |             |
| C | -2.93678000 | -3.24986700 | -2.09849700 |               |             |             |             |
| C | -1.82399300 | -2.81225600 | -1.23481700 |               |             |             |             |
| C | -2.12890700 | -2.17893800 | 0.09039800  |               |             |             |             |
|   |             |             |             | <b>9-ts-2</b> |             |             |             |
|   |             |             |             | C             | -3.54818200 | -1.81898500 | 0.73076200  |
|   |             |             |             | C             | -4.49506500 | -3.00517900 | 0.40963300  |
|   |             |             |             | C             | -3.89142500 | -3.94176500 | -0.60015500 |
|   |             |             |             | C             | -2.59616400 | -3.93768200 | -0.94085400 |

|    |             |             |             |   |             |             |             |
|----|-------------|-------------|-------------|---|-------------|-------------|-------------|
| C  | -1.58905000 | -3.06181200 | -0.31103600 | C | 3.13559200  | 2.21788600  | -0.66133800 |
| C  | -2.03793200 | -2.04460700 | 0.70623400  | C | -0.62487500 | 1.71309700  | 5.28923900  |
| H  | -3.82861900 | -1.41435200 | 1.71184600  | C | 3.91481400  | 2.08988100  | -1.84501000 |
| H  | -4.58415800 | -4.64120400 | -1.06448000 | C | 1.15338600  | 3.08827100  | -3.68197200 |
| H  | -2.19938800 | -4.63063600 | -1.67793700 | C | 0.40381700  | -0.36075800 | 5.95368400  |
| C  | -4.98505400 | -3.76058200 | 1.63664400  | C | 2.23105000  | 3.65670700  | 1.09790700  |
| H  | -5.49810500 | -3.07069800 | 2.31475700  | C | 6.32559700  | -0.73724500 | 0.49139600  |
| H  | -5.68100600 | -4.55600400 | 1.35051900  | C | 5.60944400  | -2.73706800 | -0.65804400 |
| H  | -4.13823200 | -4.21293600 | 2.16297400  | C | 3.20946200  | -1.21100600 | 2.69194300  |
| O  | -5.63870800 | -2.36244200 | -0.19943300 | C | 2.63236700  | -3.81190000 | 1.85893800  |
| C  | -5.14866400 | -1.30673200 | -1.03391200 | C | 4.12611800  | -2.23311000 | 2.91879400  |
| H  | -4.93333000 | -1.67440800 | -2.05017300 | C | 2.08284100  | -2.29211800 | -1.77750800 |
| O  | -0.40324200 | -3.24180500 | -0.58963300 | C | 3.31074700  | -2.86303100 | -1.56570800 |
| C  | -3.90170000 | -0.82521500 | -0.34063700 | C | 4.06045100  | -0.83883300 | -0.40448100 |
| C  | -3.08446500 | 0.21627600  | -0.61573400 | C | 0.58695900  | 4.11100500  | -2.91920500 |
| H  | -5.92714900 | -0.54017000 | -1.11047200 | C | -0.11732100 | -1.99660500 | -5.34418200 |
| C  | -3.30974200 | 1.15732600  | -1.76316200 | C | 1.00995300  | 1.75717000  | -3.29154200 |
| H  | -4.36413900 | 1.18051100  | -2.06620700 | C | 3.59462500  | 4.63844100  | -0.72117000 |
| H  | -3.00625700 | 2.18004600  | -1.53136000 | C | 2.75916600  | -0.26480700 | -0.61698900 |
| H  | -2.72052200 | 0.84136700  | -2.63137200 | C | -0.26750700 | 0.81324900  | 6.29458800  |
| Rh | -1.24077500 | -0.11843800 | 0.44228200  | C | -0.30630500 | 1.44297200  | 3.95862900  |
| P  | 0.08432200  | -0.31820000 | -1.56220400 | C | -0.27750500 | 2.46338400  | -1.37873800 |
| P  | 0.76386100  | -0.14882200 | 1.83757500  | C | 4.34718000  | 4.47676100  | -1.86189300 |
| C  | 1.99337800  | -1.48632300 | 2.04434000  | C | 5.09300500  | -0.15439600 | 0.29490000  |
| C  | 1.70680800  | -2.79004800 | 1.63198800  | C | -2.30460600 | -2.19904600 | -4.34548600 |
| C  | 2.98169900  | 3.52158800  | -0.09411000 | C | -0.13434200 | 3.79396700  | -1.76676800 |
| C  | 1.74585200  | 1.26477300  | 1.12382200  | H | 0.79092200  | -2.99346200 | 1.09217100  |
| C  | 6.58987400  | -2.04199700 | 0.01343400  | H | 7.56367300  | -2.49281000 | 0.18163900  |
| C  | 4.33439500  | -2.15697000 | -0.88648900 | H | 1.26326700  | -1.54199500 | 4.39143100  |
| C  | 3.84003000  | -3.53669200 | 2.50021000  | H | 1.40748700  | -1.11913800 | -4.12556100 |
| C  | -0.49241600 | -1.17999000 | -3.08440500 | H | -2.49481700 | -1.45124900 | -2.34527200 |
| C  | 0.73858000  | -0.62428700 | 4.62407600  | H | 1.11655500  | 2.70908100  | 2.61926700  |
| C  | 0.36078300  | -1.39510600 | -4.18106600 | H | 5.09739400  | 3.06716900  | -3.32953700 |
| C  | 0.40673700  | 0.28185300  | 3.60248600  | H | -1.16496500 | 2.62319300  | 5.53367100  |
| C  | -1.45257900 | -2.39896800 | -5.43142100 | H | 4.03204100  | 1.11298500  | -2.29781300 |
| C  | 0.29665000  | 1.42695500  | -2.13131700 | H | 1.72168700  | 3.32597700  | -4.57631500 |
| C  | -1.82642700 | -1.59385400 | -3.18203400 | H | 0.67603200  | -1.07824000 | 6.72237500  |
| C  | 1.79298500  | -0.97386600 | -1.32464500 | H | 2.13879500  | 4.63817900  | 1.55536200  |
| C  | 2.50316600  | 1.09040000  | -0.03885000 | H | 7.09851000  | -0.19396300 | 1.02742800  |
| C  | 1.64234000  | 2.56525500  | 1.68834600  | H | 5.79356900  | -3.74289200 | -1.02602300 |
| C  | 4.50876400  | 3.18799900  | -2.42480500 | H | 3.43728000  | -0.19934600 | 3.01327800  |

|   |             |             |             |    |             |             |             |
|---|-------------|-------------|-------------|----|-------------|-------------|-------------|
| H | 2.41083100  | -4.81991200 | 1.51974500  | H  | -4.56253800 | -1.48633700 | 1.01669600  |
| H | 5.06971400  | -2.01147600 | 3.40815300  | H  | -3.33692400 | -4.36224100 | -1.96777500 |
| H | 1.31409700  | -2.86354600 | -2.27624700 | H  | -1.21703900 | -4.69001500 | -0.69506000 |
| H | 3.51003700  | -3.87310000 | -1.91335100 | C  | -5.25940100 | -3.87150500 | 0.26338300  |
| H | 0.55774100  | -2.15626500 | -6.18000900 | H  | -6.12906000 | -3.27488400 | 0.55847700  |
| H | 1.46947600  | 0.98064200  | -3.89051100 | H  | -5.59945300 | -4.70837500 | -0.35562900 |
| H | 3.46065600  | 5.62102900  | -0.27672300 | H  | -4.78142000 | -4.27587200 | 1.16117800  |
| H | -0.64534800 | 2.13513200  | 3.19876400  | O  | -4.98229400 | -2.40561200 | -1.60475600 |
| H | -0.83980800 | 2.24829600  | -0.47596400 | C  | -4.21841900 | -1.27696200 | -2.03107000 |
| H | 4.81711200  | 5.33453400  | -2.33415800 | H  | -3.42716400 | -1.58126500 | -2.72947000 |
| H | 4.90471400  | 0.83780800  | 0.68521500  | O  | -1.06272400 | -3.85204600 | 1.79836600  |
| H | -3.34162300 | -2.51826000 | -4.39569600 | H  | -2.62237200 | -1.80429600 | 2.19432500  |
| H | -0.58409000 | 4.57941800  | -1.16640200 | C  | -3.65781200 | -0.68665300 | -0.75431200 |
| H | 4.56135600  | -4.33094000 | 2.66976300  | C  | -3.43402700 | 0.64390100  | -0.57402100 |
| H | -0.51938200 | 1.02059700  | 7.33048100  | H  | -4.89403000 | -0.59879200 | -2.55822200 |
| H | 0.70817400  | 5.14742000  | -3.22020000 | C  | -3.62613600 | 1.63126400  | -1.70358500 |
| H | -1.82186000 | -2.87091000 | -6.33734400 | H  | -4.67052700 | 1.96595100  | -1.74658900 |
| C | -5.73773700 | 3.67040200  | 0.32873200  | H  | -3.00480800 | 2.51809100  | -1.55693200 |
| C | -5.10928100 | 2.46323300  | 0.61808700  | H  | -3.37468800 | 1.19539800  | -2.67206600 |
| C | -3.74139900 | 2.44416000  | 0.93816500  | Rh | -1.12601500 | -0.75368100 | 0.15850900  |
| C | -3.00689100 | 3.64413900  | 0.93927700  | P  | 0.15303800  | 0.52423200  | -1.55683300 |
| C | -3.64003500 | 4.84743200  | 0.63433400  | P  | 0.70296800  | -0.84150900 | 1.50805500  |
| C | -5.00399800 | 4.86177400  | 0.33053400  | C  | 1.76919100  | -2.20980000 | 0.94065100  |
| H | -6.79744800 | 3.68460700  | 0.09259100  | C  | 1.39814900  | -2.90820300 | -0.21665200 |
| H | -5.66217700 | 1.52959000  | 0.59729600  | C  | 2.66407200  | 3.39164700  | 1.19845000  |
| H | -1.94651100 | 3.62039600  | 1.17122800  | C  | 1.56191500  | 0.78380500  | 1.34789200  |
| H | -3.07044200 | 5.77193500  | 0.63328400  | C  | 6.51160300  | -1.97505700 | -0.81074000 |
| H | -5.49595000 | 5.80021900  | 0.09231100  | C  | 4.38206400  | -1.43608700 | -1.85026000 |
| C | -3.06695700 | 1.21078900  | 1.26163400  | C  | 3.31094200  | -4.35877200 | 0.03144200  |
| C | -2.38126200 | 0.49198700  | 2.06160200  | C  | -0.65396900 | 0.10888600  | -3.14882400 |
| H | -2.26355100 | 0.35045400  | 3.12299600  | C  | -0.38969200 | -1.73656400 | 3.96921000  |
| H | -1.64288100 | -2.34493900 | 1.68170700  | C  | -0.95121600 | -1.24123500 | -3.40263200 |

## 10

|   |             |             |             |   |             |             |             |
|---|-------------|-------------|-------------|---|-------------|-------------|-------------|
| C | -3.76268700 | -1.78127000 | 0.32772400  | C | -1.02022200 | 1.07574300  | -4.09436900 |
| C | -4.27614700 | -2.99342500 | -0.50450300 | C | 1.87607400  | -0.11958400 | -1.75554800 |
| C | -3.13719800 | -3.83269400 | -1.03792600 | C | 2.48268500  | 1.07269100  | 0.34756600  |
| C | -1.98886700 | -3.99862700 | -0.36714200 | C | 1.14947300  | 1.81299000  | 2.24633700  |
| C | -1.79993900 | -3.33971500 | 0.94728400  | C | 4.59574900  | 3.98320100  | -0.75021700 |
| C | -2.48880800 | -2.04305600 | 1.14322400  | C | 3.07786100  | 2.37922900  | 0.27646400  |

|   |             |             |             |              |             |             |             |
|---|-------------|-------------|-------------|--------------|-------------|-------------|-------------|
| C | 1.72703500  | -0.72626900 | 5.48591600  | H            | 4.57005200  | -3.96762300 | 1.73843200  |
| C | 4.05258100  | 2.71799800  | -0.70139000 | H            | 1.52041100  | -1.09478400 | -3.66323800 |
| C | 1.35789700  | 4.35622800  | -2.41020800 | H            | 3.69242800  | -2.22366100 | -3.74245900 |
| C | -0.37222100 | -1.91042700 | 5.35445700  | H            | -1.78785800 | -2.66874200 | -4.77677400 |
| C | 1.67592500  | 3.07594200  | 2.16542900  | H            | 1.82772900  | 2.37736000  | -3.11246900 |
| C | 6.20714800  | -1.10369700 | 0.26361000  | H            | 2.89947400  | 5.44647400  | 1.82015200  |
| C | 5.61819400  | -2.13466800 | -1.84585700 | H            | 2.52621600  | -0.00557900 | 3.63368900  |
| C | 2.90907700  | -2.60689100 | 1.65198100  | H            | -1.09486800 | 2.61890000  | 0.03335500  |
| C | 2.16504700  | -3.97713400 | -0.67127200 | H            | 4.61426600  | 5.97578200  | 0.10768200  |
| C | 3.67914100  | -3.67448100 | 1.19161900  | H            | 4.78536600  | 0.24384500  | 1.11939900  |
| C | 2.22323100  | -0.95079100 | -2.85272200 | H            | -1.94786600 | 1.45544200  | -5.99695300 |
| C | 3.44166400  | -1.58587700 | -2.89913500 | H            | -0.87176800 | 5.08195200  | 0.06164400  |
| C | 4.06854000  | -0.56185400 | -0.76095000 | H            | 3.91500000  | -5.18814300 | -0.32425100 |
| C | 0.60392300  | 5.12070000  | -1.51424900 | H            | 0.69056100  | -1.54006300 | 7.19378300  |
| C | -1.57436700 | -1.62016300 | -4.59082900 | H            | 0.71658800  | 6.20077000  | -1.49653800 |
| C | 1.22694500  | 2.96940500  | -2.42899200 | H            | -2.43335300 | -0.94081200 | -6.44932400 |
| C | 3.23204300  | 4.68903000  | 1.11572800  | C            | -5.75638700 | 3.66398200  | 1.64588300  |
| C | 2.80330200  | 0.09879600  | -0.73775700 | C            | -5.10041400 | 2.55413400  | 1.11376100  |
| C | 0.68003500  | -1.40282400 | 6.11639300  | C            | -3.72257000 | 2.36859400  | 1.31832000  |
| C | 1.70975600  | -0.54076600 | 4.10505900  | C            | -3.01938100 | 3.33068800  | 2.06659100  |
| C | -0.41934400 | 3.10637600  | -0.65490700 | C            | -3.67750500 | 4.43589400  | 2.60317500  |
| C | 4.18316600  | 4.98056300  | 0.16365400  | C            | -5.04864300 | 4.60877800  | 2.39325600  |
| C | 5.01672800  | -0.41270800 | 0.28795100  | H            | -5.66020500 | 1.81726400  | 0.54460500  |
| C | -1.66368200 | 0.69580800  | -5.27463000 | H            | -1.94874400 | 3.21535400  | 2.20853600  |
| C | -0.28635400 | 4.49541600  | -0.64041700 | H            | -3.11702900 | 5.17032400  | 3.17525100  |
| H | 0.51252900  | -2.60431200 | -0.76948300 | H            | -5.55953000 | 5.47476700  | 2.80431900  |
| H | 7.45261900  | -2.51724400 | -0.81323900 | C            | -3.02255400 | 1.19479100  | 0.75055300  |
| H | -1.17334600 | -2.19267300 | 3.38563800  | C            | -1.93806300 | 0.62338700  | 1.29789100  |
| H | -0.68623700 | -2.00361800 | -2.67383400 | H            | -1.54783400 | 0.87490900  | 2.27981100  |
| H | -0.81069800 | 2.12355800  | -3.91232200 | H            | -6.82265900 | 3.78941900  | 1.47892200  |
| H | 0.41852500  | 1.59607200  | 3.01512600  |              |             |             |             |
| H | 5.34163700  | 4.21950400  | -1.50341300 | <b>11-ts</b> |             |             |             |
| H | 2.55811900  | -0.33806800 | 6.06731800  | C            | 4.27281500  | -0.45937000 | -0.08857000 |
| H | 4.37035900  | 1.97121000  | -1.41813300 | C            | 4.82563800  | -1.42283100 | -1.17047600 |
| H | 2.05921600  | 4.83962100  | -3.08360200 | C            | 3.86916800  | -1.60463900 | -2.32009900 |
| H | -1.18258200 | -2.45191200 | 5.83382600  | C            | 2.93445300  | -0.70447100 | -2.64756000 |
| H | 1.34559600  | 3.84953900  | 2.85296200  | C            | 2.77956000  | 0.57472400  | -1.92315300 |
| H | 6.91754500  | -0.98611200 | 1.07669300  | C            | 3.36756400  | 0.67264800  | -0.54179000 |
| H | 5.84166900  | -2.80086600 | -2.67478300 | H            | 5.12278800  | -0.04201600 | 0.46386100  |
| H | 3.20009400  | -2.08697800 | 2.55771500  | H            | 4.01480900  | -2.50400800 | -2.91350700 |
| H | 1.87429000  | -4.50551600 | -1.57424600 |              |             |             |             |

|    |             |             |             |   |             |             |             |
|----|-------------|-------------|-------------|---|-------------|-------------|-------------|
| H  | 2.31798400  | -0.82013600 | -3.53441400 | C | -2.47523400 | -3.49502600 | 3.16192100  |
| C  | 6.20259000  | -1.02138600 | -1.68852000 | C | 1.46560900  | 5.08982300  | -0.46056900 |
| H  | 6.91132600  | -0.97403500 | -0.85500200 | C | -2.35434400 | 1.28408900  | 3.13352200  |
| H  | 6.56730200  | -1.75002700 | -2.41977100 | C | -5.65322800 | 0.98177100  | -2.30373600 |
| H  | 6.15289800  | -0.04040900 | -2.17163900 | C | -4.95106200 | -0.85559500 | -3.71278400 |
| O  | 4.97591100  | -2.67045800 | -0.46772300 | C | -1.89863900 | 2.25017500  | -2.47710400 |
| C  | 3.86452000  | -2.81701300 | 0.42230600  | C | -1.01487200 | 0.30911800  | -4.27914000 |
| H  | 3.02728200  | -3.31368900 | -0.07743900 | C | -2.40833500 | 2.21929200  | -3.77418600 |
| O  | 2.32210400  | 1.56310400  | -2.51003600 | C | -2.01247900 | -2.52383100 | -2.13212700 |
| H  | 3.81996900  | 1.65664400  | -0.43708000 | C | -3.04355800 | -2.26885000 | -3.00377600 |
| C  | 3.52302300  | -1.40854700 | 0.83920800  | C | -3.77830100 | -0.39974300 | -1.59720600 |
| C  | 2.99929200  | -1.00497200 | 2.04167500  | C | -2.00930400 | -2.76325600 | 4.25947900  |
| H  | 4.18730200  | -3.44398500 | 1.25915000  | C | 1.73192500  | -4.65937500 | -2.22667000 |
| C  | 2.66583800  | -2.02800800 | 3.10201100  | C | -1.95911400 | -3.25381000 | 1.89068200  |
| H  | 2.09049700  | -1.59863900 | 3.92182500  | C | -4.35485200 | 0.07736800  | 3.94585400  |
| H  | 2.09340700  | -2.85483900 | 2.67308800  | C | -2.71603000 | -0.69580200 | -0.68752300 |
| H  | 3.58927300  | -2.45031900 | 3.51829300  | C | 0.47414400  | 5.92408500  | 0.05848200  |
| Rh | 1.34116600  | -0.15821800 | 0.20388900  | C | -0.97230700 | 4.00530200  | 0.34935500  |
| P  | -0.29388800 | -1.91997500 | 0.04957100  | C | -0.50729400 | -1.54811500 | 2.81069200  |
| P  | -0.26811200 | 1.35145400  | -0.37137400 | C | -5.37071900 | -0.82779600 | 3.73284100  |
| C  | -0.95097200 | 1.29961700  | -2.07044900 | C | -4.67285900 | 0.68504800  | -1.38395200 |
| C  | -0.50661500 | 0.33551000  | -2.98199400 | C | 1.34809000  | -5.70776500 | -0.08398500 |
| C  | -3.43233900 | 0.38813200  | 2.91450800  | C | -1.02516700 | -1.79015000 | 4.08275300  |
| C  | -1.61115600 | 0.99428800  | 0.83326000  | H | 0.21990100  | -0.40253000 | -2.66526400 |
| C  | -5.79466300 | 0.20711900  | -3.48083600 | H | -6.57090800 | 0.45579100  | -4.19856200 |
| C  | -3.92897900 | -1.18559800 | -2.78415600 | H | 1.99584500  | 3.08365700  | -1.02913100 |
| C  | -1.96831500 | 1.24901000  | -4.67710400 | H | 0.96146100  | -2.66631300 | -2.44938200 |
| C  | 0.48736000  | -3.47823900 | -0.50542400 | H | 0.23525600  | -4.55837700 | 1.35042300  |
| C  | 1.24587400  | 3.71601800  | -0.56992900 | H | -0.64028200 | 2.24314600  | 2.32639700  |
| C  | 1.05026500  | -3.52420800 | -1.79218000 | H | -6.29058400 | -2.18624300 | 2.31583400  |
| C  | 0.03092500  | 3.15582400  | -0.14764400 | H | -1.53519000 | 6.01990700  | 0.84056700  |
| C  | 1.88545700  | -5.75411000 | -1.37111300 | H | -4.71355900 | -1.69210100 | 0.50569500  |
| C  | -0.96327500 | -2.28093700 | 1.71114000  | H | -3.25148700 | -4.24255800 | 3.29561900  |
| C  | 0.64884900  | -4.57853900 | 0.34906800  | H | 2.41321500  | 5.50698000  | -0.78956100 |
| C  | -1.81469700 | -1.72046600 | -0.97894700 | H | -2.23345800 | 1.73227900  | 4.11590900  |
| C  | -2.61790400 | 0.06642200  | 0.59617400  | H | -6.32118400 | 1.82032700  | -2.12960500 |
| C  | -1.46675600 | 1.56991400  | 2.13005900  | H | -5.04904200 | -1.45692100 | -4.61256900 |
| C  | -5.49521500 | -1.46424400 | 2.47635800  | H | -2.24581200 | 3.00883200  | -1.78430400 |
| C  | -3.56024600 | -0.24443600 | 1.63717800  | H | -0.67156000 | -0.45037900 | -4.97556800 |
| C  | -0.74902700 | 5.37858700  | 0.45259300  | H | -3.15359000 | 2.94900300  | -4.07603300 |
| C  | -4.61098900 | -1.18486900 | 1.45693200  | H | -1.34188900 | -3.34895700 | -2.33448400 |

|   |             |             |             |    |             |             |             |
|---|-------------|-------------|-------------|----|-------------|-------------|-------------|
| H | -3.18002200 | -2.88952900 | -3.88518200 | H  | -6.54073900 | -2.83495800 | 0.50227000  |
| H | 2.15318300  | -4.68357400 | -3.22736000 | H  | -6.07139000 | -3.24409700 | 2.16879800  |
| H | -2.33521400 | -3.81079800 | 1.03756600  | H  | -6.36279200 | -1.54875800 | 1.72548400  |
| H | -4.23768100 | 0.56504200  | 4.90993700  | O  | -4.03988800 | -3.62744000 | 0.46845600  |
| H | -1.93047000 | 3.60375000  | 0.65732500  | C  | -3.18867000 | -3.46034700 | -0.66982900 |
| H | 0.23450800  | -0.77369100 | 2.65452300  | H  | -2.21065700 | -3.90451200 | -0.48404800 |
| H | -6.07213200 | -1.06071400 | 4.52864400  | O  | -3.33313800 | 1.53602800  | 1.94300200  |
| H | -4.56500300 | 1.29214900  | -0.49245300 | H  | -4.98069400 | 0.65863800  | 0.07697300  |
| H | 1.46942500  | -6.55160500 | 0.58895900  | C  | -3.13101000 | -1.99046900 | -0.94807700 |
| H | -0.67216600 | -1.20682700 | 4.92818800  | C  | -2.52257700 | -1.37957800 | -2.02591000 |
| H | -2.36799600 | 1.22496900  | -5.68670700 | H  | -3.63939900 | -3.98870200 | -1.52436100 |
| H | 0.64845800  | 6.99273200  | 0.14519800  | C  | -1.88041200 | -2.23430400 | -3.09006200 |
| H | -2.42285800 | -2.94585100 | 5.24696400  | H  | -1.23587800 | -1.67061700 | -3.75943400 |
| H | 2.42700500  | -6.63423500 | -1.70497600 | H  | -1.28683700 | -3.02953700 | -2.63012400 |
| C | 2.86034100  | 0.45052900  | 2.29283200  | H  | -2.66143300 | -2.71470300 | -3.69420300 |
| C | 2.47281200  | 1.18560400  | 1.20144100  | Rh | -1.19735000 | -0.34326500 | -0.48840400 |
| H | 2.39201400  | 2.26506800  | 1.19870700  | P  | 0.69146600  | -1.81135700 | -0.17956700 |
| C | 2.98599500  | 1.02509500  | 3.64749100  | P  | 0.15730300  | 1.45749100  | 0.08539200  |
| C | 3.91679800  | 0.51053000  | 4.56737800  | C  | 0.55275000  | 1.51621300  | 1.87601200  |
| C | 2.18005800  | 2.11020100  | 4.03940200  | C  | 0.02505400  | 0.54120600  | 2.72852700  |
| C | 4.04090500  | 1.06847400  | 5.83883200  | C  | 3.92348400  | 0.88323000  | -2.60895500 |
| H | 4.55733500  | -0.31664000 | 4.27773700  | C  | 1.71438100  | 1.26798500  | -0.87572200 |
| C | 2.30761400  | 2.66739600  | 5.30971500  | C  | 5.18444900  | 1.20245600  | 4.07767500  |
| H | 1.44218300  | 2.50337200  | 3.34636500  | C  | 3.67261400  | -0.46550400 | 3.16199100  |
| C | 3.23711700  | 2.14746800  | 6.21509600  | C  | 1.03999200  | 1.63457100  | 4.62848200  |
| H | 4.76944700  | 0.66262800  | 6.53493000  | C  | 0.11277900  | -3.46068200 | 0.36668400  |
| H | 1.67451700  | 3.50211800  | 5.59700100  | C  | -1.59380000 | 3.62613300  | 0.27557200  |
| H | 3.33246600  | 2.57840700  | 7.20751500  | C  | -0.68825500 | -3.51419200 | 1.52153200  |

## 12

|   |             |             |             |   |             |             |             |
|---|-------------|-------------|-------------|---|-------------|-------------|-------------|
| C | -4.26798700 | -1.36388500 | -0.18255900 | C | 0.35674800  | -4.64041900 | -0.34848800 |
| C | -4.49264600 | -2.35138500 | 0.97612600  | C | 1.98853700  | -1.35707800 | 1.06391700  |
| C | -3.67852200 | -1.99492100 | 2.18919100  | C | 2.78325000  | 0.49166500  | -0.44321400 |
| C | -3.24893900 | -0.75257400 | 2.45759000  | C | 1.71516900  | 1.79527600  | -2.20035800 |
| C | -3.50898300 | 0.38146700  | 1.56242300  | C | 6.10925900  | -0.66444600 | -1.76878000 |
| C | -4.03026100 | 0.11181700  | 0.14412600  | C | 3.91806700  | 0.29551900  | -1.30438600 |
| H | -5.14306000 | -1.43369100 | -0.84388000 | C | 0.16724000  | 5.52351800  | -0.76341300 |
| H | -3.50164200 | -2.80727100 | 2.89002500  | C | 5.03881300  | -0.48998700 | -0.91879600 |
| H | -2.73170500 | -0.51579200 | 3.38296600  | C | 3.53339800  | -3.08710300 | -2.86730300 |
| C | -5.96116000 | -2.50332200 | 1.37018000  | C | -1.98357300 | 4.96117700  | 0.17281100  |

|   |             |             |             |           |             |             |             |
|---|-------------|-------------|-------------|-----------|-------------|-------------|-------------|
| C | 2.78815500  | 1.61874600  | -3.03405200 | H         | 3.10431400  | -3.40173000 | -0.78263300 |
| C | 5.14119100  | 1.91018900  | 2.85179100  | H         | 5.02039200  | 1.13391100  | -4.45221500 |
| C | 4.46687100  | 0.03727000  | 4.22622800  | H         | 1.56570300  | 3.91415700  | -0.96498600 |
| C | 1.31436200  | 2.56456700  | 2.41237600  | H         | 0.45115400  | -0.74106600 | -2.86345300 |
| C | 0.26791600  | 0.59775500  | 4.10025000  | H         | 6.96210900  | -0.22143900 | -3.71425000 |
| C | 1.56176700  | 2.61708800  | 3.78271000  | H         | 4.34584100  | 2.00302700  | 0.87235000  |
| C | 2.09902200  | -2.08638600 | 2.27725400  | H         | 0.01173200  | -6.76038700 | -0.47177900 |
| C | 2.91908400  | -1.65718100 | 3.29240500  | H         | 1.75187400  | -1.06753300 | -4.95230500 |
| C | 3.61987900  | 0.25141600  | 1.92443600  | H         | 1.23551700  | 1.67769500  | 5.69600200  |
| C | 3.15391100  | -2.43375900 | -4.04400300 | H         | -1.41742500 | 6.95096300  | -0.44304900 |
| C | -1.20629100 | -4.72681200 | 1.96892600  | H         | 3.73863900  | -2.56553300 | -4.94968400 |
| C | 2.79354500  | -2.91068000 | -1.69985800 | H         | -1.36684500 | -6.84565000 | 1.59523800  |
| C | 5.03784100  | 0.68315200  | -3.46353500 | C         | -2.62088900 | 0.08659800  | -2.05888100 |
| C | 2.77438500  | -0.22079300 | 0.87178100  | C         | -3.05805000 | 0.71987400  | -0.86383500 |
| C | -1.11013300 | 5.91257300  | -0.35844700 | C         | -2.29910100 | 0.87157300  | -3.27925400 |
| C | 0.56315800  | 4.18844200  | -0.66147500 | C         | -2.65973900 | 0.38856000  | -4.54774700 |
| C | 1.29395300  | -1.42110800 | -2.88118700 | C         | -1.69969400 | 2.13843400  | -3.19518200 |
| C | 6.11356000  | -0.07223100 | -3.05292700 | C         | -2.39583000 | 1.13593400  | -5.69709400 |
| C | 4.38176300  | 1.44595700  | 1.80137000  | H         | -3.16775500 | -0.56468100 | -4.64119000 |
| C | -0.17937700 | -5.85321000 | 0.09417200  | C         | -1.43164000 | 2.88179000  | -4.34147000 |
| C | 2.03608700  | -1.59845100 | -4.04841400 | H         | -1.43082200 | 2.54090600  | -2.22829000 |
| H | -0.56161400 | -0.26743800 | 2.30595300  | C         | -1.77142200 | 2.38025200  | -5.60117600 |
| H | 5.78528400  | 1.58320900  | 4.89842800  | H         | -2.68446600 | 0.74264100  | -6.66759400 |
| H | -2.27444800 | 2.90927500  | 0.72076200  | H         | -0.95512500 | 3.85352200  | -4.24636100 |
| H | -0.91804300 | -2.60217000 | 2.06301000  | H         | -1.56000500 | 2.95756200  | -6.49653800 |
| H | 0.95434500  | -4.61949700 | -1.25215600 | H         | -3.05395800 | 1.80207500  | -0.87297600 |
| H | 0.84915300  | 2.33501000  | -2.56074000 |           |             |             |             |
| H | 6.95451700  | -1.26883400 | -1.45252700 | <b>13</b> |             |             |             |
| H | 0.86502300  | 6.25801100  | -1.15536900 |           |             |             |             |
| H | 5.04717000  | -0.96232900 | 0.05560300  | O         | 3.24335000  | -1.74955800 | -0.05497600 |
| H | 4.41487000  | -3.72123300 | -2.85579300 | O         | 0.90095900  | 2.91440600  | -0.84681200 |
| H | -2.97165700 | 5.25661400  | 0.51438800  | C         | 2.86221200  | 1.62156900  | -0.99715700 |
| H | 2.77225500  | 2.02970100  | -4.03981100 | H         | 3.21336100  | 2.27370200  | -1.79338500 |
| H | 5.70779700  | 2.83042100  | 2.74303700  | C         | 1.07867200  | 1.15779700  | 0.79845000  |
| H | 4.49138700  | -0.51543600 | 5.16150500  | H         | 1.42794200  | 1.71430600  | 1.67889300  |
| H | 1.71743000  | 3.33382700  | 1.76191600  | C         | 1.66201200  | -0.25659800 | 0.83553700  |
| H | -0.13771200 | -0.17009800 | 4.75277200  | H         | 1.49786900  | -0.67790000 | 1.83844100  |
| H | 2.16650900  | 3.42199200  | 4.18947800  | C         | 1.55823400  | 1.97597700  | -0.41037400 |
| H | 1.52644800  | -2.99439800 | 2.41305000  | C         | -0.43149500 | 1.07143300  | 0.81534400  |
| H | 2.98584700  | -2.22391300 | 4.21720200  | H         | -0.98938700 | 1.86361900  | 1.30372300  |
| H | -1.82149300 | -4.75263300 | 2.86296900  | C         | 0.99010400  | -1.13182400 | -0.19524400 |



|   |             |             |             |    |             |             |             |
|---|-------------|-------------|-------------|----|-------------|-------------|-------------|
| C | 3.15209200  | -0.40869200 | 0.47989100  | H  | 6.55902700  | 2.03041100  | 2.48763700  |
| C | -1.08207600 | 0.05969400  | 0.20242000  | H  | 5.45164500  | 0.65394000  | 2.68237400  |
| C | -0.30915700 | -0.99949500 | -0.50676400 | O  | 5.42850500  | 2.93582400  | 0.22331900  |
| C | 2.04158300  | -2.03469600 | -0.78555300 | C  | 4.42688800  | 3.28800300  | -0.73824300 |
| H | 1.82933100  | -3.10298000 | -0.66331000 | H  | 3.90935200  | 4.21644300  | -0.44744300 |
| H | 2.18463900  | -1.84018300 | -1.86024800 | O  | 0.94762000  | 1.33053300  | 2.67553000  |
| C | 3.57795400  | 0.55990000  | -0.59623600 | C  | 3.48938000  | 2.10966500  | -0.75270300 |
| H | 4.53514400  | 0.33558700  | -1.06429300 | C  | 2.42969800  | 1.82633500  | -1.54091000 |
| C | 4.09469300  | -0.32940700 | 1.67441300  | H  | 4.92239300  | 3.46347100  | -1.69899600 |
| H | 3.82623200  | -1.09801700 | 2.40669900  | C  | 1.96661000  | 2.71306700  | -2.65962900 |
| H | 4.02430200  | 0.65451600  | 2.14992000  | H  | 2.75278900  | 3.42047700  | -2.95338400 |
| H | 5.13211600  | -0.48947600 | 1.36219400  | H  | 1.68185500  | 2.13861600  | -3.54689600 |
| C | -2.56804700 | 0.02591600  | 0.19650100  | H  | 1.08697900  | 3.29388000  | -2.36283800 |
| C | -0.97147900 | -1.82866900 | -1.57818400 | Rh | 1.27356100  | 0.26800000  | -0.59328700 |
| H | -0.22491500 | -2.32948600 | -2.20256900 | P  | -0.62122400 | 1.71482700  | -0.11701400 |
| H | -1.59552000 | -1.20487000 | -2.22870800 | P  | -0.11082000 | -1.70584300 | 0.04100700  |
| H | -1.62676300 | -2.60230000 | -1.16040500 | C  | -0.71168800 | -2.15080900 | 1.70664700  |
| C | -3.30385800 | 1.17262200  | -0.14439800 | C  | -0.14338000 | -1.55416300 | 2.83633900  |
| H | -2.77070700 | 2.07009800  | -0.44452100 | C  | -3.87938200 | -1.03149800 | -2.70540900 |
| C | -3.26944800 | -1.13719400 | 0.55676900  | C  | -1.66025700 | -1.48562800 | -0.97961000 |
| H | -2.71673900 | -2.02878400 | 0.83810500  | C  | -5.28417000 | -1.56120900 | 3.79664800  |
| C | -4.69903300 | 1.16028700  | -0.11940300 | C  | -3.55777900 | 0.00284500  | 3.10214100  |
| H | -5.25044400 | 2.05636000  | -0.39125900 | C  | -1.56438300 | -2.89480400 | 4.26509700  |
| C | -4.66377000 | -1.14999800 | 0.58263100  | C  | -0.43991200 | 3.46999200  | 0.41160500  |
| H | -5.18853500 | -2.05652700 | 0.87197400  | C  | 1.11077300  | -3.37415000 | -1.88464200 |
| C | -5.38431500 | -0.00145800 | 0.24344700  | C  | -1.54586400 | 4.21408500  | 0.86117200  |
| H | -6.47061900 | -0.01340200 | 0.25926300  | C  | 0.58027100  | -3.30044300 | -0.58517200 |

#### 14-ts

|   |            |            |            |   |             |             |             |
|---|------------|------------|------------|---|-------------|-------------|-------------|
| C | 3.84704600 | 1.20980300 | 0.39131500 | C | -1.84806100 | 1.05318800  | 1.09511600  |
| C | 4.79903700 | 2.10671400 | 1.22569300 | C | -2.69379200 | -0.64245800 | -0.56617000 |
| C | 4.03231700 | 2.99928800 | 2.16253400 | C | -1.76154400 | -2.12228000 | -2.24767000 |
| C | 2.75467300 | 2.79071100 | 2.50488100 | C | -5.94959200 | 0.68110200  | -1.89458300 |
| C | 1.99239100 | 1.59979400 | 2.08296700 | C | -3.82053000 | -0.40505800 | -1.42167800 |
| C | 2.56863300 | 0.68940900 | 1.03405300 | C | 1.26778300  | -5.60579500 | -0.23102100 |
| H | 4.42925400 | 0.36102100 | 0.01126700 | C | -4.88772800 | 0.45842100  | -1.04717400 |
| H | 4.58283600 | 3.85009700 | 2.55933300 | C | -3.28483800 | 2.78575600  | -3.11211300 |
| H | 2.23457700 | 3.44677200 | 3.19718200 | C | 1.69335800  | -4.54915100 | -2.35461500 |
| C | 5.89398100 | 1.34255500 | 1.95524800 | C | -2.82863700 | -1.90072800 | -3.08260900 |
| H | 6.48473800 | 0.76725400 | 1.23474400 | C | -5.32163300 | -2.09256900 | 2.48614800  |

|   |             |             |             |   |             |             |             |
|---|-------------|-------------|-------------|---|-------------|-------------|-------------|
| C | -4.41459400 | -0.53694300 | 4.09691700  | H | 0.30404200  | -4.40461600 | 1.25343600  |
| C | -1.71113500 | -3.12565600 | 1.86320500  | H | -0.08725700 | 0.63056800  | -2.77450300 |
| C | -0.57466400 | -1.92363600 | 4.11244200  | H | -6.84013600 | 0.25269000  | -3.82706600 |
| C | -2.12978600 | -3.49797700 | 3.13742600  | H | -4.51618500 | -2.03504900 | 0.51474300  |
| C | -1.84285400 | 1.57721700  | 2.41928100  | H | 1.91183700  | 5.93416200  | 0.54629400  |
| C | -2.66229100 | 1.06267400  | 3.38997800  | H | -1.20378500 | 0.82542600  | -4.95568000 |
| C | -3.58506000 | -0.53586100 | 1.77809800  | H | -1.90269600 | -3.17778300 | 5.25775100  |
| C | -2.76791400 | 2.12138900  | -4.22610100 | H | 2.24507100  | -6.58183600 | -1.88816400 |
| C | -1.40778300 | 5.56194300  | 1.18616300  | H | -3.26213300 | 2.20668100  | -5.18937100 |
| C | -2.65906800 | 2.66970600  | -1.87184100 | H | -0.05896000 | 7.24076000  | 1.32801700  |
| C | -4.98127400 | -0.77495600 | -3.56320000 | C | 4.31846100  | -3.76510100 | 0.72464600  |
| C | -2.69090500 | -0.00855300 | 0.78447700  | C | 3.50633700  | -2.69507300 | 0.35691900  |
| C | 1.77749500  | -5.67036500 | -1.52748200 | C | 3.66726500  | -2.07466100 | -0.89285100 |
| C | 0.67446900  | -4.43251100 | 0.23715100  | C | 4.67982100  | -2.54223500 | -1.75726400 |
| C | -0.98766600 | 1.23223200  | -2.85524600 | C | 5.49180300  | -3.60755200 | -1.38277900 |
| C | -5.99917500 | 0.06208200  | -3.16670200 | C | 5.31242300  | -4.22649500 | -0.14118200 |
| C | -4.48834600 | -1.60050600 | 1.50604800  | H | 4.17188000  | -4.24102700 | 1.68985400  |
| C | 0.93823600  | 5.46019500  | 0.63116300  | H | 2.73337900  | -2.34723500 | 1.03136400  |
| C | -1.61405900 | 1.34652500  | -4.09544200 | H | 4.81735400  | -2.05931300 | -2.72022600 |
| H | 0.58588900  | -0.76320400 | 2.71859300  | H | 6.26579100  | -3.95741400 | -2.06002700 |
| H | -5.93956300 | -1.96561600 | 4.56263000  | C | 2.87355400  | -0.94016400 | -1.30701500 |
| H | 1.10098400  | -2.50302400 | -2.52861100 | C | 2.74577500  | -0.02797300 | -2.19989800 |
| H | -2.51375900 | 3.74076200  | 0.97933100  | H | 2.83292200  | 0.24441900  | -3.24170800 |
| H | 1.66094100  | 3.55174600  | -0.03096800 | H | 2.68984900  | -0.29929800 | 1.48003400  |
| H | -0.99842000 | -2.81635600 | -2.56605100 | H | 5.94507700  | -5.06017100 | 0.14911300  |
| H | -6.75233600 | 1.34590200  | -1.58917800 |   |             |             |             |
| H | 1.33590000  | -6.46723000 | 0.42712200  |   |             |             |             |
| H | -4.85655700 | 0.95360200  | -0.08445900 |   |             |             |             |
| H | -4.18621600 | 3.38423600  | -3.20342300 | C | -3.88500700 | -1.04196000 | 0.32142100  |
| H | 2.09971700  | -4.57899100 | -3.36123900 | C | -4.97452200 | -1.77728200 | 1.13817100  |
| H | -2.87929900 | -2.40338200 | -4.04472600 | C | -4.37413500 | -2.66018300 | 2.19685100  |
| H | -6.00452400 | -2.90473800 | 2.25415000  | C | -3.09229700 | -2.59929900 | 2.58356500  |
| H | -4.37088400 | -0.12056100 | 5.09977200  | C | -2.12067100 | -1.63261000 | 2.04143500  |
| H | -2.16286300 | -3.58592100 | 0.99018700  | C | -2.59176100 | -0.63464100 | 1.01091500  |
| H | -0.14313200 | -1.44054600 | 4.98448800  | H | -4.34346400 | -0.15972800 | -0.13928600 |
| H | -2.91047500 | -4.24379100 | 3.25067200  | H | -5.05073600 | -3.38800100 | 2.64082800  |
| H | -1.16274700 | 2.37554700  | 2.67418600  | H | -2.69474400 | -3.26640200 | 3.34376500  |
| H | -2.63297000 | 1.46695900  | 4.39816100  | C | -6.03644400 | -0.85889200 | 1.72721200  |
| H | -2.27242600 | 6.11970600  | 1.53409900  | H | -6.80236600 | -1.43756000 | 2.25397700  |
| H | -3.08471300 | 3.18073500  | -1.01702600 | H | -5.58090100 | -0.15998700 | 2.43647200  |
| H | -5.00335500 | -1.25619900 | -4.53722300 | H | -6.51723700 | -0.29041000 | 0.92431100  |

**14-ts-1**

|    |             |             |             |   |             |             |             |
|----|-------------|-------------|-------------|---|-------------|-------------|-------------|
| O  | -5.61596600 | -2.61847000 | 0.15301700  | C | 0.90272500  | 1.32107300  | 4.42050300  |
| C  | -4.60827400 | -3.11028600 | -0.74220600 | C | 2.28388800  | 3.05646300  | 3.46403900  |
| H  | -4.20941900 | -4.07429000 | -0.38955900 | C | 2.05645600  | -1.69092300 | 2.30716100  |
| O  | -0.97159600 | -1.64168100 | 2.48366000  | C | 3.01496200  | -1.22432800 | 3.16935400  |
| C  | -3.54672500 | -2.03735400 | -0.74902500 | C | 3.73765900  | 0.41430300  | 1.49478200  |
| C  | -2.40296100 | -1.91995700 | -1.44109100 | C | 2.64588500  | -2.34744600 | -4.22462900 |
| H  | -5.07843600 | -3.27362400 | -1.71760500 | C | 1.26966600  | -5.66810000 | 1.24619500  |
| C  | -1.97081400 | -2.88976200 | -2.49945200 | C | 2.55765400  | -2.81746300 | -1.85210200 |
| H  | -2.77680100 | -3.59858900 | -2.72872400 | C | 4.17669200  | 1.05670000  | -4.04411700 |
| H  | -1.69080500 | -2.38791900 | -3.43234600 | C | 2.72638400  | -0.08212900 | 0.60620100  |
| H  | -1.09711400 | -3.46942200 | -2.18510800 | C | -1.55301300 | 5.86530900  | 0.57402600  |
| Rh | -1.26108900 | -0.30382700 | -0.56348000 | C | -1.78579700 | 3.49947200  | 1.00932200  |
| P  | 0.56992500  | -1.80515300 | -0.08458100 | C | 0.88978200  | -1.40024800 | -2.86227200 |
| P  | 0.03736700  | 1.52732900  | 0.38937700  | C | 5.34007500  | 0.34288900  | -3.86308300 |
| C  | 0.83166500  | 1.73856100  | 2.03744000  | C | 4.57278100  | 1.51570700  | 1.15815500  |
| C  | 0.39598200  | 1.02028300  | 3.15217600  | C | -1.09990000 | -5.46320100 | 0.85153100  |
| C  | 3.21860900  | 1.15785100  | -3.00251800 | C | 1.50225400  | -1.55846400 | -4.10444100 |
| C  | 1.36007800  | 1.39664700  | -0.88264000 | H | -0.30907200 | 0.21033600  | 3.02517900  |
| C  | 5.65636000  | 1.40390600  | 3.32529700  | H | 6.39467500  | 1.79540600  | 4.01901400  |
| C  | 3.88386600  | -0.17151400 | 2.79165600  | H | 1.01693600  | 4.13632600  | -0.82005500 |
| C  | 1.84605800  | 2.33421900  | 4.57958900  | H | 2.44343400  | -3.91144600 | 0.92728400  |
| C  | 0.35161100  | -3.54612100 | 0.48778600  | H | -1.78167000 | -3.54187100 | 0.19669300  |
| C  | 0.09272700  | 4.31009000  | -0.28130100 | H | 0.17013400  | 2.51466900  | -2.31688500 |
| C  | 1.44783300  | -4.33487200 | 0.87913600  | H | 6.49454500  | -0.88866400 | -2.50183100 |
| C  | -0.61137800 | 3.24078700  | 0.28786000  | H | -3.16533300 | 4.99061300  | 1.70976100  |
| C  | -0.00488100 | -6.23858700 | 1.23250100  | H | 4.85397300  | -0.76573700 | -0.67894400 |
| C  | 1.40498100  | -2.02878900 | -1.72075200 | H | 4.06910500  | -3.58146700 | -3.17268100 |
| C  | -0.92153600 | -4.12934700 | 0.48283500  | H | 0.16793700  | 6.43595900  | -0.59426900 |
| C  | 1.91388800  | -1.14672900 | 1.00134700  | H | 1.79767600  | 2.32345300  | -4.14614200 |
| C  | 2.50488300  | 0.62239100  | -0.69381400 | H | 6.13492600  | 2.83694300  | 1.76923300  |
| C  | 1.09619500  | 1.97461300  | -2.15792600 | H | 4.94710500  | -0.10985500 | 4.67097500  |
| C  | 5.58216100  | -0.31455200 | -2.63385700 | H | 2.11329400  | 3.34056400  | 1.34574800  |
| C  | 3.46613900  | 0.50665300  | -1.75170400 | H | 0.56225300  | 0.75055300  | 5.28016300  |
| C  | -2.25136200 | 4.80393400  | 1.15467000  | H | 3.02581300  | 3.84126300  | 3.57703400  |
| C  | 4.66465200  | -0.24446400 | -1.60936500 | H | 1.37987200  | -2.46608400 | 2.63682000  |
| C  | 3.17085600  | -2.97621300 | -3.09339200 | H | 3.10330000  | -1.64542800 | 4.16703500  |
| C  | -0.38325400 | 5.61514400  | -0.14427400 | H | 2.13040500  | -6.25736400 | 1.54898900  |
| C  | 2.00233400  | 1.86539100  | -3.18225500 | H | 2.99606000  | -3.29934700 | -0.98745200 |
| C  | 5.50948000  | 1.99363100  | 2.04740100  | H | 3.97131800  | 1.55474000  | -4.98790700 |
| C  | 4.85569500  | 0.34469300  | 3.68826300  | H | -2.33224300 | 2.67836500  | 1.46431300  |
| C  | 1.77461700  | 2.76824200  | 2.20252100  | H | 0.01219400  | -0.77092600 | -2.78912800 |

|   |             |             |             |   |             |             |             |
|---|-------------|-------------|-------------|---|-------------|-------------|-------------|
| H | 6.07012500  | 0.27455500  | -4.66432700 | C | 1.63095600  | 3.56219300  | -1.18467100 |
| H | 4.46227000  | 1.99120100  | 0.19157500  | C | -1.35223600 | 1.34864900  | 0.83945500  |
| H | -2.09886200 | -5.88961100 | 0.84587100  | C | -2.76014400 | -0.22661100 | -0.55340400 |
| H | 1.09103000  | -1.05273800 | -4.97326800 | C | -2.33674300 | -2.03145000 | -2.13445200 |
| H | 2.24227400  | 2.56339700  | 5.56473600  | C | -5.76661000 | 1.66611700  | -1.77968000 |
| H | -1.92067300 | 6.88168900  | 0.68101100  | C | -3.88830200 | 0.17588900  | -1.34261400 |
| H | 3.13082500  | -2.46525400 | -5.18913200 | C | 0.91179200  | -4.86278000 | -2.39295300 |
| H | -0.14202100 | -7.27629600 | 1.52258900  | C | -4.69667300 | 1.29493100  | -0.99733800 |
| C | -5.01507500 | 3.86608000  | -0.75600700 | C | -2.77034900 | 2.99526200  | -3.26951500 |
| C | -4.39007300 | 2.62083500  | -0.73411200 | C | 0.38821800  | -5.87379800 | -0.26842000 |
| C | -3.24284300 | 2.38951300  | -1.51113900 | C | -3.41404400 | -1.65678500 | -2.89913000 |
| C | -2.72048500 | 3.43923000  | -2.28702100 | C | -5.40127300 | -0.52000700 | 2.82694000  |
| C | -3.33964300 | 4.68654400  | -2.29004000 | C | -4.00471500 | 0.95549100  | 4.13372200  |
| C | -4.49193700 | 4.90352200  | -1.52995700 | C | -2.40517000 | -3.05735300 | 1.72944600  |
| H | -5.90919300 | 4.02668000  | -0.16044200 | C | -1.50706700 | -1.73041400 | 4.01848000  |
| H | -4.79582500 | 1.82456900  | -0.12003300 | C | -3.02974600 | -3.27932700 | 2.95480800  |
| H | -1.83577600 | 3.26561800  | -2.89049400 | C | -1.05100900 | 1.94921800  | 2.09693500  |
| H | -2.92169700 | 5.48998500  | -2.88941200 | C | -1.90569700 | 1.82724000  | 3.16176600  |
| C | -2.64787000 | 1.06725300  | -1.58613100 | C | -3.37218400 | 0.38108500  | 1.82166100  |
| C | -2.50488200 | 0.04186900  | -2.31604900 | C | -2.60988900 | 2.16300700  | -4.38024700 |
| H | -2.59606600 | -0.42943600 | -3.27986800 | C | 0.24467700  | 5.62649900  | 0.07791200  |
| H | -2.65596000 | 0.34669300  | 1.49275900  | C | -2.02349600 | 2.77477700  | -2.11570500 |
| H | -4.97490900 | 5.87617200  | -1.53786500 | C | -5.31405600 | -0.13224800 | -3.32901800 |

#### 14-ts-2

|   |             |             |             |   |             |             |             |
|---|-------------|-------------|-------------|---|-------------|-------------|-------------|
| P | -0.11065000 | 1.53494700  | -0.50255100 | C | 0.87905000  | -5.98924300 | -1.56911800 |
| P | -0.50902700 | -1.84591900 | 0.03107900  | C | 0.47082500  | -3.62848600 | -1.91692600 |
| C | -1.30940600 | -2.18456900 | 1.64613400  | C | -0.94477100 | 0.88568500  | -3.16877400 |
| C | -0.87448600 | -1.51684400 | 2.79462700  | C | -6.08059500 | 0.94888800  | -2.95896700 |
| C | -4.21108400 | -0.54543100 | -2.53546700 | C | -4.53678400 | -0.43268700 | 1.75832200  |
| C | -1.98568600 | -1.31906300 | -0.95815500 | C | 2.07098200  | 4.87820100  | -1.31382400 |
| C | -5.13951100 | 0.18347800  | 4.02556800  | C | -1.69510500 | 1.11243100  | -4.32481600 |
| C | -3.09972500 | 1.07024500  | 3.04740200  | H | -0.05015500 | -0.81674900 | 2.72211800  |
| C | -2.58212100 | -2.61576200 | 4.10119800  | H | -5.82937100 | 0.10339800  | 4.86060900  |
| C | 0.49161200  | 3.26634800  | -0.42310800 | H | -0.45570500 | -4.58388500 | 1.21617200  |
| C | -0.06748900 | -4.64317200 | 0.20726400  | H | -1.09879800 | 4.10909700  | 0.77849900  |
| C | -0.20300200 | 4.31116300  | 0.20296400  | H | 2.17048700  | 2.76368400  | -1.68535600 |
| C | -0.02824900 | -3.50158700 | -0.60908500 | H | -1.75690200 | -2.89350600 | -2.43438600 |
| C | 1.38068300  | 5.91339200  | -0.68038500 | H | -6.36797700 | 2.52535100  | -1.49721900 |
| C | -1.10499900 | 1.71253100  | -2.05471200 | H | 1.28635100  | -4.93885600 | -3.40959900 |
|   |             |             |             | H | -4.45736400 | 1.86850700  | -0.11049600 |
|   |             |             |             | H | -3.48598300 | 3.81171700  | -3.29569300 |

|   |             |             |             |           |            |             |             |
|---|-------------|-------------|-------------|-----------|------------|-------------|-------------|
| H | 0.35263400  | -6.74259900 | 0.38252400  | H         | 5.03652800 | -3.22152000 | 1.79742400  |
| H | -3.66657300 | -2.21514000 | -3.79643400 | C         | 1.98208300 | -2.81998000 | 2.46369700  |
| H | -6.28617000 | -1.14527500 | 2.75283000  | H         | 1.12061700 | -3.41047700 | 2.15060800  |
| H | -3.77907500 | 1.48731000  | 5.05421300  | H         | 2.79842500 | -3.51939800 | 2.68344800  |
| H | -2.77085900 | -3.55749900 | 0.83768100  | H         | 1.70172200 | -2.33206100 | 3.40403900  |
| H | -1.16950200 | -1.19513100 | 4.90091800  | Rh        | 1.27201200 | -0.21791700 | 0.51788400  |
| H | -3.87709300 | -3.95617700 | 3.01249500  | C         | 2.44878100 | 0.11662400  | 2.30642500  |
| H | -0.13973800 | 2.52403100  | 2.20313800  | C         | 2.55754700 | 1.15219200  | 1.57812800  |
| H | -1.67716400 | 2.31155400  | 4.10727800  | H         | 2.93356600 | 0.73117700  | -1.19409600 |
| H | -0.30035900 | 6.42676300  | 0.57038100  | C         | 3.12226500 | 2.48574200  | 1.47354900  |
| H | -2.16619100 | 3.42743200  | -1.26238800 | C         | 2.61668100 | 3.52579700  | 2.27259800  |
| H | -5.53822600 | -0.68956200 | -4.23453700 | C         | 4.22105900 | 2.74323100  | 0.63571600  |
| H | 0.51432700  | -2.76707900 | -2.57026600 | C         | 3.20473100 | 4.78822300  | 2.23981900  |
| H | -0.23860900 | 0.07289200  | -3.12938300 | H         | 1.77195700 | 3.33351000  | 2.92545400  |
| H | -6.92360700 | 1.25750900  | -3.57030500 | C         | 4.81653700 | 4.00272900  | 0.62278200  |
| H | -4.74443600 | -0.99225600 | 0.85535700  | H         | 4.61102300 | 1.95715200  | 0.00001200  |
| H | 2.95879000  | 5.09320500  | -1.90039900 | C         | 4.31056000 | 5.03000600  | 1.42115400  |
| H | -1.56543000 | 0.45501300  | -5.18004100 | H         | 2.79992700 | 5.58309200  | 2.85943300  |
| H | -3.08139900 | -2.77800100 | 5.05186500  | H         | 5.67289300 | 4.18301300  | -0.02069700 |
| H | 1.23056700  | -6.94809200 | -1.93874600 | H         | 4.76988200 | 6.01390400  | 1.40228600  |
| H | -3.19567700 | 2.33412500  | -5.27878700 | H         | 2.54093600 | -0.33539900 | 3.28021600  |
| H | 1.72852200  | 6.93784800  | -0.77585600 |           |            |             |             |
| C | 4.03158400  | -0.86300100 | -0.17405300 | <b>15</b> |            |             |             |
| C | 5.14609300  | -1.58154500 | -0.97063100 |           |            |             |             |
| C | 4.57328900  | -2.38590800 | -2.10380600 | C         | 4.28740700 | 0.32734200  | 0.27338000  |
| C | 3.34710500  | -2.18268400 | -2.60349600 | C         | 5.46573800 | -0.15645100 | -0.62846400 |
| C | 2.46119400  | -1.09515100 | -2.14682900 | C         | 5.03640500 | -0.40218800 | -2.05392600 |
| C | 2.82340700  | -0.31953200 | -0.91582100 | C         | 3.98250400 | 0.19262700  | -2.62495300 |
| H | 4.50432600  | -0.05756100 | 0.39939300  | C         | 3.21808500 | 1.22420300  | -1.89856100 |
| H | 5.22365200  | -3.15369000 | -2.51867200 | C         | 3.22435600 | 1.20087300  | -0.40814600 |
| H | 2.97637700  | -2.75623600 | -3.44790100 | H         | 4.70771600 | 0.89553900  | 1.10947600  |
| C | 6.25924300  | -0.66234700 | -1.45470700 | H         | 5.67164400 | -1.08494400 | -2.61567600 |
| H | 6.70572100  | -0.14361200 | -0.59984500 | H         | 3.73495600 | 0.05049100  | -3.67386600 |
| H | 7.04092400  | -1.23388000 | -1.96588900 | C         | 6.67937200 | 0.76251000  | -0.58039100 |
| H | 5.85936000  | 0.07937800  | -2.15386000 | H         | 7.04571200 | 0.83429900  | 0.44918800  |
| O | 5.71156000  | -2.48542100 | 0.00259700  | H         | 7.48480800 | 0.37819000  | -1.21518800 |
| C | 4.63929300  | -3.00856600 | 0.79911900  | H         | 6.40736000 | 1.76286000  | -0.93219700 |
| H | 4.25773300  | -3.94849500 | 0.37288600  | O         | 5.84295900 | -1.42711500 | -0.07176500 |
| O | 1.48729600  | -0.80072600 | -2.84085100 | C         | 4.61268400 | -2.09919200 | 0.21521700  |
| C | 3.58664900  | -1.92549300 | 0.78284200  | H         | 4.16911900 | -2.49527600 | -0.70682300 |
| C | 2.41309400  | -1.83059600 | 1.42270300  | O         | 2.61582900 | 2.08498800  | -2.55041900 |

|    |             |             |             |   |             |             |             |
|----|-------------|-------------|-------------|---|-------------|-------------|-------------|
| H  | 3.21629600  | 2.21921100  | -0.02321900 | C | -2.15466300 | -2.77701000 | -3.06137200 |
| C  | 3.77148700  | -1.01547000 | 0.85056600  | C | -3.24290600 | -0.77460600 | -2.15989700 |
| C  | 3.05502200  | -1.16618800 | 2.00252400  | C | -2.62325400 | -2.38118200 | 4.29607200  |
| H  | 4.83782100  | -2.93655800 | 0.87632100  | C | 2.43197700  | -4.51236600 | -1.18402900 |
| C  | 2.86740100  | -2.48036600 | 2.71346200  | C | -2.19925900 | -2.97189400 | 1.98818300  |
| H  | 1.80972200  | -2.64486300 | 2.94213500  | C | -4.92850000 | 0.34091200  | 3.08026800  |
| H  | 3.22969300  | -3.33903700 | 2.14844600  | C | -2.39478900 | -0.86249800 | -1.01450400 |
| H  | 3.39763900  | -2.43982800 | 3.67543400  | C | -0.31345200 | 6.13999700  | -0.90632700 |
| Rh | 1.48034400  | 0.13511700  | 0.13712300  | C | -1.44426500 | 4.04463900  | -0.47328500 |
| P  | -0.16731100 | -1.79099100 | 0.42726500  | C | -0.81607800 | -1.31875100 | 3.09413900  |
| P  | -0.22089700 | 1.49961600  | -0.61297800 | C | -5.84395100 | -0.64709200 | 2.79606900  |
| C  | -0.50458400 | 1.05877400  | -2.36659500 | C | -4.20045100 | 0.26539300  | -2.31065300 |
| C  | 0.21589100  | 0.00278800  | -2.94007100 | C | 1.42079200  | -5.60543000 | 0.71958100  |
| C  | -3.84915400 | 0.60499300  | 2.19735100  | C | -1.56022200 | -1.47745100 | 4.26344700  |
| C  | -1.71069700 | 1.11484300  | 0.40424700  | H | 0.89945200  | -0.58252800 | -2.33016000 |
| C  | -4.81540300 | -0.58638700 | -4.49677300 | H | -5.42254200 | -0.49762800 | -5.39289000 |
| C  | -3.10211400 | -1.73482200 | -3.21161000 | H | 1.81574300  | 3.51393100  | -1.26687700 |
| C  | -0.84405300 | 0.41499000  | -5.06931700 | H | 1.80134100  | -2.49034300 | -1.55195500 |
| C  | 0.78870200  | -3.33175900 | 0.16280700  | H | -0.02527100 | -4.45467000 | 1.81782400  |
| C  | 0.90608700  | 4.05236200  | -1.03790800 | H | -1.19247900 | 2.68657000  | 1.81194900  |
| C  | 1.68926300  | -3.36403500 | -0.91436300 | H | -6.42930100 | -2.19945900 | 1.39997600  |
| C  | -0.24599200 | 3.34002800  | -0.67775500 | H | -2.40779200 | 5.96319300  | -0.41544800 |
| C  | 2.30340800  | -5.63506400 | -0.36159600 | H | -4.56393900 | -1.80561800 | -0.13795900 |
| C  | -1.13261200 | -2.06066100 | 1.95055000  | H | -3.76874900 | -3.82988700 | 3.17991900  |
| C  | 0.66084800  | -4.46274100 | 0.97866300  | H | 1.77653500  | 5.97849900  | -1.41804800 |
| C  | -1.42509400 | -1.85907600 | -0.93038500 | H | -2.99938200 | 2.20996400  | 3.37706700  |
| C  | -2.59340900 | 0.07610200  | 0.12805300  | H | -5.68469600 | 1.16457600  | -3.55647000 |
| C  | -1.87669500 | 1.88039800  | 1.59538700  | H | -3.78363500 | -2.34344000 | -5.17075100 |
| C  | -5.70771800 | -1.41741600 | 1.61742800  | H | -1.93945400 | 2.63211600  | -2.73794000 |
| C  | -3.70305600 | -0.17465200 | 1.00677200  | H | 0.60440800  | -1.14703000 | -4.71403800 |
| C  | -1.47360900 | 5.43517800  | -0.58303000 | H | -2.25580000 | 2.04532200  | -5.11303600 |
| C  | -4.66106700 | -1.19437700 | 0.75036500  | H | -0.61321500 | -3.63614100 | -1.87960000 |
| C  | -2.93661600 | -3.13270500 | 3.15949000  | H | -2.07109400 | -3.52801700 | -3.84229900 |
| C  | 0.87216900  | 5.44196200  | -1.14525500 | H | 3.11678200  | -4.52687500 | -2.02686400 |
| C  | -2.90138500 | 1.62295200  | 2.46839800  | H | -2.46258500 | -3.53745100 | 1.09985500  |
| C  | -4.96465500 | 0.35816700  | -3.45191300 | H | -5.01669500 | 0.93829000  | 3.98367200  |
| C  | -3.90553300 | -1.61246700 | -4.37595800 | H | -2.35968000 | 3.52051400  | -0.22932400 |
| C  | -1.38570400 | 1.80275100  | -3.16317800 | H | 0.00499800  | -0.61669100 | 3.06096800  |
| C  | 0.04761400  | -0.32001100 | -4.28383100 | H | -6.66890300 | -0.84071900 | 3.47545900  |
| C  | -1.55864900 | 1.47462500  | -4.50724900 | H | -4.31208400 | 0.99879400  | -1.51988000 |
| C  | -1.33737900 | -2.83578000 | -1.95771700 | H | 1.31830500  | -6.47416000 | 1.36338500  |

|   |             |             |             |    |             |             |             |
|---|-------------|-------------|-------------|----|-------------|-------------|-------------|
| H | -1.31548100 | -0.88755600 | 5.14218800  | C  | 2.94443800  | -1.08363600 | 2.05716600  |
| H | -0.98163000 | 0.16174100  | -6.11637000 | H  | 4.10457700  | -3.50463300 | 1.22422400  |
| H | -0.33650900 | 7.22319900  | -0.98393000 | C  | 2.62524700  | -2.11654700 | 3.10870900  |
| H | -3.21045200 | -2.49897500 | 5.20208800  | H  | 2.10317000  | -1.68173900 | 3.96225100  |
| H | 2.88823700  | -6.52740100 | -0.56446200 | H  | 2.01134100  | -2.92396600 | 2.70169100  |
| C | 2.49646400  | 0.01194100  | 2.68219300  | H  | 3.56182900  | -2.56429200 | 3.46763500  |
| C | 1.75248900  | 0.88652400  | 1.98593500  | Rh | 1.42922100  | -0.04831100 | 0.25475800  |
| H | 2.68270400  | 0.12717000  | 3.75169700  | P  | -0.21578100 | -1.79722200 | 0.07983100  |
| C | 1.21320600  | 2.11645400  | 2.58694400  | P  | -0.21908500 | 1.44125300  | -0.40603400 |
| C | 1.43071500  | 3.37787600  | 2.01332200  | C  | -0.90329700 | 1.23944000  | -2.10041400 |
| C | 0.50269500  | 2.04782900  | 3.80126600  | C  | -0.33751400 | 0.32880400  | -2.99515900 |
| C | 0.91796800  | 4.53163500  | 2.60393500  | C  | -3.29739300 | 0.52458600  | 2.97627300  |
| H | 2.00209800  | 3.45288200  | 1.09948100  | C  | -1.51727800 | 1.07191000  | 0.84342800  |
| C | -0.00160900 | 3.20180800  | 4.39761500  | C  | -5.81679600 | 0.20409100  | -3.38097100 |
| H | 0.33476000  | 1.08443600  | 4.26904300  | C  | -3.91981400 | -1.15152200 | -2.69661100 |
| C | 0.18952000  | 4.44755300  | 3.79288500  | C  | -1.83103800 | 1.08575400  | -4.73905500 |
| H | 1.08401000  | 5.49387300  | 2.12859600  | C  | 0.54068600  | -3.35678100 | -0.50905000 |
| H | -0.55471500 | 3.12632200  | 5.32967100  | C  | 0.57167100  | 3.85952200  | -1.53150400 |
| H | -0.21860500 | 5.34483000  | 4.24905700  | C  | 1.12286700  | -3.37662700 | -1.78833200 |

### 16-ts

|   |            |             |             |   |             |             |             |
|---|------------|-------------|-------------|---|-------------|-------------|-------------|
| C | 4.32944700 | -0.49830400 | 0.03347700  | C | 1.85741400  | -5.65460700 | -1.44284500 |
| C | 4.87714500 | -1.41016600 | -1.09047900 | C | -0.90663400 | -2.19546500 | 1.72777100  |
| C | 3.95160100 | -1.46169900 | -2.27740600 | C | 0.64307600  | -4.49453700 | 0.30365900  |
| C | 3.09306500 | -0.47826700 | -2.57417800 | C | -1.75467300 | -1.61463700 | -0.93310200 |
| C | 3.00378600 | 0.76158100  | -1.77113100 | C | -2.55356700 | 0.16891200  | 0.63846900  |
| C | 3.54183400 | 0.72820600  | -0.36999600 | C | -1.30048500 | 1.61817700  | 2.14375500  |
| H | 5.17403100 | -0.19515900 | 0.66424200  | C | -5.42675700 | -1.26469900 | 2.60176600  |
| H | 4.06131800 | -2.32696000 | -2.92668800 | C | -3.47518400 | -0.11230000 | 1.70698600  |
| H | 2.51084100 | -0.48870600 | -3.49076900 | C | -0.79514400 | 5.52712100  | 0.22733500  |
| C | 6.28725100 | -1.03885100 | -1.53790600 | C | -4.55509300 | -1.02530300 | 1.56147200  |
| H | 6.96904600 | -1.08151600 | -0.68192700 | C | -2.46762000 | -3.43878400 | 3.10335600  |
| H | 6.64315800 | -1.73252100 | -2.30655200 | C | 0.57552100  | 5.23651800  | -1.73172100 |
| H | 6.29755200 | -0.02601200 | -1.95298600 | C | -2.17398700 | 1.36920600  | 3.16952100  |
| O | 4.94895200 | -2.70287900 | -0.46433400 | C | -5.67054500 | 0.99319700  | -2.21403000 |
| C | 3.81097300 | -2.85616400 | 0.39211000  | C | -4.96069500 | -0.84852800 | -3.61326900 |
| H | 2.98852100 | -3.33393000 | -0.14188300 | C | -1.93599500 | 2.08433200  | -2.53950200 |
| O | 2.65522200 | 1.82014200  | -2.30633400 | C | -0.79833500 | 0.25110500  | -4.31017600 |
| H | 4.09017000 | 1.64692800  | -0.19514300 | C | -2.40103400 | 2.00079300  | -3.84912400 |
| C | 3.46912500 | -1.45845200 | 0.83949800  | C | -1.95638600 | -2.43309400 | -2.07484100 |
|   |            |             |             | C | -3.01259300 | -2.21420600 | -2.92519000 |
|   |            |             |             | C | -3.76621300 | -0.35337500 | -1.51850100 |

|   |             |             |             |   |             |             |             |
|---|-------------|-------------|-------------|---|-------------|-------------|-------------|
| C | -2.02350400 | -2.74632600 | 4.23458800  | H | -0.10412000 | 7.15428100  | -1.00706800 |
| C | 1.76429600  | -4.52174100 | -2.25664700 | H | -2.46427300 | -2.95395500 | 5.20518800  |
| C | -1.91771200 | -3.16229700 | 1.85415900  | H | 2.36786400  | -6.54302400 | -1.80263100 |
| C | -4.20744000 | 0.25471900  | 4.02983500  | C | 2.87175500  | 0.33433000  | 2.38096200  |
| C | -2.67856700 | -0.61429000 | -0.62871400 | C | 2.60196800  | 1.24487700  | 1.39038500  |
| C | -0.10468600 | 6.07947000  | -0.84958000 | H | 2.92630500  | 0.62298200  | 3.42966400  |
| C | -0.80707200 | 4.14414800  | 0.42851000  | C | 2.49934300  | 2.69668500  | 1.62324300  |
| C | -0.47184000 | -1.50399100 | 2.86105400  | C | 2.82417500  | 3.66107400  | 0.65576500  |
| C | -5.25750600 | -0.61762100 | 3.84737400  | C | 2.04264200  | 3.14563400  | 2.88090100  |
| C | -4.67432800 | 0.71969800  | -1.30387000 | C | 2.74811100  | 5.02111400  | 0.95253400  |
| C | 1.30169200  | -5.63502800 | -0.16310300 | H | 3.10925100  | 3.35471300  | -0.34332100 |
| C | -1.02597100 | -1.77959100 | 4.11138400  | C | 1.94799500  | 4.50483900  | 3.16615300  |
| H | 0.45619400  | -0.32377200 | -2.65622400 | H | 1.74559000  | 2.42261400  | 3.63312100  |
| H | -6.60590800 | 0.43412900  | -4.09083800 | C | 2.31248700  | 5.45146700  | 2.20525300  |
| H | 1.10247900  | 3.21983200  | -2.22251100 | H | 3.00675900  | 5.74539300  | 0.18698600  |
| H | 1.08236900  | -2.49182100 | -2.41260900 | H | 1.58654300  | 4.82374000  | 4.13971200  |
| H | 0.21663700  | -4.49555800 | 1.29956200  | H | 2.24119500  | 6.51242400  | 2.42611400  |
| H | -0.42310900 | 2.22745400  | 2.32832300  |   |             |             |             |
| H | -6.24656800 | -1.96411000 | 2.46606300  |   |             |             |             |
| H | -1.34257600 | 6.16667700  | 0.91380200  |   |             |             |             |
| H | -4.69268800 | -1.54096900 | 0.61941400  | C | -4.17509300 | -1.58252500 | -0.29198900 |
| H | -3.25412800 | -4.18216100 | 3.19314300  | C | -4.38641600 | -2.55926500 | 0.87368900  |
| H | 1.11059500  | 5.65044900  | -2.58178600 | C | -3.65842900 | -2.11538000 | 2.11028100  |
| H | -2.00330300 | 1.80143700  | 4.15173400  | C | -3.32410500 | -0.83877500 | 2.34886000  |
| H | -6.34771000 | 1.82432200  | -2.03997400 | C | -3.64029100 | 0.25648200  | 1.42111900  |
| H | -5.06088400 | -1.45996200 | -4.50596800 | C | -4.13577700 | -0.08303000 | 0.00293000  |
| H | -2.37634000 | 2.80468900  | -1.85871400 | H | -4.98459500 | -1.76257900 | -1.01421300 |
| H | -0.35249300 | -0.46470600 | -4.99487400 | H | -3.45694900 | -2.89159800 | 2.84442400  |
| H | -3.21111800 | 2.64681900  | -4.17356300 | H | -2.86258600 | -0.53611500 | 3.28429600  |
| H | -1.26830900 | -3.24047600 | -2.28728800 | C | -5.85629300 | -2.81998000 | 1.19807900  |
| H | -3.14955800 | -2.84454800 | -3.79964600 | H | -6.36481300 | -3.20962300 | 0.30993000  |
| H | 2.20257100  | -4.52436900 | -3.25024500 | H | -5.94823900 | -3.55485200 | 2.00441700  |
| H | -2.28087300 | -3.68733300 | 0.97585200  | H | -6.34925600 | -1.89509900 | 1.51560500  |
| H | -4.05335200 | 0.74651400  | 4.98659600  | O | -3.80618900 | -3.80327600 | 0.41905500  |
| H | -1.38928000 | 3.75233000  | 1.25013700  | C | -2.92539300 | -3.58884800 | -0.69113900 |
| H | 0.28352200  | -0.73566200 | 2.75504100  | H | -1.94406300 | -4.00708500 | -0.47827500 |
| H | -5.95034500 | -0.81825900 | 4.65932800  | O | -3.56772900 | 1.42140800  | 1.80005000  |
| H | -4.56267000 | 1.33897200  | -0.42131300 | H | -5.16709500 | 0.28802800  | -0.03211500 |
| H | 1.37785500  | -6.50800000 | 0.47855700  | C | -2.92341000 | -2.11306900 | -0.95246800 |
| H | -0.68983100 | -1.22607800 | 4.98338900  | C | -2.41020200 | -1.47002800 | -2.06560100 |
| H | -2.19247700 | 1.02447900  | -5.76148500 | H | -3.33282000 | -4.11760600 | -1.56772900 |

**17**



|    |             |             |             |   |             |             |             |
|----|-------------|-------------|-------------|---|-------------|-------------|-------------|
| C  | -1.80457400 | -2.21462200 | -3.22086400 | C | 2.84264800  | -2.76813500 | -1.61898900 |
| H  | -1.31510500 | -1.54461500 | -3.92936800 | C | 4.79781400  | 0.99498000  | -3.60252200 |
| H  | -1.08191300 | -2.96365700 | -2.88756600 | C | 2.75261300  | -0.05542900 | 0.81734400  |
| H  | -2.60726500 | -2.74278500 | -3.75411000 | C | -1.18772400 | 5.95440400  | 0.19428300  |
| Rh | -1.24659000 | -0.39763600 | -0.48806200 | C | 0.34498800  | 4.24095600  | -0.56823400 |
| P  | 0.68186600  | -1.73796800 | -0.14315300 | C | 1.28556400  | -1.39449900 | -2.86156400 |
| P  | 0.03469100  | 1.47753600  | 0.13684400  | C | 5.94098200  | 0.32118300  | -3.23328100 |
| C  | 0.45985900  | 1.48773800  | 1.92575100  | C | 4.32456500  | 1.68046100  | 1.67887000  |
| C  | -0.08242400 | 0.51015200  | 2.76459000  | C | 0.09785800  | -5.82038500 | 0.25626400  |
| C  | 3.70416800  | 1.11286800  | -2.70716400 | C | 2.05522300  | -1.56217400 | -4.01251500 |
| C  | 1.55094100  | 1.35363900  | -0.88756500 | H | -0.67197200 | -0.28895300 | 2.32838900  |
| C  | 5.19734100  | 1.49887700  | 3.93550700  | H | 5.80323900  | 1.91456800  | 4.73529600  |
| C  | 3.72873800  | -0.23831900 | 3.08153900  | H | -2.24339600 | 2.87779700  | 1.16909700  |
| C  | 0.91306300  | 1.58259400  | 4.68681900  | H | -0.83816500 | -2.57285400 | 2.14538300  |
| C  | 0.22212400  | -3.40617200 | 0.45659300  | H | 1.12137900  | -4.55062600 | -1.14171400 |
| C  | -1.61819700 | 3.62933200  | 0.70409800  | H | 0.53254400  | 2.34382300  | -2.53556300 |
| C  | -0.55733500 | -3.48197700 | 1.62419500  | H | 6.92531900  | -0.81295100 | -1.66962200 |
| C  | -0.45759700 | 3.24945800  | 0.01215200  | H | 0.60623100  | 6.34252900  | -0.93875500 |
| C  | -0.66013500 | -5.88831800 | 1.42573100  | H | 5.05467200  | -0.64917800 | -0.09169000 |
| C  | 1.66431500  | -2.00478900 | -1.66307100 | H | 4.52124200  | -3.52418900 | -2.72831300 |
| C  | 0.54156900  | -4.58640800 | -0.22728300 | H | -2.88310900 | 5.24594000  | 1.32765400  |
| C  | 1.99666800  | -1.20368400 | 1.05602400  | H | 2.41918200  | 2.16490200  | -4.09627000 |
| C  | 2.68212300  | 0.64922200  | -0.49883700 | H | 5.61372900  | 3.13175300  | 2.56963800  |
| C  | 1.45248700  | 1.86614500  | -2.21494000 | H | 4.60323000  | -0.23169400 | 5.05754100  |
| C  | 6.02719300  | -0.27154900 | -1.95242300 | H | 1.63133100  | 3.30232600  | 1.84266600  |
| C  | 3.79171100  | 0.52659600  | -1.40462300 | H | -0.28058500 | -0.21318500 | 4.78220000  |
| C  | -0.02585900 | 5.58548600  | -0.48303000 | H | 2.05820200  | 3.36517800  | 4.27389600  |
| C  | 4.97815600  | -0.17768100 | -1.06367200 | H | 1.62461800  | -2.82975200 | 2.44664500  |
| C  | 3.60831500  | -2.93770900 | -2.77027200 | H | 3.12735100  | -1.99897200 | 4.18330000  |
| C  | -1.97763500 | 4.97101500  | 0.79531400  | H | -1.58624900 | -4.75698600 | 3.01412500  |
| C  | 2.50161600  | 1.76191100  | -3.09054900 | H | 3.16681200  | -3.21545400 | -0.68436500 |
| C  | 5.09058100  | 2.18941400  | 2.70371700  | H | 4.71091300  | 1.44331900  | -4.58866600 |
| C  | 4.53252200  | 0.30729600  | 4.11661800  | H | 1.26849000  | 3.98429400  | -1.07154500 |
| C  | 1.22107000  | 2.52742100  | 2.48116200  | H | 0.40752400  | -0.76211100 | -2.87470000 |
| C  | 0.14167500  | 0.55534500  | 4.14093500  | H | 6.77396100  | 0.23658600  | -3.92512300 |
| C  | 1.45351600  | 2.56703900  | 3.85394300  | H | 4.23978600  | 2.22551000  | 0.74600400  |
| C  | 2.16928800  | -1.91130600 | 2.27518800  | H | 0.34556200  | -6.72769500 | -0.28709100 |
| C  | 3.01469100  | -1.44841000 | 3.25328200  | H | 1.75914400  | -1.07055000 | -4.93464300 |
| C  | 3.61599700  | 0.45737100  | 1.83616000  | H | 1.09305600  | 1.61822400  | 5.75741100  |
| C  | 3.21494800  | -2.33621400 | -3.96976300 | H | -1.47231100 | 7.00070300  | 0.26076200  |
| C  | -0.98560300 | -4.71417300 | 2.11066500  | H | 3.82116500  | -2.45914700 | -4.86238900 |

|   |             |             |             |   |             |             |             |
|---|-------------|-------------|-------------|---|-------------|-------------|-------------|
| H | -1.00427100 | -6.84879400 | 1.79766600  | C | 1.24151400  | 3.54062200  | 0.13150800  |
| C | -2.67371900 | -0.05129800 | -2.11375500 | H | 2.32209500  | 3.71102400  | 0.15240200  |
| C | -3.31914700 | 0.65039600  | -1.07854300 | H | 0.83269600  | 3.82694800  | 1.10967000  |
| H | -2.35482900 | 0.48541100  | -2.99891900 | H | 0.80408000  | 4.22593100  | -0.60691300 |
| C | -3.54608300 | 2.10331100  | -1.29646600 | H | -1.23610700 | 2.54094400  | -0.39877100 |
| C | -4.64584400 | 2.77301000  | -0.73280300 | C | -2.37147100 | 0.09042000  | -0.26463500 |
| C | -2.71011000 | 2.84150500  | -2.16021000 | C | -2.81536200 | -1.09509300 | -0.87850200 |
| C | -4.91921900 | 4.10396400  | -1.04819000 | C | -3.33906000 | 0.93355600  | 0.31567400  |
| H | -5.29929900 | 2.26381800  | -0.03685100 | C | -4.17180300 | -1.41770300 | -0.92308000 |
| C | -2.98436900 | 4.16618900  | -2.47930400 | H | -2.09938700 | -1.76209300 | -1.34915800 |
| H | -1.81434900 | 2.38466100  | -2.56628000 | C | -4.69343400 | 0.61170200  | 0.27080400  |
| C | -4.09677900 | 4.80703500  | -1.92829100 | H | -3.01709400 | 1.83308900  | 0.83105900  |
| H | -5.78062400 | 4.59038000  | -0.59916200 | C | -5.11854500 | -0.56643800 | -0.35008700 |
| H | -2.31227600 | 4.70719700  | -3.13891300 | H | -4.48848300 | -2.33564700 | -1.41092200 |
| H | -4.30802900 | 5.84496200  | -2.16850300 | H | -5.41840900 | 1.27536800  | 0.73439400  |
|   |             |             |             | H | -6.17430200 | -0.82068500 | -0.37966500 |

## 18

|   |             |             |             |
|---|-------------|-------------|-------------|
| O | 3.74491700  | -0.14708000 | -0.69086000 |
| O | -0.56960000 | -0.74869500 | 2.27187000  |
| C | 1.66236000  | -1.37242300 | 1.86794100  |
| H | 1.75784500  | -1.64511500 | 2.91626700  |
| C | 0.11041600  | -0.63755200 | -0.04534400 |
| H | -0.24758100 | -1.59358800 | -0.44525000 |
| C | 1.40060500  | -0.25368000 | -0.76957000 |
| H | 1.22535100  | -0.31734500 | -1.85431200 |
| C | 0.33080400  | -0.89440000 | 1.45392100  |
| C | -0.94070700 | 0.45195000  | -0.23694500 |
| C | 1.81949800  | 1.15226300  | -0.41556900 |
| C | 2.66020400  | -1.06930200 | -0.43160100 |
| C | -0.51317800 | 1.73476400  | -0.29611300 |
| C | 0.90378200  | 2.11119000  | -0.19817300 |
| C | 3.32191900  | 1.17764000  | -0.33137100 |
| H | 3.79712500  | 1.87474700  | -1.03146800 |
| H | 3.66640700  | 1.43182700  | 0.68310600  |
| C | 2.70327100  | -1.45700100 | 1.02589300  |
| H | 3.66969000  | -1.81049400 | 1.38158300  |
| C | 2.87762100  | -2.28936700 | -1.31794500 |
| H | 2.92849200  | -1.97852500 | -2.36668500 |
| H | 2.05259000  | -2.99926800 | -1.19715400 |
| H | 3.81184000  | -2.79781300 | -1.05709600 |

## 1c

|   |             |             |             |
|---|-------------|-------------|-------------|
| C | 9.04785900  | -0.42778300 | -3.04773500 |
| C | 10.54271700 | -0.39507000 | -3.19100700 |
| C | 8.85466900  | 0.01043000  | -0.53972700 |
| C | 8.34078000  | -0.26804200 | -1.92222100 |
| H | 8.51304000  | -0.61867500 | -3.97759600 |
| O | 11.00039200 | 0.47958100  | -4.22993500 |
| C | 10.85950000 | 1.86528900  | -3.92692900 |
| H | 11.09047700 | 2.04901500  | -2.86639300 |
| H | 7.25547500  | -0.34678400 | -1.99811800 |
| C | 9.53981300  | 2.42206900  | -4.25540100 |
| C | 8.45889400  | 2.88773000  | -4.54031400 |
| H | 11.62732800 | 2.37787700  | -4.51862800 |
| C | 7.15523200  | 3.44598800  | -4.88622900 |
| H | 7.00793600  | 4.42426400  | -4.41253700 |
| H | 7.05187100  | 3.58023500  | -5.96975000 |
| H | 6.34349000  | 2.78906700  | -4.55009300 |
| H | 11.03694300 | -0.13541000 | -2.24569800 |
| H | 10.90796200 | -1.38388600 | -3.49525600 |
| H | 9.93682700  | 0.16202300  | -0.50479200 |
| H | 8.37131300  | 0.90584500  | -0.12641100 |
| H | 8.60934400  | -0.81710700 | 0.14033000  |

**1d**

|   |             |             |            |
|---|-------------|-------------|------------|
| C | -1.38322800 | -0.08696700 | 3.05464400 |
| H | -1.54932100 | 0.09452500  | 4.12369200 |
| H | -2.18409900 | 0.42143700  | 2.50372500 |
| C | -0.06613500 | 0.38743900  | 2.63420000 |
| C | 1.02514300  | 0.78057600  | 2.28600900 |
| C | 2.34219700  | 1.25553500  | 1.86637300 |
| H | 3.04260000  | 0.42186200  | 1.73283900 |
| H | 2.28563700  | 1.79689700  | 0.91395000 |
| H | 2.77521200  | 1.93648900  | 2.60947300 |
| H | -1.49291100 | -1.16442200 | 2.88012600 |

**6-a**

|   |             |             |             |
|---|-------------|-------------|-------------|
| P | -0.79870300 | -0.02509100 | -1.39360200 |
| P | 0.55527200  | 0.71767400  | 1.54388000  |
| C | 1.66949000  | 1.99157000  | 0.83737500  |
| C | 2.42702700  | 1.68568900  | -0.29939400 |
| C | -3.92820400 | 1.97196200  | 1.73533100  |
| C | -1.16072600 | 1.36636400  | 1.63306300  |
| C | 0.37096900  | 6.71617300  | -0.66086500 |
| C | 0.19755800  | 4.52771600  | -1.70263600 |
| C | 3.48954200  | 3.85407100  | -0.18264900 |
| C | -0.50068600 | -0.68466500 | -3.07844300 |
| C | 2.46017000  | 0.16602800  | 3.48584200  |
| C | 0.82296000  | -0.71199700 | -3.54964400 |
| C | 1.18891300  | 0.72458200  | 3.27424600  |
| C | 0.10404300  | -1.82145800 | -5.57247500 |
| C | -2.58779100 | -0.23126900 | -1.09116200 |
| C | -1.51471700 | -1.24152300 | -3.86600100 |
| C | -0.56850300 | 1.80287200  | -1.56572200 |
| C | -1.71252700 | 2.17385700  | 0.64471500  |
| C | -2.00018400 | 0.82065500  | 2.64757500  |
| C | -5.06631600 | 3.64431400  | -0.21049300 |
| C | -3.10795800 | 2.51275200  | 0.69483500  |
| C | 1.15601500  | 1.42180200  | 5.60127600  |
| C | -3.72163600 | 3.35126300  | -0.27569700 |
| C | -4.89783400 | 0.28256600  | -1.60614800 |
| C | 3.05989500  | 0.21417500  | 4.74268000  |
| C | -3.33880300 | 1.11268000  | 2.69663800  |

|   |             |             |             |
|---|-------------|-------------|-------------|
| C | -0.35631300 | 6.23833900  | 0.45635200  |
| C | 0.63739500  | 5.87745000  | -1.71928000 |
| C | 1.84325700  | 3.22879100  | 1.47458400  |
| C | 3.33338200  | 2.61621100  | -0.80966500 |
| C | 2.74501100  | 4.15797800  | 0.96096200  |
| C | 0.09977500  | 2.32203400  | -2.70679900 |
| C | 0.46846500  | 3.64323400  | -2.77427900 |
| C | -0.52903100 | 4.03834100  | -0.57103000 |
| C | -5.31729500 | -0.57554300 | -0.58499200 |
| C | 1.12265700  | -1.26608300 | -4.79131200 |
| C | -3.53858200 | 0.45977700  | -1.85763200 |
| C | -5.31218100 | 2.28252000  | 1.77014800  |
| C | -0.91388600 | 2.66165100  | -0.52236200 |
| C | 2.40284500  | 0.83225200  | 5.80943500  |
| C | 0.55407400  | 1.37582100  | 4.34157800  |
| C | -3.01380700 | -1.08783600 | -0.07003700 |
| C | -5.87265900 | 3.10543700  | 0.81905900  |
| C | -0.79824800 | 4.93499600  | 0.49942200  |
| C | -1.21037100 | -1.80939700 | -5.10664400 |
| C | -4.37395100 | -1.26172900 | 0.18195100  |
| H | 2.28986200  | 0.72126000  | -0.78363600 |
| H | 0.71640400  | 7.74566400  | -0.67837000 |
| H | 3.00168300  | -0.27554900 | 2.65830400  |
| H | 1.62007000  | -0.29559300 | -2.94076100 |
| H | -2.54047200 | -1.24267800 | -3.51627900 |
| H | -1.57669200 | 0.15958300  | 3.39341500  |
| H | -5.51353500 | 4.28865500  | -0.96182100 |
| H | 0.64798300  | 1.92919700  | 6.41630400  |
| H | -3.12256300 | 3.76042400  | -1.07972600 |
| H | -5.62966100 | 0.82679200  | -2.19528600 |
| H | 4.04305000  | -0.22488600 | 4.88552100  |
| H | -3.96447300 | 0.68298300  | 3.47395400  |
| H | -0.56213800 | 6.90584400  | 1.28805900  |
| H | 1.19344300  | 6.23134700  | -2.58324800 |
| H | 1.27050700  | 3.46566300  | 2.36536400  |
| H | 3.91017900  | 2.37656000  | -1.69839600 |
| H | 2.86289200  | 5.12081000  | 1.44870300  |
| H | 0.32936500  | 1.66988700  | -3.53871800 |
| H | 0.98797700  | 4.02105500  | -3.65066900 |
| H | 2.14968000  | -1.27431600 | -5.14455700 |
| H | -3.21641500 | 1.14266100  | -2.63753800 |

|    |             |             |             |   |             |             |             |
|----|-------------|-------------|-------------|---|-------------|-------------|-------------|
| H  | -5.91901800 | 1.85610900  | 2.56432200  | C | 2.17342900  | 1.86966400  | 0.95056200  |
| H  | -0.40059500 | 1.86679800  | 4.19995600  | C | 1.95201200  | 1.49765200  | 2.28083300  |
| H  | -2.27251400 | -1.60487000 | 0.52783800  | C | 1.43218300  | -1.41828700 | -3.58351600 |
| H  | -6.93264500 | 3.33944200  | 0.85355000  | C | 1.21920100  | 0.54148300  | -1.55432000 |
| H  | -1.34255700 | 4.57711000  | 1.36562500  | C | 6.40848000  | -0.96248800 | 1.04847600  |
| H  | -2.00617400 | -2.24206400 | -5.70610100 | C | 4.11957400  | -1.44232400 | 1.71110100  |
| H  | -4.69182800 | -1.92406600 | 0.98203900  | C | 4.24229000  | 2.03829800  | 2.83010100  |
| H  | 4.19093700  | 4.58082800  | -0.58220700 | C | -1.28678200 | -1.85318900 | 2.37100600  |
| H  | 2.86724300  | 0.86735200  | 6.79060000  | C | 0.09700500  | 4.44920800  | -0.55927100 |
| H  | -6.37746900 | -0.70201300 | -0.38560400 | C | -1.19274100 | -1.13556100 | 3.57591400  |
| H  | 0.33722000  | -2.26354700 | -6.53679200 | C | 0.90633300  | 3.42465000  | -1.07222400 |
| Rh | 0.50512200  | -1.20755500 | 0.23230100  | C | -2.70674400 | -2.69409700 | 4.63811200  |
| C  | 0.66632500  | -2.70366200 | 1.86667000  | C | -0.84616100 | -2.32604600 | -0.47835100 |
| C  | 1.80789300  | -2.29412400 | 1.58927300  | C | -2.10611200 | -2.98839900 | 2.31125800  |
| C  | 2.64711900  | -2.78896400 | -1.53721900 | C | 1.34596500  | -1.40736700 | 1.14234600  |
| H  | 2.82845200  | -3.43537700 | -2.40479400 | C | 1.79144300  | -0.68972300 | -1.24195400 |
| H  | 2.97903900  | -1.77761200 | -1.79086300 | C | 0.69698100  | 0.77653400  | -2.86040700 |
| C  | 1.22499100  | -2.81861100 | -1.18141600 | C | 2.69984300  | -3.86415000 | -3.04127700 |
| C  | 0.03485900  | -3.10548600 | -1.03202100 | C | 1.93868500  | -1.68200100 | -2.27013100 |
| C  | -1.29075300 | -3.72283500 | -1.15243200 | C | 1.88680700  | 5.00627400  | -2.62765800 |
| H  | -1.74877600 | -3.90047900 | -0.17656600 | C | 2.56777800  | -2.93520500 | -2.03303900 |
| H  | -1.96504200 | -3.08792400 | -1.73488400 | C | -0.57171900 | -4.44622300 | -1.61501700 |
| H  | -1.19560500 | -4.68524200 | -1.67005300 | C | 0.18746000  | 5.74309800  | -1.07292700 |
| C  | -0.46444600 | -3.48889100 | 2.26830000  | C | 0.79576000  | -0.17698400 | -3.84124900 |
| C  | -0.39544600 | -4.89151900 | 2.15915000  | C | 5.95196700  | -0.56889700 | -0.23284700 |
| C  | -1.65421100 | -2.89048700 | 2.71842700  | C | 5.50944100  | -1.39262900 | 1.99781500  |
| C  | -1.49976800 | -5.67211100 | 2.49305300  | C | 3.43993700  | 2.33677200  | 0.56739200  |
| H  | 0.51948000  | -5.35217900 | 1.80099800  | C | 2.98103500  | 1.58259800  | 3.21784200  |
| C  | -2.75396200 | -3.67806900 | 3.04841700  | C | 4.46904200  | 2.41491700  | 1.50385900  |
| H  | -1.71156900 | -1.81273200 | 2.79003700  | C | 1.82972000  | -1.84555400 | 2.40323700  |
| C  | -2.68182300 | -5.06954700 | 2.93380700  | C | 3.17578500  | -1.86928300 | 2.67696200  |
| H  | -1.43990800 | -6.75266900 | 2.40255100  | C | 3.65354100  | -1.03936700 | 0.41878200  |
| H  | -3.66815900 | -3.20462600 | 3.39438000  | C | -1.37324500 | -3.98937200 | -2.66580800 |
| H  | -3.54258000 | -5.68161000 | 3.18653500  | C | -1.89118300 | -1.55994400 | 4.70409500  |
| H  | 2.87299200  | -2.21707500 | 1.69354700  | C | -0.30205800 | -3.61784700 | -0.52704500 |
| H  | 3.26240100  | -3.14743800 | -0.70401600 | C | 1.56714300  | -2.40268000 | -4.59672700 |
|    |             |             |             | C | 2.24928900  | -1.03928600 | 0.14248400  |
|    |             |             |             | C | 1.08008600  | 6.02265000  | -2.11007200 |
|    |             |             |             | C | 1.80608400  | 3.71311000  | -2.10973300 |
| P  | -0.46636900 | -1.17525300 | 0.88870400  | C | -1.65728200 | -1.87854900 | -1.52876300 |
| P  | 0.80772900  | 1.78483500  | -0.26696300 | C | 2.19329400  | -3.60062300 | -4.33554800 |

**7-a-ts**

|    |             |             |             |
|----|-------------|-------------|-------------|
| C  | 4.61080900  | -0.60894600 | -0.54122800 |
| C  | -2.81212300 | -3.40541500 | 3.44227300  |
| C  | -1.91948100 | -2.70551200 | -2.62108700 |
| H  | 0.98422500  | 1.11111000  | 2.57251800  |
| H  | 7.46926400  | -0.92227200 | 1.27808900  |
| H  | -0.60621300 | 4.22931100  | 0.23776900  |
| H  | -0.57258100 | -0.24648300 | 3.63036400  |
| H  | -2.19777700 | -3.54581800 | 1.38579700  |
| H  | 0.21158500  | 1.72164100  | -3.07749200 |
| H  | 3.18947500  | -4.81225600 | -2.83866800 |
| H  | 2.58195900  | 5.21915600  | -3.43455700 |
| H  | 2.94804300  | -3.15863700 | -1.04394600 |
| H  | -0.14065700 | -5.44209900 | -1.65345000 |
| H  | -0.44294100 | 6.52911900  | -0.66718300 |
| H  | 0.39403800  | 0.01237900  | -4.83288800 |
| H  | 6.66661700  | -0.22616700 | -0.97547500 |
| H  | 5.84653900  | -1.69652800 | 2.98525500  |
| H  | 3.62773100  | 2.63252200  | -0.45878800 |
| H  | 2.79984100  | 1.27915200  | 4.24468100  |
| H  | 5.45022700  | 2.76317100  | 1.19543300  |
| H  | 1.12691500  | -2.16098700 | 3.16454500  |
| H  | 3.53131500  | -2.20383000 | 3.64777700  |
| H  | -1.80602300 | -1.00199700 | 5.63206500  |
| H  | 0.34250800  | -3.96646300 | 0.27402500  |
| H  | 1.16986800  | -2.18667500 | -5.58482400 |
| H  | 2.43850400  | 2.93147100  | -2.51775200 |
| H  | -2.07120500 | -0.87650600 | -1.48804000 |
| H  | 2.29818000  | -4.34555700 | -5.11890400 |
| H  | 4.27158800  | -0.29269400 | -1.52093300 |
| H  | -3.44360200 | -4.28733900 | 3.38522700  |
| H  | -2.54058100 | -2.34423300 | -3.43547100 |
| H  | 5.04730300  | 2.09718900  | 3.55676400  |
| H  | 1.14609500  | 7.02847400  | -2.51465300 |
| H  | -1.56620800 | -4.63285100 | -3.51915500 |
| H  | -3.25775500 | -3.01921500 | 5.51579400  |
| Rh | -1.32837900 | 0.97917500  | 0.21446800  |
| C  | -3.37054200 | 1.46171800  | -0.43538100 |
| C  | -2.46312700 | 2.32018200  | -0.79067900 |
| C  | -1.46412700 | 2.52957100  | 3.02664300  |
| H  | -2.16576500 | 2.57491600  | 3.86950900  |
| H  | -0.48336900 | 2.22526900  | 3.39878700  |

|   |             |             |             |
|---|-------------|-------------|-------------|
| C | -1.98657300 | 1.61749400  | 1.99113400  |
| C | -3.04956500 | 0.97566100  | 1.62676800  |
| C | -4.18733600 | 0.21977000  | 2.19929800  |
| H | -5.15318200 | 0.53569300  | 1.79745800  |
| H | -4.07629200 | -0.85428400 | 2.01687500  |
| H | -4.18880100 | 0.37367600  | 3.28503600  |
| C | -4.66905200 | 0.90108800  | -0.76747300 |
| C | -5.72022200 | 1.77254600  | -1.10730000 |
| C | -4.89481800 | -0.48564200 | -0.78721400 |
| C | -6.96268400 | 1.26127300  | -1.47759700 |
| H | -5.55156500 | 2.84485200  | -1.07781700 |
| C | -6.13887200 | -0.99003400 | -1.15838000 |
| H | -4.09312100 | -1.15954100 | -0.50750700 |
| C | -7.17614500 | -0.11986200 | -1.50505700 |
| H | -7.76706400 | 1.94238800  | -1.74019700 |
| H | -6.29981500 | -2.06419200 | -1.17388100 |
| H | -8.14658700 | -0.51522600 | -1.79066000 |
| H | -2.33152300 | 3.15252100  | -1.46864600 |
| H | -1.36080800 | 3.54287600  | 2.61590100  |

## 1e

|   |             |             |            |
|---|-------------|-------------|------------|
| C | 0.36608500  | -3.73884300 | 5.25387400 |
| H | -0.22891400 | -3.77902300 | 6.17688300 |
| H | -0.32756400 | -3.95286100 | 4.42890500 |
| C | 0.99341900  | -2.38508500 | 5.08368800 |
| C | 2.29658600  | -2.09288700 | 4.98366500 |
| C | 3.45649500  | -3.04605900 | 5.01703900 |
| H | 3.14924200  | -4.08790400 | 5.14370500 |
| H | 4.04345000  | -2.97811900 | 4.09051600 |
| H | 4.14294800  | -2.79526700 | 5.83763800 |
| H | 1.10051100  | -4.54824500 | 5.29281500 |
| H | 0.28716300  | -1.55487500 | 5.03845400 |
| H | 2.56872100  | -1.04339000 | 4.86294600 |

## 2-a

|   |            |             |             |
|---|------------|-------------|-------------|
| C | 3.66920000 | -1.31380900 | -0.10235300 |
| C | 5.07274700 | -0.77884500 | -0.07685500 |
| C | 3.18345000 | -0.89831200 | 2.37161200  |
| C | 2.86431600 | -1.42632000 | 0.99986600  |

|    |             |             |             |   |             |             |             |
|----|-------------|-------------|-------------|---|-------------|-------------|-------------|
| H  | 3.41723800  | -1.89297600 | -0.98619900 | C | -1.21368900 | -3.66162800 | 0.08116000  |
| O  | 5.39998200  | 0.05585000  | -1.17953300 | C | -0.66115600 | -3.34034800 | 2.79918100  |
| C  | 4.85753900  | 1.34983100  | -1.01348200 | C | -1.70954400 | -4.57757200 | 1.00683200  |
| H  | 5.22618000  | 1.79228700  | -0.07290600 | C | -1.19529500 | 0.79414400  | 2.84440100  |
| H  | 2.08448300  | -2.17654800 | 0.95956400  | C | -2.01146600 | 0.05802900  | 3.66731200  |
| C  | 3.37601900  | 1.42612000  | -1.03421000 | C | -3.08822700 | -0.95241600 | 1.70621900  |
| C  | 2.37846300  | 2.16050600  | -1.28110600 | C | -2.85535600 | 3.63040900  | -2.72835800 |
| H  | 5.24160700  | 1.94933000  | -1.84548600 | C | 2.23518800  | 3.48397200  | 3.17448600  |
| C  | 1.92374900  | 3.49724000  | -1.72837400 | C | -2.26284300 | 3.18470700  | -0.42697800 |
| H  | 2.80406600  | 4.12111400  | -1.92539300 | C | -5.04584100 | 0.63158600  | -3.20033100 |
| H  | 1.32779300  | 3.44043700  | -2.64249000 | C | -2.25508500 | -0.14708000 | 0.85852200  |
| H  | 1.31455900  | 3.99868000  | -0.97193000 | C | 2.70049100  | -3.53279800 | -3.90430300 |
| Rh | 1.65484900  | 0.34024700  | -0.35856200 | C | 1.52674700  | -1.56769600 | -3.12568200 |
| P  | -0.08142300 | 1.59782300  | 0.37831100  | C | -0.92797900 | 2.26210600  | -2.22020400 |
| P  | 0.14339300  | -1.34996800 | -0.72642500 | C | -5.99777800 | 1.25013500  | -2.42251300 |
| C  | -0.41794700 | -2.58645400 | 0.50912200  | C | -4.01793700 | -1.89580200 | 1.18648300  |
| C  | -0.15499300 | -2.42827700 | 1.87351800  | C | 0.77939900  | 5.18980000  | 2.27727200  |
| C  | -3.85746700 | 0.11459000  | -2.61966100 | C | -1.77308900 | 2.85725100  | -3.15474900 |
| C  | -1.47007000 | -0.83670400 | -1.44715800 | H | 0.40232000  | -1.56732200 | 2.21843600  |
| C  | -4.69498300 | -2.52005100 | 3.43120600  | H | -5.32000100 | -3.12629600 | 4.08038700  |
| C  | -2.97060300 | -0.83501900 | 3.12856900  | H | 1.05624700  | -4.19583600 | -1.00394100 |
| C  | -1.43395600 | -4.41872600 | 2.36782400  | H | 1.99695800  | 1.51706100  | 2.33886600  |
| C  | 0.60540200  | 2.91129400  | 1.46356400  | H | -0.60630800 | 4.56156000  | 0.76504900  |
| C  | 1.40197200  | -3.63112100 | -1.86155700 | H | -0.96029700 | -1.45906700 | -3.46281100 |
| C  | 1.64778300  | 2.54317500  | 2.33080800  | H | -6.54593500 | 1.87560600  | -0.41943800 |
| C  | 1.03681500  | -2.28768700 | -2.01905500 | H | 2.71005000  | -1.62589200 | -4.91854800 |
| C  | 1.80283700  | 4.81275400  | 3.14742200  | H | -4.50409200 | 1.01516300  | 0.62860200  |
| C  | -1.15705000 | 2.43065700  | -0.84966800 | H | -3.95236900 | 4.37161500  | -1.02497500 |
| C  | 0.17931500  | 4.24592200  | 1.44012800  | H | 2.50898400  | -5.28927000 | -2.66821100 |
| C  | -1.30643400 | 0.70132300  | 1.43065500  | H | -3.03622000 | -0.63356200 | -4.47515600 |
| C  | -2.43655800 | -0.25572100 | -0.62663800 | H | -5.49693800 | -3.37638100 | 1.60741800  |
| C  | -1.70348400 | -0.97841600 | -2.83932100 | H | -3.69325600 | -1.52045900 | 5.04520500  |
| C  | -5.79555800 | 1.37879500  | -1.02751000 | H | -1.45289000 | -3.77640600 | -0.97172100 |
| C  | -3.64810800 | 0.24235300  | -1.20851800 | H | -0.46583600 | -3.19498300 | 3.85729300  |
| C  | 2.34393300  | -2.19032400 | -4.06600900 | H | -2.32416100 | -5.40610300 | 0.66736800  |
| C  | -4.65162200 | 0.89125400  | -0.43697900 | H | -0.46477600 | 1.46398700  | 3.28103200  |
| C  | -3.09824800 | 3.79290700  | -1.36305000 | H | -1.92529700 | 0.14956900  | 4.74665900  |
| C  | 2.23020600  | -4.24821000 | -2.80248600 | H | 3.03380300  | 3.18107000  | 3.84554900  |
| C  | -2.86633900 | -0.51922300 | -3.40804600 | H | -2.48774600 | 3.27611500  | 0.63080000  |
| C  | -4.79926800 | -2.65721600 | 2.02657000  | H | -5.18506200 | 0.52903400  | -4.27314200 |
| C  | -3.79548000 | -1.62780700 | 3.96867600  | H | 1.27740900  | -0.51738400 | -3.24076300 |

|   |             |             |             |   |             |             |             |
|---|-------------|-------------|-------------|---|-------------|-------------|-------------|
| H | -0.10311000 | 1.63910500  | -2.54690600 | C | 3.18036600  | -0.49059900 | -2.89834600 |
| H | -6.90325900 | 1.64359000  | -2.87513400 | C | 1.81420200  | -4.09438800 | -2.75815000 |
| H | -4.10005000 | -2.02467500 | 0.11451100  | C | -0.93303200 | 2.84766100  | -1.58125800 |
| H | 0.44439700  | 6.22235500  | 2.24332000  | C | -1.31196600 | -4.05731400 | 1.28965200  |
| H | -1.59423800 | 2.70461200  | -4.21499800 | C | -1.74801800 | 2.40019400  | -2.63560000 |
| H | -1.83500800 | -5.12458400 | 3.08906200  | C | -1.22083100 | -2.68250500 | 1.54373600  |
| H | 3.34566400  | -4.01547300 | -4.63250200 | C | -2.17795200 | 4.68394800  | -3.30129900 |
| H | -3.51726100 | 4.08962100  | -3.45652200 | C | 0.58107800  | 2.47686900  | 0.90743900  |
| H | 2.26532700  | 5.54987200  | 3.79733700  | C | -0.75936400 | 4.22469700  | -1.39123900 |
| H | 5.29507400  | -0.25751400 | 0.86293400  | C | 1.18562800  | 0.83019200  | -1.38403800 |
| H | 5.74857500  | -1.63959500 | -0.15075100 | C | 2.09593800  | -0.14128500 | 0.76463200  |
| H | 3.76744500  | 0.02494100  | 2.34158700  | C | 1.13110400  | -1.04864300 | 2.81065800  |
| H | 2.27168900  | -0.70763300 | 2.94431300  | C | 5.15902400  | 1.81217300  | 1.72500100  |
| H | 3.76555300  | -1.64436100 | 2.93191500  | C | 3.14314200  | 0.45662800  | 1.54017900  |

### 3-a-ts

|    |             |             |             |   |             |             |             |
|----|-------------|-------------|-------------|---|-------------|-------------|-------------|
| C  | -3.90445500 | -1.19750500 | -0.08149100 | C | -2.09685500 | -4.87401700 | 2.10798700  |
| C  | -5.36625800 | -1.09964500 | -0.49942000 | C | 2.13116700  | -0.48736100 | 3.56663700  |
| C  | -3.18895000 | -1.14881500 | -2.53568000 | C | 5.04300900  | -2.15558300 | -1.61673200 |
| C  | -2.90151200 | -1.49329500 | -1.08912700 | C | 4.17807700  | -1.16932100 | -3.64645700 |
| H  | -3.79521600 | -1.75362500 | 0.84641900  | C | 1.42099500  | -3.53884800 | -0.43697700 |
| O  | -6.09632800 | -0.36880200 | 0.46344500  | C | 0.89221200  | -3.12213300 | -3.14919800 |
| C  | -5.47077300 | 0.89175900  | 0.54935700  | C | 2.07588400  | -4.30277000 | -1.40102000 |
| H  | -5.73996500 | 1.51180000  | -0.32260100 | C | 1.25282800  | 0.98048100  | -2.79496300 |
| H  | -2.40733600 | -2.45191600 | -0.95010200 | C | 2.22300600  | 0.34222600  | -3.52835000 |
| C  | -3.97613800 | 0.74398300  | 0.59908300  | C | 3.12900100  | -0.65454300 | -1.47684300 |
| C  | -3.00154200 | 1.54735100  | 0.88239700  | C | 1.87910200  | 3.77963000  | 3.01714400  |
| H  | -5.82475900 | 1.39026900  | 1.45647500  | C | -2.35809300 | 3.31128300  | -3.49534800 |
| C  | -2.92531400 | 2.95003400  | 1.37865900  | C | 1.64265400  | 3.35747700  | 0.64791700  |
| H  | -3.92860200 | 3.33950800  | 1.59170700  | C | 4.17930300  | 0.89049200  | 3.73323800  |
| H  | -2.32537700 | 3.02361700  | 2.28987300  | C | 2.11694400  | 0.02861000  | -0.72373800 |
| H  | -2.45550500 | 3.60046100  | 0.63367100  | C | -2.79534000 | -4.32973400 | 3.18586700  |
| Rh | -1.88893200 | 0.08194100  | -0.03092700 | C | -1.94577300 | -2.13800100 | 2.62022500  |
| P  | -0.22796800 | 1.57758000  | -0.46119900 | C | 0.18840100  | 2.24109800  | 2.23025800  |
| P  | -0.33197000 | -1.52572400 | 0.43054400  | C | 5.16481900  | 1.63764300  | 3.12965500  |
| C  | 0.48334100  | -2.56991300 | -0.82724600 | C | 4.08451400  | -1.51351300 | -0.86548200 |
| C  | 0.22784000  | -2.36351400 | -2.18610100 | C | -1.38193200 | 5.13583800  | -2.24842200 |
| C  | 3.15325200  | 0.28389300  | 2.96153400  | C | 0.83534300  | 2.89004000  | 3.28082000  |
| C  | 1.09446900  | -0.87363700 | 1.40219600  | H | -0.45666400 | -1.58128500 | -2.48486100 |
| C  | 5.09460900  | -1.98297100 | -3.02050400 | H | 5.85544500  | -2.49803500 | -3.59970300 |

|            |             |             |             |    |             |             |             |
|------------|-------------|-------------|-------------|----|-------------|-------------|-------------|
| H          | -0.78092300 | -4.49619500 | 0.45339500  | C  | 3.18598600  | -1.23596900 | 0.68800800  |
| H          | -1.89991100 | 1.33620700  | -2.78110800 | H  | 3.52539300  | -1.63362400 | -1.35679500 |
| H          | -0.15358800 | 4.59465300  | -0.57318300 | C  | 2.59748200  | 1.26628800  | -3.07910600 |
| H          | 0.36696300  | -1.63868400 | 3.29952500  | H  | 2.85112300  | 2.08092000  | -3.76887200 |
| H          | 5.93403000  | 2.41037400  | 1.25477300  | H  | 2.61660900  | -2.15693500 | 0.78378400  |
| H          | -3.26460400 | -2.52280000 | 4.27273500  | C  | 2.68463200  | 1.74683100  | -1.68979000 |
| H          | 4.17306200  | 1.40017100  | -0.11981400 | C  | 3.05488700  | 2.36189200  | -0.69288600 |
| H          | 3.10436700  | 4.68903600  | 1.49154900  | H  | 1.60371700  | 0.89602000  | -3.33942500 |
| H          | -2.16051200 | -5.93759500 | 1.89728600  | C  | 3.67074200  | 3.21132400  | 0.32567200  |
| H          | 2.14794500  | -0.63219200 | 4.64338900  | H  | 4.53888900  | 3.72169900  | -0.11123000 |
| H          | 5.76029000  | -2.80932700 | -1.12912000 | H  | 2.97814700  | 3.97299200  | 0.69201300  |
| H          | 4.19976400  | -1.03290700 | -4.72423000 | H  | 4.01821400  | 2.62921300  | 1.18364800  |
| H          | 1.64643400  | -3.68719600 | 0.61492100  | Rh | 1.67736700  | 0.21966600  | -0.25518700 |
| H          | 0.70105700  | -2.94187700 | -4.20292200 | P  | -0.10686600 | 1.57089800  | 0.34346100  |
| H          | 2.80380000  | -5.04772500 | -1.09393900 | P  | 0.27024000  | -1.53001600 | -0.49786200 |
| H          | 0.53709000  | 1.61530100  | -3.30195500 | C  | -0.34572800 | -2.45478500 | 0.95478900  |
| H          | 2.26774500  | 0.47308200  | -4.60616000 | C  | 0.12492000  | -2.12976300 | 2.23219100  |
| H          | -2.97708600 | 2.95010300  | -4.31159300 | C  | -3.43031000 | -0.01757200 | -2.94022500 |
| H          | 1.98150900  | 3.51578900  | -0.37134600 | C  | -1.26035900 | -1.03228800 | -1.41712700 |
| H          | 4.16801300  | 0.75101600  | 4.81078500  | C  | -5.00288000 | -2.42058400 | 3.11968100  |
| H          | -1.91476600 | -1.06857900 | 2.80551200  | C  | -3.25330900 | -0.74460400 | 2.92441400  |
| H          | -0.60070300 | 1.52554600  | 2.43139300  | C  | -1.26876700 | -3.85345500 | 3.19641700  |
| H          | 5.94645000  | 2.09769800  | 3.72714600  | C  | 0.57510600  | 2.81860900  | 1.50131100  |
| H          | 4.04825200  | -1.67087900 | 0.20526300  | C  | 1.22835500  | -4.14190900 | -1.12031200 |
| H          | -1.24329100 | 6.20089700  | -2.08683900 | C  | 1.39579300  | 2.35633400  | 2.54492000  |
| H          | 0.53461100  | 2.68892500  | 4.30475700  | C  | 1.08156100  | -2.81303400 | -1.54137500 |
| H          | 2.33848300  | -4.67977400 | -3.50768300 | C  | 1.73804600  | 4.62304300  | 3.31008300  |
| H          | -3.40337500 | -4.96788900 | 3.82034400  | C  | -1.08638300 | 2.51013000  | -0.88168400 |
| H          | 2.38825700  | 4.27904800  | 3.83601300  | C  | 0.35873500  | 4.19524100  | 1.36357400  |
| H          | -2.65881300 | 5.39578900  | -3.96583300 | C  | -1.42261700 | 0.72501400  | 1.33596800  |
| H          | -5.78122900 | -2.11165900 | -0.52894400 | C  | -2.29396100 | -0.35833000 | -0.76625000 |
| H          | -5.47244700 | -0.64079000 | -1.49045900 | C  | -1.32259200 | -1.21502200 | -2.82553100 |
| H          | -3.61029000 | -0.14460700 | -2.64080800 | C  | -5.51621600 | 1.35826300  | -1.66138100 |
| H          | -2.28780200 | -1.20211400 | -3.15043900 | C  | -3.39805300 | 0.16220400  | -1.52065700 |
| H          | -3.91303400 | -1.85857200 | -2.96360700 | C  | 2.35923000  | -3.34215600 | -3.54567200 |
|            |             |             |             | C  | -4.47038600 | 0.87085000  | -0.91031700 |
|            |             |             |             | C  | -2.96823300 | 3.93741100  | -1.42534400 |
|            |             |             |             | C  | 1.92762400  | -5.06103300 | -1.90723600 |
|            |             |             |             | C  | -2.37061900 | -0.72122900 | -3.56288000 |
|            |             |             |             | C  | -4.98671600 | -2.59375500 | 1.71482900  |
|            |             |             |             | C  | -4.15155900 | -1.51444900 | 3.70980200  |
| <b>2-b</b> |             |             |             |    |             |             |             |
| C          | 3.75912400  | -0.96125800 | -0.53722500 |    |             |             |             |
| C          | 4.98854800  | -0.11779000 | -0.73275700 |    |             |             |             |
| C          | 3.64547100  | -0.63816800 | 1.99172300  |    |             |             |             |



|   |             |             |             |               |             |             |             |
|---|-------------|-------------|-------------|---------------|-------------|-------------|-------------|
| C | -1.28778400 | -3.48413200 | 0.80658500  | H             | 0.06759300  | 1.81820500  | -2.55493900 |
| C | -0.33618500 | -2.82549800 | 3.34957400  | H             | -6.37388300 | 1.56873400  | -3.64396600 |
| C | -1.74112500 | -4.18356200 | 1.92335800  | H             | -4.11015700 | -2.02320600 | -0.14323700 |
| C | -1.48645300 | 0.90897600  | 2.74304000  | H             | 0.76805200  | 6.15712300  | 2.14514800  |
| C | -2.37252700 | 0.19512000  | 3.51264100  | H             | -1.30305000 | 3.00234900  | -4.24392800 |
| C | -3.22884600 | -0.92013700 | 1.50410500  | H             | -1.63354800 | -4.39130300 | 4.06656000  |
| C | -2.64772700 | 3.84620100  | -2.78276000 | H             | 3.02672800  | -5.38619000 | -3.73352800 |
| C | 1.96357800  | 3.25066500  | 3.44973000  | H             | -3.26106700 | 4.35517700  | -3.52049600 |
| C | -2.19822400 | 3.26579900  | -0.47797800 | H             | 2.18544900  | 5.32290400  | 4.00980200  |
| C | -4.51777200 | 0.50384300  | -3.68953300 | H             | 3.97629500  | 0.39837100  | 1.88494400  |
| C | -2.29605000 | -0.16770100 | 0.71791700  | H             | 2.85374600  | -0.67077500 | 2.74577500  |
| C | 2.48700400  | -4.66834000 | -3.12279000 | H             | 4.49476600  | -1.21692300 | 2.38576300  |
| C | 1.67661100  | -2.42072600 | -2.75464400 | H             | 5.00760600  | 0.36887100  | -1.71130800 |
| C | -0.76861300 | 2.42661500  | -2.24084300 | H             | 5.10831800  | 0.65045300  | 0.03373000  |
| C | -5.54376300 | 1.17523900  | -3.06457500 | H             | 5.86986500  | -0.77469800 | -0.68281500 |
| C | -4.12180800 | -1.86642200 | 0.92834800  | H             | 3.30699400  | 0.44717300  | -3.23887000 |
| C | 0.94123100  | 5.09139300  | 2.26401100  |               |             |             |             |
| C | -1.54817100 | 3.08875300  | -3.18934800 |               |             |             |             |
| H | 0.82864700  | -1.31347000 | 2.34702200  |               |             |             |             |
| H | -5.68683200 | -3.00555500 | 3.72767600  |               |             |             |             |
| H | 0.80548300  | -4.46848100 | -0.17840300 |               |             |             |             |
| H | 1.58676100  | 1.29260600  | 2.64586900  |               |             |             |             |
| H | -0.25466700 | 4.57521000  | 0.55524500  |               |             |             |             |
| H | -0.54273900 | -1.76680800 | -3.33177000 |               |             |             |             |
| H | -6.32295900 | 1.89803200  | -1.17407900 |               |             |             |             |
| H | 2.80259800  | -3.02096700 | -4.48376800 |               |             |             |             |
| H | -4.45537700 | 1.03573700  | 0.15980200  |               |             |             |             |
| H | -3.83123000 | 4.51455800  | -1.10685200 |               |             |             |             |
| H | 2.03276900  | -6.08589500 | -1.56317700 |               |             |             |             |
| H | -2.40143700 | -0.87681800 | -4.63794900 |               |             |             |             |
| H | -5.65703000 | -3.31398600 | 1.25477600  |               |             |             |             |
| H | -4.15129500 | -1.37098500 | 4.78700000  |               |             |             |             |
| H | -1.67300300 | -3.72948400 | -0.17846000 |               |             |             |             |
| H | 0.02334800  | -2.55624100 | 4.33850800  |               |             |             |             |
| H | -2.47687000 | -4.97275500 | 1.80227300  |               |             |             |             |
| H | -0.83150700 | 1.62377600  | 3.22280800  |               |             |             |             |
| H | -2.40597600 | 0.34599800  | 4.58829400  |               |             |             |             |
| H | 2.58891300  | 2.87809800  | 4.25597100  |               |             |             |             |
| H | -2.46938800 | 3.31548200  | 0.57209700  |               |             |             |             |
| H | -4.52184800 | 0.35819100  | -4.76644600 |               |             |             |             |
| H | 1.61995600  | -1.38559300 | -3.07187200 |               |             |             |             |
|   |             |             |             | <b>3-b-ts</b> |             |             |             |
|   |             |             |             | C             | -3.89707100 | -1.21754900 | -0.46169900 |
|   |             |             |             | C             | -5.32397300 | -0.95140000 | -0.93197200 |
|   |             |             |             | C             | -3.14056100 | -0.41686300 | -2.79725000 |
|   |             |             |             | C             | -2.86009800 | -1.11857700 | -1.49470200 |
|   |             |             |             | H             | -3.80834100 | -2.09707000 | 0.16960500  |
|   |             |             |             | C             | -4.94078200 | -0.24311100 | 1.95889600  |
|   |             |             |             | H             | -4.92004600 | -1.33236500 | 2.04561000  |
|   |             |             |             | H             | -2.31456600 | -2.05104200 | -1.63602000 |
|   |             |             |             | C             | -3.97268500 | 0.27118800  | 0.94080700  |
|   |             |             |             | C             | -3.42583200 | 1.39772300  | 0.58554900  |
|   |             |             |             | H             | -5.96941100 | 0.06673900  | 1.74429400  |
|   |             |             |             | C             | -3.58466000 | 2.84624500  | 0.87186000  |
|   |             |             |             | H             | -2.69727200 | 3.24726000  | 1.37403400  |
|   |             |             |             | H             | -3.69618500 | 3.41302400  | -0.06089500 |
|   |             |             |             | H             | -4.46278200 | 3.04427400  | 1.50082100  |
|   |             |             |             | Rh            | -1.98010100 | 0.05545600  | -0.02491600 |
|   |             |             |             | P             | -0.31304900 | 1.60821900  | -0.50733600 |
|   |             |             |             | P             | -0.41931200 | -1.64802300 | 0.23665500  |
|   |             |             |             | C             | 0.51550500  | -2.43448500 | -1.12465900 |
|   |             |             |             | C             | 0.29049000  | -2.04291400 | -2.44989300 |
|   |             |             |             | C             | 2.68047300  | 0.15322900  | 3.22469700  |
|   |             |             |             | C             | 0.88866000  | -1.02263500 | 1.37413700  |

|   |             |             |             |   |             |             |             |
|---|-------------|-------------|-------------|---|-------------|-------------|-------------|
| C | 5.38051600  | -1.67533900 | -2.59688400 | H | 6.21815800  | -2.13844900 | -3.11022700 |
| C | 3.44276600  | -0.20787500 | -2.60915700 | H | -0.56341000 | -4.63727800 | -0.16090100 |
| C | 2.00089700  | -3.57431800 | -3.20743000 | H | -1.47988100 | 1.66912300  | -3.16920000 |
| C | -0.89285000 | 2.99134400  | -1.56646700 | H | -0.49076100 | 4.57538500  | -0.15074100 |
| C | -1.20003600 | -4.36273000 | 0.67147600  | H | 0.01670700  | -1.95924600 | 3.12801600  |
| C | -1.45347800 | 2.69396300  | -2.82004800 | H | 5.52868600  | 2.49289600  | 1.97025400  |
| C | -1.26843900 | -3.03107300 | 1.10180600  | H | -3.53388100 | -3.42637000 | 3.62681200  |
| C | -1.97781900 | 5.02842200  | -3.17133900 | H | 3.98297700  | 1.49813400  | 0.34985000  |
| C | 0.26260900  | 2.40834600  | 1.03486600  | H | 2.63740200  | 4.53962100  | 2.22375600  |
| C | -0.89741500 | 4.32060000  | -1.12163900 | H | -1.89868400 | -6.37692300 | 0.95499600  |
| C | 1.23887400  | 0.96930400  | -1.27230000 | H | 1.55655300  | -0.92441700 | 4.72598100  |
| C | 1.89436000  | -0.17931200 | 0.89798200  | H | 5.81255800  | -2.63813500 | -0.70228600 |
| C | 0.78403200  | -1.28670800 | 2.76614500  | H | 4.69970100  | -0.59639400 | -4.32287200 |
| C | 4.73384100  | 1.83799900  | 2.31529900  | H | 1.70296200  | -3.68451200 | 0.17858300  |
| C | 2.81769200  | 0.41383200  | 1.82361500  | H | 0.86070000  | -2.28565100 | -4.50916800 |
| C | -2.87903300 | -3.69444300 | 2.80277600  | H | 2.99908400  | -4.70364800 | -1.66389900 |
| C | 3.86884100  | 1.27614100  | 1.40349400  | H | 0.86470800  | 1.93613100  | -3.17871200 |
| C | 1.78805700  | 3.86336100  | 2.22939700  | H | 2.76464200  | 0.90976300  | -4.33219800 |
| C | -1.96071600 | -5.35020600 | 1.30405700  | H | -2.40342400 | 3.45705700  | -4.59046900 |
| C | 1.64900000  | -0.71225900 | 3.66417200  | H | 1.86172100  | 3.52486600  | 0.10547500  |
| C | 5.15120300  | -1.95615600 | -1.22886500 | H | 3.45297000  | 0.55314700  | 5.20221200  |
| C | 4.53948000  | -0.82013100 | -3.27153700 | H | -2.23754100 | -1.67106500 | 2.47556300  |
| C | 1.49984300  | -3.39594900 | -0.84831300 | H | -1.20568500 | 1.40055000  | 2.24156300  |
| C | 1.03087200  | -2.60961100 | -3.48662800 | H | 5.27465000  | 2.03769800  | 4.40798700  |
| C | 2.23287900  | -3.96742500 | -1.88706500 | H | 3.91887200  | -1.62542200 | 0.47858000  |
| C | 1.50656700  | 1.25197500  | -2.63851900 | H | -1.43742800 | 6.35503800  | -1.55957400 |
| C | 2.57350100  | 0.68106200  | -3.28718500 | H | -0.41827500 | 2.40352800  | 4.37366200  |
| C | 3.20357300  | -0.49046000 | -1.22630100 | H | 2.58343900  | -4.00996600 | -4.01375700 |
| C | 1.15494600  | 3.54315400  | 3.43308100  | H | -3.38213500 | -5.79284400 | 2.86348900  |
| C | -1.98169300 | 3.70476000  | -3.62057900 | H | 1.51012400  | 3.97502400  | 4.36405000  |
| C | 1.34982900  | 3.29404200  | 1.03474900  | H | -2.39732800 | 5.81610900  | -3.79041600 |
| C | 3.57881200  | 0.75919000  | 4.14262200  | H | -3.56507800 | 0.57954400  | -2.65228200 |
| C | 2.08226400  | 0.11176300  | -0.56233500 | H | -2.22832500 | -0.32490400 | -3.39317800 |
| C | -2.79431300 | -5.02242600 | 2.37302500  | H | -3.85669900 | -1.00700600 | -3.39019600 |
| C | -2.13431600 | -2.70585700 | 2.16362800  | H | -6.05527000 | -1.09622500 | -0.13664600 |
| C | -0.37367800 | 2.09856000  | 2.24378500  | H | -5.44710400 | 0.05168900  | -1.34586700 |
| C | 4.58873600  | 1.58232100  | 3.69965300  | H | -5.55050600 | -1.67539000 | -1.72603800 |
| C | 4.09016600  | -1.38455000 | -0.56325100 | H | -4.66542900 | 0.17872600  | 2.93308000  |
| C | -1.43841800 | 5.33069700  | -1.92097800 |   |             |             |             |
| C | 0.07197500  | 2.66123600  | 3.43934900  |   |             |             |             |
| H | -0.43157300 | -1.26604300 | -2.66487500 |   |             |             |             |

**TS1-OMe**

|   |             |             |             |   |             |             |             |
|---|-------------|-------------|-------------|---|-------------|-------------|-------------|
| P | 1.18963000  | -0.39930800 | 1.66346800  | C | 2.93201300  | -2.45877000 | 0.85285300  |
| P | 0.30405300  | -0.17263900 | -1.64648700 | C | 7.09493600  | 0.35436300  | -0.46492300 |
| C | -0.13840800 | 1.59659900  | -1.94510500 | C | 2.96525400  | 3.56939300  | -1.41749000 |
| C | -0.97646100 | 2.25707000  | -1.03549100 | C | 0.36315600  | -1.82538600 | 5.40567000  |
| C | 4.97097000  | -0.40739800 | -1.36950600 | C | 4.14531900  | -3.15290300 | 0.86565300  |
| C | 2.14963600  | -0.17930300 | -1.55438600 | H | -1.34089900 | 1.75052800  | -0.14891700 |
| C | 2.36290500  | 5.87197400  | -0.95254400 | H | 2.42382700  | 6.92289600  | -1.21991700 |
| C | 1.54238700  | 4.10668000  | 0.50253000  | H | 1.59095500  | -0.12892500 | -4.36580800 |
| C | -0.87263600 | 4.28019600  | -2.35255600 | H | 2.02204000  | 1.38014800  | 3.98792300  |
| C | 1.01533300  | -0.47066000 | 3.49433600  | H | 0.03068000  | -2.38867600 | 3.35822300  |
| C | 0.69123800  | -0.73167400 | -4.41701200 | H | 2.29755300  | -1.94800200 | -2.79887500 |
| C | 1.54348400  | 0.48663400  | 4.37235900  | H | 6.98618400  | 2.06039100  | 0.86960900  |
| C | -0.07892700 | -0.96183200 | -3.26445600 | H | -2.45725600 | -2.98097600 | -4.64165400 |
| C | 0.87526000  | -0.85786500 | 6.27337600  | H | 4.55034200  | 2.28487200  | 0.71555600  |
| C | 2.81419800  | -1.24750000 | 1.53888800  | H | 5.98063000  | -1.01444000 | 2.77202500  |
| C | 0.43306100  | -1.63280500 | 4.02631000  | H | 0.93514800  | -1.11167800 | -6.51773300 |
| C | 1.44025000  | 1.37065900  | 1.22505700  | H | 4.73452400  | -2.12622100 | -2.66025000 |
| C | 2.85439100  | 0.71669500  | -0.74807700 | H | 3.60467200  | 5.22305100  | -2.60787000 |
| C | 2.85208300  | -1.21496600 | -2.23004700 | H | 1.09381800  | 6.20616900  | 0.74562500  |
| C | 6.42029200  | 1.37714000  | 0.24286600  | H | 0.99365400  | 1.82639900  | -3.77287700 |
| C | 4.28396300  | 0.62640500  | -0.65806100 | H | -1.99554000 | 4.07690400  | -0.52100200 |
| C | -1.57734000 | -2.34638500 | -4.58734200 | H | 0.35183000  | 4.17067600  | -4.12556200 |
| C | 5.05197600  | 1.50656800  | 0.15370200  | H | 0.09568000  | 2.04530300  | 2.79624300  |
| C | 5.12676600  | -1.42606000 | 2.24212500  | H | 0.21158600  | 4.41796000  | 2.18055700  |
| C | 0.32657700  | -1.29878900 | -5.63769900 | H | 1.87681300  | 1.04657000  | 6.42141200  |
| C | 4.21659200  | -1.32213700 | -2.14457100 | H | 3.83790100  | 0.20258900  | 2.77854900  |
| C | 3.03599400  | 4.90675500  | -1.73829300 | H | 6.88335400  | -1.31782800 | -1.79355500 |
| C | 1.62589300  | 5.47638400  | 0.14115900  | H | -1.81173000 | -1.97714700 | -2.48742000 |
| C | 0.33182700  | 2.30427500  | -3.06078700 | H | 2.09391000  | -2.83444000 | 0.27951900  |
| C | -1.34557300 | 3.58580600  | -1.23905100 | H | 8.17348200  | 0.25913800  | -0.37914800 |
| C | -0.03128100 | 3.63495200  | -3.26194000 | H | 3.47178100  | 2.83829700  | -2.03608200 |
| C | 0.70650200  | 2.35084700  | 1.95424900  | H | -0.09255200 | -2.72873500 | 5.80073800  |
| C | 0.76423200  | 3.67781200  | 1.60808500  | H | 4.23095800  | -4.08909000 | 0.32094900  |
| C | 2.23177200  | 3.12789700  | -0.28237700 | H | -1.15073900 | 5.31837000  | -2.50866900 |
| C | 5.24261500  | -2.63949800 | 1.55546400  | H | -1.08957000 | -2.54991900 | -6.67879500 |
| C | 1.46694600  | 0.29459900  | 5.75318700  | H | 6.18674500  | -3.17676000 | 1.55820000  |
| C | 3.91823900  | -0.73653300 | 2.24170800  | H | 0.81785300  | -1.00415400 | 7.34803500  |
| C | 6.38107200  | -0.52068200 | -1.25207400 | C | -2.48033500 | -3.02079300 | 0.61435700  |
| C | 2.15551500  | 1.74453100  | 0.08672700  | C | -3.06839600 | -4.39777100 | 0.21029000  |
| C | -0.80972100 | -2.10648900 | -5.72751500 | C | -2.34032600 | -4.99128500 | -0.96528300 |
| C | -1.21313100 | -1.77812000 | -3.36611300 | C | -1.16057300 | -4.54789200 | -1.42037800 |

C -0.39371500 -3.46367300 -0.77718100  
C -0.98456400 -2.77615400 0.42797000  
H -2.74177200 -2.82795600 1.66287000  
H -2.84532900 -5.82026100 -1.45787500  
H -0.67698200 -5.00135000 -2.28165800  
C -3.16799300 -5.39407900 1.35632700  
H -3.77473500 -4.96896400 2.16274200  
H -3.63246100 -6.32731400 1.02104200  
H -2.17006100 -5.62289600 1.74451200  
O -4.41387100 -4.07629000 -0.21333100  
C -4.35821600 -2.83691900 -0.92980800  
H -4.17075000 -3.00966400 -2.00172200  
O 0.72959500 -3.20298400 -1.21071900  
C -3.23359900 -2.07272700 -0.28074000  
C -2.78966700 -0.81353300 -0.48688200  
H -5.33059900 -2.34221800 -0.83285900  
C -3.41012700 0.11545400 -1.48965100  
H -3.43278000 1.14994700 -1.14134400  
H -2.82956400 0.10790300 -2.41916400  
H -4.43848900 -0.17802300 -1.73610800  
Rh -0.82961400 -0.69521500 0.41165300  
C -6.36270500 1.37787700 0.93426500  
C -5.33872900 0.46611100 1.09874200  
C -4.02389800 0.90676200 1.36211100  
C -3.77076300 2.28982600 1.43209000  
C -4.79442200 3.21524000 1.26035600  
C -6.09944300 2.76121700 1.00760000  
H -7.37930300 1.05320900 0.73783400  
H -5.53561500 -0.59799600 1.01941800  
H -2.75828500 2.63408000 1.61699800  
H -4.57412400 4.27380600 1.32034200  
C -2.94096400 -0.00797400 1.53013600  
C -1.93230100 -0.49689200 2.14456600  
H -1.65261300 -0.58141600 3.18501700  
H -0.40242300 -3.08669300 1.30114200  
O -7.16324100 3.56818100 0.81713500  
C -6.96185000 4.98377300 0.85180400  
H -7.94141300 5.42486700 0.66258800  
H -6.59771000 5.30694600 1.83349000  
H -6.25963500 5.30091000 0.07270400

## TS2-OMe

C 2.98368900 2.63185200 0.33404200  
C 3.48431400 3.85677500 1.14504800  
C 2.39085500 4.41792300 2.01448600  
C 1.30615700 3.72122500 2.37613500  
C 1.14499200 2.28858200 2.05660400  
C 1.99520200 1.67173200 0.98630300  
H 3.86191200 2.06750300 -0.00555000  
H 2.53436800 5.44272100 2.35188500  
H 0.54990400 4.14026000 3.03375400  
C 4.75512700 3.60066100 1.94183600  
H 5.55350300 3.27338300 1.26754500  
H 5.07998600 4.50993600 2.45828300  
H 4.57888400 2.82040800 2.68926500  
O 3.79385800 4.82373000 0.11659000  
C 2.77471700 4.73080100 -0.88559500  
H 1.94109100 5.41715400 -0.66662500  
O 0.39728100 1.60806500 2.76009100  
C 2.33833600 3.29119800 -0.84628700  
C 1.47305000 2.59867700 -1.62095500  
H 3.20987400 5.02540600 -1.84696600  
C 0.72209100 3.19252800 -2.77724500  
H 1.21643500 4.09936700 -3.14938000  
H 0.63484600 2.48773000 -3.61056500  
H -0.29780800 3.46281000 -2.48258600  
Rh 0.90329100 0.80132200 -0.62530700  
P -1.38795200 1.51693300 -0.14006400  
P 0.20969200 -1.57828400 -0.08117200  
C -0.03414200 -2.27256700 1.58781900  
C 0.32893700 -1.51407300 2.70572600  
C -3.79306700 -2.22839100 -2.46893500  
C -1.40496300 -1.91906900 -0.95152200  
C -4.37930400 -3.07060300 4.08286200  
C -3.33452900 -1.03040400 3.27380700  
C -0.42172300 -3.29625000 4.16085700  
C -1.81945700 3.23312300 0.36028700  
C 1.71811500 -2.51477300 -2.25007900  
C -3.08727800 3.54935100 0.88185500  
C 1.35504300 -2.75373300 -0.91321500  
C -2.48696300 5.89221000 0.98120200

|   |             |             |             |   |             |             |             |
|---|-------------|-------------|-------------|---|-------------|-------------|-------------|
| C | -2.31295800 | 1.31869200  | -1.72152600 | H | -5.27744800 | 1.99595500  | -3.25640200 |
| C | -0.89629600 | 4.26587900  | 0.16153200  | H | 2.89477300  | -3.14491800 | -3.93363700 |
| C | -2.23880800 | 0.49986600  | 1.14719800  | H | -2.55011300 | -3.33283900 | -3.85136500 |
| C | -2.60669600 | -1.41503500 | -0.45553700 | H | -4.71303500 | -4.60704000 | 2.58936700  |
| C | -1.41646900 | -2.62989700 | -2.18359300 | H | -3.91711100 | -1.38170900 | 5.32436600  |
| C | -6.19221300 | -1.11458000 | -1.52572400 | H | -0.89678700 | -4.13162500 | 0.89781400  |
| C | -3.81694100 | -1.54917000 | -1.21129100 | H | 0.39501900  | -1.42385800 | 4.85388100  |
| C | 2.85406900  | -4.66315800 | -0.89123400 | H | -1.22569300 | -5.03997200 | 3.17446600  |
| C | -5.05080800 | -1.00002600 | -0.76438900 | H | -1.93843000 | 2.00960300  | 2.67944200  |
| C | -4.26127000 | 1.63341900  | -3.13260100 | H | -2.87503600 | 0.68899700  | 4.50361900  |
| C | 2.62757000  | -3.34525800 | -2.90004200 | H | -4.39842700 | 5.09552900  | 1.59229100  |
| C | -2.56921600 | -2.78217800 | -2.91467600 | H | -4.14072300 | 2.29190700  | -1.09706300 |
| C | -4.32850200 | -3.60837800 | 2.77535600  | H | -4.94756400 | -2.84621400 | -4.18837500 |
| C | -3.88733500 | -1.80785400 | 4.32510600  | H | 1.69245800  | -4.02994300 | 0.79585200  |
| C | -0.59597200 | -3.54769100 | 1.76211200  | H | -0.66622900 | 0.28088600  | -2.65853700 |
| C | 0.13085200  | -2.02657800 | 3.98954800  | H | -7.07046600 | -1.86440800 | -3.36307100 |
| C | -0.78169800 | -4.05764500 | 3.04455800  | H | -3.73445100 | -3.31859500 | 0.74950000  |
| C | -2.31588100 | 1.02014000  | 2.47128900  | H | -0.49177200 | 6.37266500  | 0.31674500  |
| C | -2.83654100 | 0.27690000  | 3.49889600  | H | -1.79332400 | 0.02396300  | -4.83448900 |
| C | -3.27256600 | -1.57212500 | 1.95207300  | H | -0.58227900 | -3.69089200 | 5.16001200  |
| C | -3.60885200 | 0.99945700  | -4.19167200 | H | 3.92323800  | -5.06163200 | -2.72072600 |
| C | -3.41635100 | 4.86830200  | 1.18785000  | H | -4.11494500 | 0.86914100  | -5.14366800 |
| C | -3.61747900 | 1.79665400  | -1.90598700 | H | -2.74498200 | 6.91897400  | 1.22406100  |
| C | -4.98549000 | -2.33038400 | -3.23271700 | C | 4.85877200  | -2.10508200 | 0.93909600  |
| C | -2.69177400 | -0.78975300 | 0.89569100  | C | 3.81320600  | -1.31694600 | 0.48739100  |
| C | 3.20354700  | -4.42103500 | -2.21932600 | C | 3.86935800  | -0.68685000 | -0.77126500 |
| C | 1.93510900  | -3.83653500 | -0.24174900 | C | 5.02466400  | -0.87921700 | -1.55381500 |
| C | -1.66480300 | 0.68739800  | -2.79359900 | C | 6.07907700  | -1.67142100 | -1.11247000 |
| C | -6.16246800 | -1.78501700 | -2.77240500 | C | 5.99931900  | -2.29521900 | 0.14280300  |
| C | -3.78200500 | -2.88319700 | 1.73976900  | H | 4.80809200  | -2.59678600 | 1.90532900  |
| C | -1.22642000 | 5.58733000  | 0.46953300  | H | 2.93423600  | -1.19994200 | 1.11060800  |
| C | -2.30528500 | 0.52839200  | -4.02034100 | H | 5.09146500  | -0.39655800 | -2.52436000 |
| H | 0.70275300  | -0.50526700 | 2.57901700  | H | 6.94976600  | -1.79861600 | -1.74445600 |
| H | -4.80471500 | -3.65697100 | 4.89218300  | C | 2.82354600  | 0.17442600  | -1.26106400 |
| H | 1.29681600  | -1.67036000 | -2.78387300 | C | 2.46454400  | 0.98957500  | -2.18616000 |
| H | -3.81430200 | 2.76589200  | 1.06539600  | H | 2.51440400  | 1.24626200  | -3.23457400 |
| H | 0.08709900  | 4.03445400  | -0.21805100 | H | 2.48153500  | 0.79487600  | 1.41285100  |
| H | -0.50675500 | -3.07648600 | -2.55730200 | O | 6.96395500  | -3.09045700 | 0.66814000  |
| H | -7.12287300 | -0.68133500 | -1.17100800 | C | 8.13634700  | -3.33107600 | -0.10895200 |
| H | 3.30248800  | -5.49152800 | -0.35050700 | H | 8.67854000  | -2.39963200 | -0.31126700 |
| H | -5.08364200 | -0.47289600 | 0.18169900  | H | 8.76164100  | -3.99157600 | 0.49411700  |

**TS1- Nap**

|    |           |            |            |   |           |            |            |
|----|-----------|------------|------------|---|-----------|------------|------------|
| C  | -1.967869 | -3.4087190 | 0.76166500 | C | -0.220880 | -2.7699980 | -5.5404050 |
| C  | -2.327832 | -4.8822500 | 0.44215700 | C | -0.220930 | 1.29822900 | -2.1254440 |
| C  | -1.471386 | -5.4390610 | -0.6624720 | C | -0.763238 | -2.2940890 | -3.2326670 |
| C  | -0.347101 | -4.8602600 | -1.1059550 | C | 2.2695760 | -0.0634330 | -1.4761030 |
| C  | 0.2216570 | -3.6298810 | -0.5232970 | C | 1.8970990 | 1.93916400 | 0.01780000 |
| C  | -0.520518 | -2.9541030 | 0.60204500 | C | 0.2739950 | 2.38359800 | 1.78634100 |
| H  | -2.294772 | -3.1897930 | 1.78637800 | C | 2.2996110 | 5.10050200 | -1.9698890 |
| H  | -1.828382 | -6.3652480 | -1.1091640 | C | 1.7457500 | 3.29001000 | -0.4383870 |
| H  | 0.2365990 | -5.2966780 | -1.9121360 | C | 1.2678610 | 0.77318200 | 5.74152200 |
| C  | -2.321767 | -5.8000200 | 1.65670200 | C | 2.4485860 | 3.79191900 | -1.5677270 |
| H  | -3.018686 | -5.4184950 | 2.41025000 | C | -0.310897 | 3.19754100 | -3.6339430 |
| H  | -2.624303 | -6.8152450 | 1.37947200 | C | 0.6035510 | -1.5396920 | 5.53413000 |
| H  | -1.317342 | -5.8436240 | 2.09057200 | C | 0.1055220 | 3.67375900 | 1.34895600 |
| O  | -3.688203 | -4.7970200 | -0.0409950 | C | 6.1594810 | 2.30890200 | 0.29290100 |
| C  | -3.793145 | -3.6129010 | -0.8408990 | C | 6.4854180 | 0.32705200 | -1.0507680 |
| H  | -3.542437 | -3.8253000 | -1.8924890 | C | 3.9857040 | -0.0770930 | 2.35349500 |
| O  | 1.3133600 | -3.2341170 | -0.9343740 | C | 4.6460270 | -2.5232230 | 1.18436100 |
| C  | -2.817646 | -2.6461390 | -0.2185960 | C | 5.2894890 | -0.5560450 | 2.43210200 |
| C  | -2.553876 | -1.3546610 | -0.5071490 | C | 3.1549100 | -1.0160260 | -2.0502910 |
| H  | -4.831959 | -3.2680810 | -0.8042570 | C | 4.5147930 | -0.8878770 | -1.9249240 |
| C  | -3.271567 | -0.5983110 | -1.5853740 | C | 4.2091510 | 1.15027100 | -0.5968480 |
| H  | -4.231072 | -1.0684690 | -1.8351020 | C | -1.309210 | 3.78487600 | -2.8522670 |
| H  | -3.469691 | 0.43929000 | -1.3115490 | C | 0.7953380 | -1.8129370 | -5.4897590 |
| H  | -2.663849 | -0.5733270 | -2.4971360 | C | 0.2292400 | 1.96393900 | -3.2748210 |
| Rh | -0.670033 | -0.8759610 | 0.44192900 | C | 0.7096710 | 5.51101600 | -0.1954400 |
| P  | 0.4497280 | -0.3489560 | -1.6244250 | C | 2.7890690 | 0.99434000 | -0.7261090 |
| P  | 1.2595400 | -0.2414930 | 1.71166700 | C | 0.8899280 | -0.4319250 | 6.33580300 |
| C  | 3.0025250 | -0.8165600 | 1.67413300 | C | 1.3533700 | 0.87763100 | 4.35182500 |
| C  | 3.3367580 | -2.0417290 | 1.09243900 | C | -1.216150 | 1.90139500 | -1.3458290 |
| C  | 0.8522210 | 4.17160400 | 0.25062200 | C | 1.4240840 | 5.97111500 | -1.2787890 |
| C  | 1.2112380 | 1.51260700 | 1.15629900 | C | 4.7926310 | 2.20227300 | 0.16244900 |
| C  | 7.0174000 | 1.36370700 | -0.3179340 | C | -0.998818 | -3.0093380 | -4.4072980 |
| C  | 5.0809120 | 0.19538100 | -1.2092590 | C | -1.761892 | 3.13230500 | -1.7057260 |
| C  | 5.6227120 | -1.7838010 | 1.84950000 | H | 2.5876920 | -2.5939490 | 0.53925300 |
| C  | 0.2514290 | -1.3301330 | -3.1699690 | H | 8.0931780 | 1.45602000 | -0.2003970 |
| C  | 0.6826590 | -1.4364680 | 4.14570200 | H | 0.4600820 | -2.3043350 | 3.53111200 |
| C  | 1.0308810 | -1.0979870 | -4.3157630 | H | 1.8379620 | -0.3751420 | -4.2966030 |
| C  | 1.0484390 | -0.2233810 | 3.53931400 | H | -1.369372 | -2.4923020 | -2.3596080 |
|    |           |            |            | H | -0.311409 | 2.02266800 | 2.62442400 |
|    |           |            |            | H | 2.8497040 | 5.46497900 | -2.8325090 |
|    |           |            |            | H | 1.5037830 | 1.63589200 | 6.35797600 |

|   |           |            |            |    |             |             |             |
|---|-----------|------------|------------|----|-------------|-------------|-------------|
| H | 3.1096400 | 3.13093100 | -2.1150890 | C  | -5.239622   | -0.2540100  | 0.93707000  |
| H | 0.0558150 | 3.70548600 | -4.5212000 | C  | -3.972454   | 0.34420400  | 1.19790200  |
| H | 0.3176710 | -2.4840340 | 5.98822600 | H  | -7.297475   | 0.08125200  | 0.47028200  |
| H | -0.601784 | 4.33250500 | 1.84571200 | H  | -5.321282   | -1.3355800  | 0.95261200  |
| H | 6.5832590 | 3.12071200 | 0.87697800 |    |             |             |             |
| H | 7.1305830 | -0.4128430 | -1.5168450 |    |             |             |             |
| H | 3.7365770 | 0.87544800 | 2.80901300 |    |             |             |             |
| H | 4.8998680 | -3.4722850 | 0.72038000 |    |             |             |             |
| H | 6.0480640 | 0.03061300 | 2.94160800 | C  | 1.79524100  | 3.63485900  | 0.23690700  |
| H | 2.7488050 | -1.8724500 | -2.5699380 | C  | 1.87450900  | 4.93541900  | 1.08104700  |
| H | 5.1757390 | -1.6314600 | -2.3617680 | C  | 0.67487800  | 5.06959800  | 1.98232100  |
| H | 1.4105130 | -1.6219460 | -6.3643350 | C  | -0.07922300 | 4.03067700  | 2.36335600  |
| H | 1.0106580 | 1.53144200 | -3.8879200 | C  | 0.28615500  | 2.63962800  | 2.02857700  |
| H | 0.0237630 | 6.16503000 | 0.33632500 | C  | 1.21801700  | 2.38087900  | 0.88496500  |
| H | 1.6654000 | 1.81678600 | 3.90938300 | H  | 2.80153300  | 3.41167900  | -0.14245600 |
| H | -1.564873 | 1.41585100 | -0.4429130 | H  | 0.45684600  | 6.07705800  | 2.33145400  |
| H | 1.3121670 | 6.99890800 | -1.6115180 | H  | -0.91033100 | 4.14893200  | 3.05260800  |
| H | 4.1502130 | 2.92562700 | 0.64958300 | C  | 3.17463700  | 5.10046900  | 1.85416400  |
| H | -1.786883 | -3.7565500 | -4.4307570 | H  | 4.02164300  | 5.07847200  | 1.16051000  |
| H | -2.534898 | 3.57942300 | -1.0880580 | H  | 3.18627100  | 6.05238600  | 2.39512900  |
| H | 6.6412440 | -2.1559150 | 1.91360500 | H  | 3.28691800  | 4.28802200  | 2.57915800  |
| H | 0.8242950 | -0.5098790 | 7.41706300 | O  | 1.81875800  | 5.97618400  | 0.08105300  |
| H | -1.725332 | 4.74785600 | -3.1333810 | C  | 0.86498500  | 5.57395500  | -0.90854500 |
| H | -0.400709 | -3.3269390 | -6.4554800 | H  | -0.14260600 | 5.94310300  | -0.65887600 |
| C | -2.805407 | -0.4518150 | 1.46530300 | O  | -0.08472000 | 1.73128600  | 2.77368900  |
| C | -1.804817 | -0.7871250 | 2.17676900 | C  | 0.92638700  | 4.07003700  | -0.90292900 |
| H | -1.533929 | -0.8251880 | 3.22022200 | C  | 0.30500900  | 3.14883700  | -1.67353200 |
| H | 0.0619640 | -3.1077680 | 1.51520600 | H  | 1.15719400  | 6.01527900  | -1.86795300 |
| C | -5.907546 | 4.75526400 | 0.50010000 | C  | -0.64883400 | 3.48368000  | -2.78377400 |
| C | -4.818102 | 3.97223600 | 0.81065500 | H  | -0.49962300 | 4.51079600  | -3.14140300 |
| C | -4.942172 | 2.55757700 | 0.87197500 | H  | -0.53563200 | 2.80758900  | -3.63800400 |
| C | -6.215320 | 1.95242600 | 0.61073000 | H  | -1.68653500 | 3.39407000  | -2.44394200 |
| C | -7.317692 | 2.78840600 | 0.29863500 | Rh | 0.36380600  | 1.24842000  | -0.70799000 |
| C | -7.166640 | 4.15782100 | 0.24312300 | P  | -1.98975700 | 1.18473300  | -0.10505100 |
| H | -2.867259 | 2.17707700 | 1.35547500 | P  | 0.49022000  | -1.25671100 | -0.26060300 |
| H | -5.806868 | 5.83542500 | 0.45149800 | C  | 0.70722400  | -2.06538800 | 1.35769800  |
| H | -3.848568 | 4.42073200 | 1.01111400 | C  | 0.81693000  | -1.27406100 | 2.50637200  |
| C | -3.836445 | 1.72520400 | 1.16708700 | C  | -3.29936600 | -3.17056300 | -2.27483600 |
| C | -6.328716 | 0.53364900 | 0.66344100 | C  | -0.99814000 | -2.11589400 | -0.98013800 |
| H | -8.282835 | 2.32977100 | 0.10120300 | C  | -2.96154200 | -4.07299200 | 4.27800900  |
| H | -8.017399 | 4.78774100 | 0.00015700 | C  | -2.74924500 | -1.81272900 | 3.40992000  |
|   |           |            |            | C  | 0.92885900  | -3.27143100 | 3.86884100  |

**TS2- Nap**

|   |             |             |             |   |             |             |             |
|---|-------------|-------------|-------------|---|-------------|-------------|-------------|
| C | -2.94978300 | 2.65894800  | 0.42426800  | H | -1.43663700 | 4.04822100  | -0.20154700 |
| C | 1.85796000  | -1.47425400 | -2.68141600 | H | 0.06973000  | -2.99278500 | -2.65857700 |
| C | -4.23106400 | 2.53320900  | 0.99151100  | H | -6.81674800 | -2.65782900 | -0.68345000 |
| C | 1.83841800  | -1.88776600 | -1.33683600 | H | 4.74660200  | -3.65812600 | -1.31378500 |
| C | -4.44070800 | 4.94174300  | 1.10157700  | H | -4.82368000 | -1.84364200 | 0.49921000  |
| C | -2.85229500 | 0.67104000  | -1.65026400 | H | -5.92831700 | 0.29231200  | -3.06428400 |
| C | -2.42814200 | 3.93952500  | 0.21111700  | H | 2.89437600  | -1.53006500 | -4.56317200 |
| C | -2.38151000 | -0.04047100 | 1.22036300  | H | -1.90433300 | -3.89050000 | -3.76276200 |
| C | -2.24395100 | -1.99920300 | -0.36928300 | H | -2.82104600 | -5.65886500 | 2.80499200  |
| C | -0.89713000 | -2.83542200 | -2.20320000 | H | -3.04738800 | -2.30528400 | 5.49260700  |
| C | -5.83267400 | -2.80053000 | -1.12043100 | H | 0.58831200  | -4.08117500 | 0.58212800  |
| C | -3.41784700 | -2.50950100 | -1.01253400 | H | 0.98844200  | -1.26191800 | 4.65041300  |
| C | 3.93237400  | -3.05505500 | -1.70451200 | H | 0.80596000  | -5.14588100 | 2.80490500  |
| C | -4.71603400 | -2.34700700 | -0.45444000 | H | -2.51956000 | 1.50990800  | 2.73644700  |
| C | -4.84552200 | 0.29788600  | -2.98278200 | H | -2.83999000 | -0.01542200 | 4.61108600  |
| C | 2.89547400  | -1.85621500 | -3.52710700 | H | -5.95673000 | 3.55359000  | 1.76325700  |
| C | -2.00815900 | -3.34762100 | -2.82710400 | H | -4.87530100 | 0.96632400  | -0.94693200 |
| C | -2.80431000 | -4.58518400 | 2.96838700  | H | -4.35981300 | -4.12415200 | -3.89856200 |
| C | -2.93174700 | -2.71344600 | 4.49206600  | H | 2.90016500  | -2.99945400 | 0.17720700  |
| C | 0.69985300  | -3.46500400 | 1.46904500  | H | -0.98611300 | 0.25519600  | -2.66768500 |
| C | 0.92477600  | -1.88030300 | 3.75957600  | H | -6.60141200 | -3.79541700 | -2.88951900 |
| C | 0.81851100  | -4.06316200 | 2.72136500  | H | -2.48403600 | -4.14484800 | 0.90715200  |
| C | -2.54408300 | 0.44684200  | 2.54953500  | H | -2.74275700 | 6.06074000  | 0.38239100  |
| C | -2.72107300 | -0.40966400 | 3.60551400  | H | -2.04575000 | -0.38424200 | -4.79270700 |
| C | -2.58804100 | -2.32498100 | 2.08457700  | H | 1.00469200  | -3.74119000 | 4.84524700  |
| C | -4.05829000 | -0.08173200 | -4.07141500 | H | 4.76475000  | -2.92291500 | -3.68814800 |
| C | -4.96950500 | 3.66667900  | 1.32476300  | H | -4.52667300 | -0.38004200 | -5.00474400 |
| C | -4.24767100 | 0.67614200  | -1.78066200 | H | -5.01694900 | 5.82373900  | 1.36591500  |
| C | -4.46819800 | -3.62929300 | -2.93716800 | C | 2.35723700  | 1.25760700  | -1.43697100 |
| C | -2.39502200 | -1.41127200 | 0.99265600  | C | 1.74153800  | 1.96306400  | -2.31352900 |
| C | 3.94311600  | -2.64096000 | -3.03622500 | H | 1.67286400  | 2.24686200  | -3.35408400 |
| C | 2.88375300  | -2.68494200 | -0.85940100 | H | 1.99263700  | 1.70485500  | 1.24211900  |
| C | -2.06990100 | 0.29193600  | -2.75214900 | C | 4.71948800  | 0.78783000  | -1.86941500 |
| C | -5.71111600 | -3.44607500 | -2.37471600 | C | 5.98920600  | 0.29302100  | -1.48901700 |
| C | -2.61796200 | -3.73524900 | 1.90081100  | C | 3.62282100  | 0.69937900  | -1.01986700 |
| C | -3.16845900 | 5.07504700  | 0.54696900  | C | 7.11286900  | 0.36247800  | -2.35813600 |
| C | -2.66647400 | -0.08120200 | -3.95463400 | C | 6.14761000  | -0.30446400 | -0.19512500 |
| H | 0.75906400  | -0.19382600 | 2.43106300  | C | 3.79322600  | 0.09487900  | 0.26098400  |
| H | -3.10258600 | -4.75565900 | 5.11102300  | C | 8.33458600  | -0.13688600 | -1.96608400 |
| H | 1.05825700  | -0.84962300 | -3.06616200 | H | 6.98715800  | 0.81494100  | -3.33837300 |
| H | -4.64739600 | 1.55149600  | 1.19004200  | C | 7.42093300  | -0.80692900 | 0.17938600  |



|   |            |             |             |   |             |             |             |
|---|------------|-------------|-------------|---|-------------|-------------|-------------|
| C | 5.01630800 | -0.38182700 | 0.66029400  | C | -1.50080900 | 1.06336000  | -1.36406700 |
| H | 2.93834500 | -0.00785800 | 0.91769000  | C | -6.97744500 | -0.60918700 | 0.45150200  |
| C | 8.49035500 | -0.72682700 | -0.68612400 | C | -4.77210100 | -0.92816600 | 1.42340300  |
| H | 9.18659500 | -0.08157900 | -2.63762000 | C | -4.65636800 | -3.48517300 | -1.22098100 |
| H | 7.53597100 | -1.25909200 | 1.16110500  | C | 0.29322700  | -0.50394200 | 3.32267600  |
| H | 5.12793500 | -0.84441500 | 1.63730300  | C | -0.05716600 | -2.02405700 | -3.86159400 |
| H | 9.46010700 | -1.11689200 | -0.39057400 | C | -0.50318700 | -0.26545900 | 4.45528100  |
| H | 4.60454700 | 1.24252400  | -2.84934400 | C | -0.80195200 | -0.91327200 | -3.43257100 |

### TS1-Me

|    |             |             |             |   |             |             |             |
|----|-------------|-------------|-------------|---|-------------|-------------|-------------|
| C  | 3.01970600  | -2.56424300 | -0.34665100 | C | -2.01983700 | -0.25843400 | 1.55525900  |
| C  | 3.80298400  | -3.79514900 | 0.17921500  | C | -2.29644100 | 1.44903700  | -0.28513900 |
| C  | 3.16879800  | -4.37286100 | 1.41508600  | C | -0.88073400 | 2.05458700  | -2.17961500 |
| C  | 1.93692300  | -4.06425000 | 1.84244300  | C | -3.70342800 | 4.62931800  | 1.13625600  |
| C  | 1.02243100  | -3.16484700 | 1.11359500  | C | -2.58468600 | 2.83862800  | -0.07773700 |
| C  | 1.50559600  | -2.52549100 | -0.16441800 | C | -1.36581000 | -0.44078600 | -5.74560400 |
| H  | 3.25238900  | -2.43770600 | -1.41174400 | C | -3.43065700 | 3.28962100  | 0.97219500  |
| H  | 3.78908800  | -5.06902700 | 1.97673200  | C | -0.61808300 | 3.99679800  | 2.83332200  |
| H  | 1.52451500  | -4.49844700 | 2.74941300  | C | 0.03632000  | -2.33518800 | -5.21781800 |
| C  | 4.04783300  | -4.87241900 | -0.86761500 | C | -1.12489300 | 3.38953900  | -1.97549400 |
| H  | 4.58780700  | -4.44375000 | -1.71841500 | C | -6.45768600 | 0.41148900  | -0.37955500 |
| H  | 4.64191500  | -5.69234500 | -0.45070700 | C | -6.14778400 | -1.26615600 | 1.33168300  |
| H  | 3.09413300  | -5.27894900 | -1.21991400 | C | -3.62286800 | -1.49809900 | -2.13183000 |
| O  | 5.08541500  | -3.24044100 | 0.55227200  | C | -3.50119800 | -3.74775800 | -0.48613600 |
| C  | 4.84666100  | -1.96087000 | 1.15162600  | C | -4.71543000 | -2.35510300 | -2.04360200 |
| H  | 4.68611600  | -2.05943100 | 2.23698500  | C | -2.56332100 | -1.30254700 | 2.35254300  |
| O  | -0.12314300 | -3.01867200 | 1.54215500  | C | -3.89590600 | -1.62169100 | 2.29373900  |
| C  | 3.61970000  | -1.43540200 | 0.44931300  | C | -4.24260000 | 0.10714300  | 0.58981100  |
| C  | 2.98799900  | -0.24823200 | 0.55314800  | C | 0.21926100  | 4.67542800  | 1.94406800  |
| H  | 5.73629300  | -1.34135800 | 0.99610300  | C | -0.05668900 | -0.63029100 | 5.72499500  |
| C  | 3.46500800  | 0.85009100  | 1.45791100  | C | -0.75996700 | 2.61279200  | 2.74993100  |
| H  | 4.50716300  | 0.69533100  | 1.76497900  | C | -2.28619600 | 5.19210200  | -0.73941000 |
| H  | 3.39915300  | 1.83658900  | 0.99452500  | C | -2.84545900 | 0.42501800  | 0.65922700  |
| H  | 2.85109500  | 0.88679900  | 2.36482800  | C | -0.61424000 | -1.54013700 | -6.16434700 |
| Rh | 1.04157000  | -0.50038900 | -0.36429700 | C | -1.46548200 | -0.13057000 | -4.38800000 |
| P  | -0.19986200 | 0.04696500  | 1.63541200  | C | 0.77185500  | 2.57638800  | 0.88820200  |
| P  | -0.98744900 | -0.68482300 | -1.61611800 | C | -3.12721600 | 5.59224400  | 0.27459700  |
| C  | -2.46192800 | -1.75500000 | -1.38295100 | C | -5.12599600 | 0.75682800  | -0.31639700 |
| C  | -2.40460800 | -2.88431200 | -0.56244800 | C | 1.98660600  | -1.48442100 | 4.76613000  |
| C  | -1.99947300 | 3.81726400  | -0.94389000 | C | 0.91659300  | 3.96018200  | 0.97036000  |

|   |             |             |             |               |             |             |             |
|---|-------------|-------------|-------------|---------------|-------------|-------------|-------------|
| H | -1.52514500 | -3.06455100 | 0.04241300  | H             | 3.93086400  | 4.86570400  | -1.79565100 |
| H | -8.02842700 | -0.87544400 | 0.38667200  | C             | 2.97991700  | 0.37817100  | -1.56422700 |
| H | 0.45309400  | -2.64790700 | -3.13348100 | C             | 2.09328400  | -0.33066500 | -2.14008300 |
| H | -1.48415900 | 0.18366400  | 4.35395700  | H             | 1.83206700  | -0.60037000 | -3.15183100 |
| H | 2.16207500  | -1.32069000 | 2.63469300  | H             | 0.97546400  | -3.00925700 | -0.99014900 |
| H | -0.20766900 | 1.74861400  | -2.97271000 | C             | 6.62351000  | 4.82939500  | -1.31180600 |
| H | -4.35717400 | 4.95147200  | 1.94150000  | H             | 6.09241200  | 5.78508100  | -1.34772400 |
| H | -1.88240700 | 0.17674900  | -6.47477300 | H             | 7.22522000  | 4.80202200  | -0.39585100 |
| H | -3.86455900 | 2.56457000  | 1.64994300  | H             | 7.32411800  | 4.79977400  | -2.15634500 |
| H | -1.17467500 | 4.54799700  | 3.58552800  |               |             |             |             |
| H | 0.61741500  | -3.19696400 | -5.53316300 | <b>TS2-Me</b> |             |             |             |
| H | -0.65352600 | 4.13578000  | -2.60930700 | C             | 3.48908200  | 1.96883700  | 0.45867300  |
| H | -7.11367000 | 0.92043200  | -1.07987800 | C             | 4.19614100  | 3.04623200  | 1.32384200  |
| H | -6.52933500 | -2.05979900 | 1.96843100  | C             | 3.21016300  | 3.77520800  | 2.19666000  |
| H | -3.67730500 | -0.62496400 | -2.77358500 | C             | 2.00273400  | 3.28814800  | 2.50869400  |
| H | -3.45192700 | -4.61772000 | 0.16287800  | C             | 1.58088100  | 1.92318000  | 2.13554600  |
| H | -5.61603100 | -2.13797100 | -2.61017700 | C             | 2.32820900  | 1.18713200  | 1.06157400  |
| H | -1.90941700 | -1.87242300 | 2.99773000  | H             | 4.25313200  | 1.26393000  | 0.10686900  |
| H | -4.29187800 | -2.42781400 | 2.90529400  | H             | 3.53865300  | 4.74057000  | 2.57699200  |
| H | -0.68747900 | -0.44077300 | 6.58873300  | H             | 1.32324900  | 3.82127200  | 3.16747100  |
| H | -1.43329200 | 2.11095300  | 3.43444300  | C             | 5.37773100  | 2.52424200  | 2.12796500  |
| H | -1.82911400 | 5.92148500  | -1.40272400 | H             | 6.11274000  | 2.07315300  | 1.45320400  |
| H | -2.06658900 | 0.71793600  | -4.08084600 | H             | 5.85935400  | 3.33649100  | 2.68228000  |
| H | 1.31012500  | 2.03169200  | 0.12243600  | H             | 5.04025100  | 1.76755700  | 2.84333900  |
| H | -3.34546400 | 6.64616800  | 0.42037900  | O             | 4.70420500  | 3.97165000  | 0.33743500  |
| H | -4.74164000 | 1.52866500  | -0.97194200 | C             | 3.70161600  | 4.11410800  | -0.67541900 |
| H | 2.95445900  | -1.96510300 | 4.87630100  | H             | 3.00734500  | 4.93413200  | -0.43161500 |
| H | 1.56844900  | 4.47387300  | 0.26977700  | O             | 0.69957400  | 1.37842500  | 2.80156300  |
| H | -5.51047800 | -4.15306700 | -1.15432400 | C             | 3.00238500  | 2.78113400  | -0.70233000 |
| H | -0.53934300 | -1.77890600 | -7.22122900 | C             | 2.04340200  | 2.29577100  | -1.52168500 |
| H | 0.32117000  | 5.75481000  | 2.00778200  | H             | 4.19954300  | 4.36209000  | -1.61906800 |
| H | 1.53509500  | -1.52381800 | 6.87525500  | C             | 1.45248900  | 3.06873200  | -2.66504800 |
| C | 6.13378500  | 2.35465300  | -1.16218900 | H             | 1.31460100  | 2.44127000  | -3.55183400 |
| C | 5.26806800  | 1.27174800  | -1.21009800 | H             | 0.46659000  | 3.46597100  | -2.40093600 |
| C | 3.90324800  | 1.47233400  | -1.48756000 | H             | 2.09234600  | 3.91537300  | -2.94538200 |
| C | 3.42859700  | 2.78034100  | -1.69571500 | Rh            | 1.13492400  | 0.57967400  | -0.59760300 |
| C | 4.30669900  | 3.85897100  | -1.63543100 | P             | -0.99272100 | 1.66317300  | -0.11965700 |
| C | 5.66931200  | 3.66629900  | -1.36885200 | P             | 0.06945200  | -1.63695600 | -0.14869600 |
| H | 7.18765000  | 2.19059600  | -0.95357800 | C             | -0.32856900 | -2.33135600 | 1.48911700  |
| H | 5.63028500  | 0.26517400  | -1.02839000 | C             | 0.12961800  | -1.67940900 | 2.63891900  |
| H | 2.37403300  | 2.93871600  | -1.89781000 |               |             |             |             |

|   |             |             |             |   |             |             |             |
|---|-------------|-------------|-------------|---|-------------|-------------|-------------|
| C | -3.92463800 | -1.51458700 | -2.63280900 | C | -1.94401300 | 1.17372100  | -4.08739300 |
| C | -1.55244000 | -1.65755500 | -1.06803000 | H | 0.66149800  | -0.73976200 | 2.55414500  |
| C | -4.77309100 | -2.50183900 | 3.90343700  | H | -5.29933600 | -3.03803700 | 4.68788800  |
| C | -3.40721200 | -0.62784100 | 3.17443300  | H | 1.20440300  | -1.84459900 | -2.83511800 |
| C | -0.92121600 | -3.36859500 | 4.01700600  | H | -3.19629200 | 3.28130400  | 1.06912400  |
| C | -1.13013100 | 3.41426500  | 0.42960300  | H | 0.89982600  | 3.89369500  | -0.08628700 |
| C | 1.45737500  | -2.76172800 | -2.31564500 | H | -0.80130400 | -2.83889700 | -2.73089700 |
| C | -2.34053700 | 3.93139300  | 0.92602900  | H | -7.04114900 | 0.37373600  | -1.26061100 |
| C | 1.01867000  | -2.96886900 | -0.99603000 | H | 2.46475700  | -6.00790100 | -0.46570700 |
| C | -1.35280300 | 6.13363200  | 1.10672100  | H | -5.01975300 | 0.21590300  | 0.12015800  |
| C | -1.91606800 | 1.68897000  | -1.71278600 | H | -4.84538300 | 2.67773800  | -3.14198900 |
| C | -0.03955600 | 4.27830100  | 0.28070200  | H | 2.56297900  | -3.53716800 | -3.98634900 |
| C | -2.03542700 | 0.76761100  | 1.11553800  | H | -2.82246400 | -2.69115500 | -4.07400400 |
| C | -2.67537500 | -1.00634700 | -0.55796700 | H | -5.31393000 | -3.92304000 | 2.35705100  |
| C | -1.64024000 | -2.27975700 | -2.34416000 | H | -4.07635900 | -0.94323000 | 5.20436300  |
| C | -6.16952300 | -0.15345200 | -1.63748600 | H | -1.46488000 | -4.00262600 | 0.71947100  |
| C | -3.87939200 | -0.92451200 | -1.33132300 | H | 0.16897800  | -1.67489300 | 4.78939100  |
| C | 2.17781400  | -5.10301300 | -0.99350400 | H | -1.97421000 | -4.92602100 | 2.95610300  |
| C | -5.03718900 | -0.24508000 | -0.85987500 | H | -1.53770000 | 2.16902700  | 2.69765000  |
| C | -3.84661400 | 2.25866700  | -3.06611800 | H | -2.71240000 | 0.96478000  | 4.46324000  |
| C | 2.23473200  | -3.71653000 | -2.96662100 | H | -3.38946400 | 5.66145500  | 1.64680600  |
| C | -2.78342800 | -2.20791100 | -3.10146600 | H | -3.69954400 | 2.65524900  | -0.96481600 |
| C | -4.78205100 | -3.00264100 | 2.58023900  | H | -5.11622900 | -1.84613400 | -4.40505500 |
| C | -4.09483100 | -1.33932300 | 4.19258000  | H | 1.09232500  | -4.32610400 | 0.68257400  |
| C | -1.09044400 | -3.50471700 | 1.60849800  | H | -0.29277200 | 0.74316300  | -2.78124400 |
| C | -0.17116100 | -2.19785600 | 3.90005500  | H | -7.10404900 | -0.64630300 | -3.53334400 |
| C | -1.37747100 | -4.02318000 | 2.86869100  | H | -4.10997900 | -2.75160800 | 0.57368300  |
| C | -2.06086000 | 1.25723800  | 2.45287900  | H | 0.71243400  | 6.28123400  | 0.50220200  |
| C | -2.71621900 | 0.57843200  | 3.44768600  | H | -1.45276000 | 0.75331500  | -4.96018000 |
| C | -3.40412600 | -1.13470100 | 1.83740600  | H | -1.16036700 | -3.76750600 | 4.99857600  |
| C | -3.22492300 | 1.71916900  | -4.19444200 | H | 3.21945800  | -5.62999000 | -2.80670400 |
| C | -2.44871900 | 5.27927800  | 1.26131900  | H | -3.73726400 | 1.72351800  | -5.15200300 |
| C | -3.19738800 | 2.24464700  | -1.83265700 | H | -1.43915200 | 7.18353400  | 1.37145400  |
| C | -5.10338000 | -1.39732500 | -3.41551600 | C | 4.55143600  | -2.96720600 | 0.94362500  |
| C | -2.68528200 | -0.42486200 | 0.81555500  | C | 3.63783200  | -2.01954500 | 0.49025300  |
| C | 2.60231500  | -4.89053900 | -2.30472800 | C | 3.83168000  | -1.36872700 | -0.73859200 |
| C | 1.39146500  | -4.15011700 | -0.34313000 | C | 4.97961100  | -1.69527000 | -1.49267700 |
| C | -1.29387600 | 1.16222300  | -2.85407200 | C | 5.88446600  | -2.64141900 | -1.03117700 |
| C | -6.20529200 | -0.73116300 | -2.92950500 | C | 5.68612900  | -3.29999200 | 0.19412800  |
| C | -4.10906000 | -2.34239600 | 1.57624100  | H | 2.76150400  | -1.79375100 | 1.08685400  |
| C | -0.14879500 | 5.62938900  | 0.61735800  | H | 5.15030300  | -1.19230200 | -2.44010900 |

|   |            |             |             |   |             |             |             |
|---|------------|-------------|-------------|---|-------------|-------------|-------------|
| H | 6.76158000 | -2.87812400 | -1.62851600 | C | -3.59394300 | 1.92843600  | 0.93291100  |
| C | 2.94265500 | -0.34379100 | -1.22841800 | C | -0.81733600 | -4.20174400 | 0.60349200  |
| C | 2.74191500 | 0.54257800  | -2.13369300 | C | -1.30904200 | -1.50216700 | 1.29454000  |
| H | 2.84731600 | 0.81874400  | -3.17313800 | C | -7.12560400 | -1.75618100 | -0.11806500 |
| H | 2.63798300 | 0.22501800  | 1.46917000  | C | -5.25648000 | -0.58093700 | -1.13552300 |
| H | 4.37589400 | -3.46251300 | 1.89505800  | C | -5.86132500 | 1.64661200  | 1.73512100  |
| C | 6.65519800 | -4.35147100 | 0.66814300  | C | -0.53211100 | 1.02327600  | -3.26973600 |
| H | 6.50074900 | -5.29581600 | 0.12868300  | C | -0.86700800 | 1.68661100  | 4.02552200  |
| H | 7.69350400 | -4.04769200 | 0.49306100  | C | -1.29375200 | 0.63350500  | -4.38414900 |
| H | 6.53111100 | -4.55719400 | 1.73597600  | C | -1.21192200 | 0.42294600  | 3.51963400  |

### TS1-Br

|    |             |             |             |   |             |             |             |
|----|-------------|-------------|-------------|---|-------------|-------------|-------------|
| C  | 1.58989200  | 3.51642100  | 0.53175800  | C | 0.08711000  | -1.48073300 | -2.00314300 |
| C  | 1.86659800  | 4.99229900  | 0.14407200  | C | 0.40384100  | 2.05421900  | -3.42246800 |
| C  | 0.98484600  | 5.44723700  | -0.98713200 | C | -2.46293300 | -0.20365200 | -1.45088300 |
| C  | -0.09626200 | 4.78009300  | -1.41339800 | C | -1.98215000 | -2.05440400 | 0.20386100  |
| C  | -0.59144100 | 3.54200300  | -0.78319400 | C | -0.32011500 | -2.26637000 | 1.98064700  |
| C  | 0.17139100  | 2.97591800  | 0.38947200  | C | -2.26091900 | -5.39580000 | -1.48958900 |
| H  | 1.92594600  | 3.36335500  | 1.56523500  | C | -1.77024800 | -3.43091800 | -0.13711800 |
| H  | 1.28786400  | 6.37328100  | -1.47237900 | C | -1.39210700 | -0.40282600 | 5.79421100  |
| H  | -0.69747300 | 5.14268000  | -2.24303700 | C | -2.47064800 | -4.06629800 | -1.19876000 |
| C  | 1.80476900  | 5.96504600  | 1.31294700  | C | 0.19481800  | -3.53272200 | -3.29682700 |
| H  | 2.51666600  | 5.65846200  | 2.08635900  | C | -0.78042200 | 1.90076800  | 5.40076600  |
| H  | 2.05396600  | 6.98057800  | 0.98787200  | C | -0.08372600 | -3.57587200 | 1.64397700  |
| H  | 0.79703000  | 5.97546100  | 1.74120800  | C | -6.21686100 | -2.59529500 | 0.56938200  |
| O  | 3.23047200  | 4.96103300  | -0.33522400 | C | -6.65153600 | -0.76785900 | -0.95061100 |
| C  | 3.39990500  | 3.75226400  | -1.08602500 | C | -4.14732700 | 0.07018300  | 2.38585200  |
| H  | 3.13660400  | 3.90726300  | -2.14428800 | C | -4.92240500 | 2.35955400  | 0.99127200  |
| O  | -1.64305200 | 3.05138100  | -1.19608400 | C | -5.47073200 | 0.49703900  | 2.43053400  |
| C  | 2.47901100  | 2.75979800  | -0.41994100 | C | -3.39983500 | 0.64682300  | -2.09892400 |
| C  | 2.27962000  | 1.44941500  | -0.65977700 | C | -4.75069500 | 0.45990700  | -1.95193000 |
| H  | 4.45648900  | 3.46829500  | -1.03861200 | C | -4.33330000 | -1.43054100 | -0.44782200 |
| C  | 3.03604000  | 0.68559000  | -1.70666600 | C | 1.27370900  | -3.97494500 | -2.52725700 |
| H  | 3.92690600  | 1.23478000  | -2.03685700 | C | -1.11649600 | 1.25974800  | -5.61730500 |
| H  | 3.36219300  | -0.29734900 | -1.36108800 | C | -0.39512400 | -2.29732500 | -3.03656100 |
| H  | 2.40409700  | 0.51561000  | -2.58533000 | C | -0.60952800 | -5.56476100 | 0.26796700  |
| Rh | 0.44237300  | 0.90761100  | 0.35871000  | C | -2.92343300 | -1.21793700 | -0.60662200 |
| P  | -0.66259600 | 0.16942400  | -1.64396900 | C | -1.03781500 | 0.85359500  | 6.28890000  |
| P  | -1.43712200 | 0.28675700  | 1.69943800  | C | -1.48513200 | -0.61828300 | 4.41787700  |
| C  | -3.20221900 | 0.78228400  | 1.62826700  | C | 1.16589600  | -1.93748300 | -1.23435300 |
|    |             |             |             | C | -1.32167100 | -6.15463700 | -0.75214200 |
|    |             |             |             | C | -4.85812800 | -2.43389800 | 0.41345900  |

|   |             |             |             |
|---|-------------|-------------|-------------|
| C | 0.58215200  | 2.67996800  | -4.65671300 |
| C | 1.75821800  | -3.17249300 | -1.49450300 |
| H | -2.87359700 | 2.45465200  | 0.31985500  |
| H | -8.19452200 | -1.89073300 | 0.01962800  |
| H | -0.66121300 | 2.50494700  | 3.34166200  |
| H | -2.04444400 | -0.14240600 | -4.29175700 |
| H | 0.99338400  | 2.37400300  | -2.57433000 |
| H | 0.25129800  | -1.80679900 | 2.77905400  |
| H | -2.81162700 | -5.86374700 | -2.30029400 |
| H | -1.60255700 | -1.21941700 | 6.47884600  |
| H | -3.18017300 | -3.49186300 | -1.78188300 |
| H | -0.19887300 | -4.15749700 | -4.09307100 |
| H | -0.51023800 | 2.88332100  | 5.77671800  |
| H | 0.66614900  | -4.15224100 | 2.17916000  |
| H | -6.59476600 | -3.36777200 | 1.23292200  |
| H | -7.33650200 | -0.10805100 | -1.47630400 |
| H | -3.85316500 | -0.82086700 | 2.93036100  |
| H | -5.22074700 | 3.24672000  | 0.43962400  |
| H | -6.19944600 | -0.06973700 | 3.00230600  |
| H | -3.04119000 | 1.47240600  | -2.69756500 |
| H | -5.45110700 | 1.12590000  | -2.44830300 |
| H | -1.71751000 | 0.94838200  | -6.46682800 |
| H | -1.24629600 | -1.98559700 | -3.62965500 |
| H | 0.12280100  | -6.13276600 | 0.83542800  |
| H | -1.77577600 | -1.59672700 | 4.05211900  |
| H | 1.55174000  | -1.33406300 | -0.42226000 |
| H | -1.16048900 | -7.20017800 | -0.99800500 |
| H | -4.17732000 | -3.07525200 | 0.95958800  |
| H | 1.31026800  | 3.48055300  | -4.75114600 |
| H | 2.59290500  | -3.50561300 | -0.88462600 |
| H | -6.89487100 | 1.97868000  | 1.77324500  |
| H | -0.96651200 | 1.01773500  | 7.36012500  |
| H | 1.72716200  | -4.94115000 | -2.72790300 |
| H | -0.04248600 | 2.77189800  | -6.71943100 |
| C | 6.22170700  | -0.00577900 | 0.61238200  |
| C | 5.02522900  | 0.66367200  | 0.83903500  |
| C | 3.85207200  | -0.05504700 | 1.12398500  |
| C | 3.89229200  | -1.45997700 | 1.17102000  |
| C | 5.08520900  | -2.13844200 | 0.93703400  |
| C | 6.23606400  | -1.40198100 | 0.65702800  |
| H | 7.12791500  | 0.54828700  | 0.39599800  |

|    |             |             |            |
|----|-------------|-------------|------------|
| H  | 4.98902800  | 1.74644800  | 0.78697100 |
| H  | 2.98514400  | -2.01549400 | 1.38466500 |
| H  | 5.11487500  | -3.22149700 | 0.97075800 |
| C  | 2.60473100  | 0.61514500  | 1.37456600 |
| C  | 1.59849500  | 0.91251700  | 2.08887600 |
| H  | 1.32860500  | 0.98182600  | 3.13070700 |
| H  | -0.43109500 | 3.15529500  | 1.28495700 |
| Br | 7.87208000  | -2.32573500 | 0.32027800 |

### TS2-Br

|    |            |            |           |
|----|------------|------------|-----------|
| C  | 1.87976000 | 3.4566700  | 0.2117520 |
| C  | 2.04906000 | 4.7660070  | 1.0281020 |
| C  | 0.88732500 | 4.9797240  | 1.9604350 |
| C  | 0.06784200 | 3.9967750  | 2.3543860 |
| C  | 0.30463900 | 2.5822390  | 2.0052000 |
| C  | 1.24508300 | 2.2456880  | 0.8851850 |
| H  | 2.86521200 | 3.1753070  | -0.181577 |
| H  | 0.74881100 | 5.9986340  | 2.3168630 |
| H  | -0.7415690 | 4.1736660  | 3.0568070 |
| C  | 3.37905500 | 4.8793430  | 1.7583350 |
| H  | 4.20199600 | 4.7987170  | 1.0404480 |
| H  | 3.45606300 | 5.8409130  | 2.2763910 |
| H  | 3.47214300 | 4.0778030  | 2.4980710 |
| O  | 2.01516700 | 5.7904290  | 0.0098820 |
| C  | 1.01550900 | 5.4184000  | -0.945594 |
| H  | 0.03216900 | 5.8321790  | -0.670320 |
| O  | -0.1866880 | 1.7075080  | 2.7191990 |
| C  | 1.01280200 | 3.9135370  | -0.920756 |
| C  | 0.34272200 | 3.0107980  | -1.671882 |
| H  | 1.29701300 | 5.8361840  | -1.918441 |
| C  | -0.6000040 | 3.3819860  | -2.779312 |
| H  | -0.5100550 | 2.7067110  | -3.636598 |
| H  | -1.6400540 | 3.3259590  | -2.440372 |
| H  | -0.4155600 | 4.4049100  | -3.132038 |
| Rh | 0.36981400 | 1.1054130  | -0.694354 |
| P  | -1.9832900 | 1.1174170  | -0.070846 |
| P  | 0.44733600 | -1.3668060 | -0.162005 |
| C  | 0.47864500 | -2.1080420 | 1.5034610 |
| C  | 0.66002600 | -1.2824340 | 2.6183330 |
| C  | -3.2941040 | -3.1034550 | -2.424089 |

|   |            |            |           |   |            |            |           |
|---|------------|------------|-----------|---|------------|------------|-----------|
| C | -1.0381090 | -2.1301180 | -0.990590 | H | 0.71678100 | -0.2079450 | 2.4947260 |
| C | -3.2962990 | -4.2044080 | 4.1437700 | H | -3.4891660 | -4.9009980 | 4.9545400 |
| C | -2.9399470 | -1.9362690 | 3.3459170 | H | 1.44843800 | -1.1070690 | -2.890440 |
| C | 0.52735300 | -3.2130260 | 4.0717930 | H | -4.6014550 | 1.5949640  | 1.2848980 |
| C | -2.8708780 | 2.6286740  | 0.4872500 | H | -1.3222360 | 3.9570430  | -0.182659 |
| C | 2.10497900 | -1.8040000 | -2.382167 | H | 0.08326400 | -2.8910860 | -2.689888 |
| C | -4.1484860 | 2.5567100  | 1.0720770 | H | -6.8592140 | -2.7506870 | -0.898319 |
| C | 1.85554200 | -2.1575630 | -1.045034 | H | 4.53475000 | -4.2076370 | -0.567974 |
| C | -4.2680870 | 4.9728740  | 1.1612740 | H | -4.9165130 | -1.9539050 | 0.3720690 |
| C | -2.9012100 | 0.6840440  | -1.610211 | H | -6.0399740 | 0.3077680  | -2.879763 |
| C | -2.3082810 | 3.8877450  | 0.2508590 | H | 3.38062800 | -2.0329760 | -4.095827 |
| C | -2.4408920 | -0.1231610 | 1.2190130 | H | -1.8511920 | -3.7038520 | -3.918982 |
| C | -2.3080650 | -2.0333720 | -0.422192 | H | -3.2351710 | -5.7511810 | 2.6248700 |
| C | -0.8980510 | -2.7590190 | -2.258132 | H | -3.2919520 | -2.4706290 | 5.4092690 |
| C | -5.8621140 | -2.8493320 | -1.317516 | H | 0.15924500 | -4.1347040 | 0.8187450 |
| C | -3.4568000 | -2.515196  | -1.131113 | H | 0.79859900 | -1.1874030 | 4.7625210 |
| C | 3.85087200 | -3.5409230 | -1.085164 | H | 0.21606500 | -5.1097020 | 3.0895620 |
| C | -4.7729560 | -2.4049710 | -0.602301 | H | -2.5297090 | 1.3879320  | 2.7762200 |
| C | -4.9548760 | 0.3410880  | -2.856442 | H | -2.9512630 | -0.1741000 | 4.6010130 |
| C | 3.20500500 | -2.3199370 | -3.063138 | H | -5.8235500 | 3.6471130  | 1.8578970 |
| C | -1.9868220 | -3.2271990 | -2.951879 | H | -4.8883560 | 0.8673440  | -0.780130 |
| C | -3.1536590 | -4.6860100 | 2.8212390 | H | -4.2933820 | -3.9871990 | -4.124494 |
| C | -3.1870010 | -2.8560290 | 4.3986260 | H | 2.59239300 | -3.3020720 | 0.6327270 |
| C | 0.31919300 | -3.4921990 | 1.6788210 | H | -1.0852080 | 0.4327090  | -2.758170 |
| C | 0.68025900 | -1.8368420 | 3.8998400 | H | -6.5653120 | -3.7664430 | -3.154489 |
| C | 0.35073400 | -4.0403740 | 2.9584760 | H | -2.7699390 | -4.2075210 | 0.7804660 |
| C | -2.6077590 | 0.3338670  | 2.5577120 | H | -2.5420720 | 6.020478   | 0.4017960 |
| C | -2.8392220 | -0.5435040 | 3.5852940 | H | -2.2435700 | -0.1269050 | -4.858148 |
| C | -2.7853660 | -2.4181610 | 2.0086330 | H | 0.53512800 | -3.6421290 | 5.0695720 |
| C | -4.2193010 | 0.0561760  | -4.008604 | H | 4.95361400 | -3.5781460 | -2.937825 |
| C | -4.8391400 | 3.7201360  | 1.4048280 | H | -4.7309300 | -0.1950380 | -4.933054 |
| C | -4.3014460 | 0.6548600  | -1.665509 | H | -4.8081550 | 5.8778740  | 1.4242180 |
| C | -4.4362470 | -3.5479650 | -3.140872 | C | 5.07829300 | -0.5099150 | 0.6421520 |
| C | -2.5093120 | -1.4859170 | 0.9506530 | C | 3.82165300 | -0.0674860 | 0.2394000 |
| C | 4.08658300 | -3.1871890 | -2.413489 | C | 3.64416400 | 0.5794920  | -0.995068 |
| C | 2.74319000 | -3.0317630 | -0.404926 | C | 4.77337600 | 0.7849990  | -1.815420 |
| C | -2.1716210 | 0.4078880  | -2.776297 | C | 6.03281700 | 0.3495460  | -1.421903 |
| C | -5.6959780 | -3.4247390 | -2.600313 | C | 6.17224000 | -0.2994800 | -0.193771 |
| C | -2.8963080 | -3.8183290 | 1.7830750 | H | 5.19802100 | -1.0174670 | 1.5924410 |
| C | -3.0009650 | 5.0532340  | 0.5855760 | H | 2.97101600 | -0.2405410 | 0.8878720 |
| C | -2.8241630 | 0.0947340  | -3.967385 | H | 4.65303700 | 1.2911480  | -2.768082 |

|    |            |            |           |   |             |             |             |
|----|------------|------------|-----------|---|-------------|-------------|-------------|
| H  | 6.89228900 | 0.5103590  | -2.062803 | C | -5.25793700 | -0.57895200 | -1.13602300 |
| C  | 2.36529100 | 1.0851240  | -1.428600 | C | -5.86047400 | 1.64833300  | 1.73553000  |
| C  | 1.73705400 | 1.7666990  | -2.314438 | C | -0.53214300 | 1.02138500  | -3.27022000 |
| H  | 1.65094800 | 2.0251250  | -3.360407 | C | -0.86459200 | 1.68415600  | 4.02493100  |
| H  | 1.98512700 | 1.5450620  | 1.2716860 | C | -1.29369700 | 0.63175000  | -4.38473000 |
| Br | 7.89981500 | -0.9132280 | 0.3500280 | C | -1.21158400 | 0.42101000  | 3.51918300  |

**TS1-CI**

|    |             |             |             |   |             |             |             |
|----|-------------|-------------|-------------|---|-------------|-------------|-------------|
| C  | 1.58948800  | 3.51429900  | 0.53180900  | C | -2.46402800 | -0.20399800 | -1.45139400 |
| C  | 1.86651200  | 4.99021500  | 0.14461800  | C | -1.98494100 | -2.05536100 | 0.20334000  |
| C  | 0.98532000  | 5.44544400  | -0.98689300 | C | -0.32341000 | -2.26942700 | 1.98028600  |
| C  | -0.09564500 | 4.77841300  | -1.41369400 | C | -2.26736300 | -5.39633700 | -1.49041600 |
| C  | -0.59126000 | 3.54030900  | -0.78379900 | C | -1.77452000 | -3.43207200 | -0.13779900 |
| C  | 0.17097300  | 2.97387200  | 0.38908300  | C | -1.39212000 | -0.40446200 | 5.79385300  |
| H  | 1.92539200  | 3.36094200  | 1.56527100  | C | -2.47569800 | -4.06665300 | -1.19941400 |
| H  | 1.28861600  | 6.37152600  | -1.47189600 | C | 0.19089000  | -3.53569300 | -3.29489900 |
| H  | -0.69648700 | 5.14112900  | -2.24354600 | C | -0.77717400 | 1.89821900  | 5.40014500  |
| C  | 1.80428500  | 5.96271500  | 1.31367200  | C | -0.08822100 | -3.57905700 | 1.64330000  |
| H  | 2.51587700  | 5.65593100  | 2.08728700  | C | -6.21998100 | -2.59232900 | 0.56910300  |
| H  | 2.05364400  | 6.97831700  | 0.98893300  | C | -6.65315000 | -0.76463800 | -0.95101000 |
| H  | 0.79638700  | 5.97307400  | 1.74156300  | C | -4.14758700 | 0.07037200  | 2.38543700  |
| O  | 3.23062600  | 4.95889100  | -0.33409500 | C | -4.92108000 | 2.36085100  | 0.99186200  |
| C  | 3.40018700  | 3.75028500  | -1.08518100 | C | -5.47067300 | 0.49819600  | 2.43044000  |
| H  | 3.13767800  | 3.90575700  | -2.14357500 | C | -3.40026200 | 0.64712200  | -2.09957700 |
| O  | -1.64282900 | 3.05000700  | -1.19719000 | C | -4.75127600 | 0.46135100  | -1.95257800 |
| C  | 2.47867300  | 2.75786600  | -0.41999000 | C | -4.33545300 | -1.42929100 | -0.44831200 |
| C  | 2.27914000  | 1.44754300  | -0.66013300 | C | 1.27004400  | -3.97794100 | -2.52573300 |
| H  | 4.45662500  | 3.46581900  | -1.03710300 | C | -1.11598700 | 1.25778100  | -5.61793000 |
| C  | 3.03622000  | 0.68363100  | -1.70644300 | C | -0.39818100 | -2.29979600 | -3.03507500 |
| H  | 3.92648600  | 1.23335700  | -2.03736900 | C | -0.61587600 | -5.56714700 | 0.26684900  |
| H  | 3.36349100  | -0.29850700 | -1.35952300 | C | -2.92538400 | -1.21789900 | -0.60712000 |
| H  | 2.40436800  | 0.51184300  | -2.58482400 | C | -1.03576400 | 0.85144100  | 6.28839100  |
| Rh | 0.44201900  | 0.90555000  | 0.35808000  | C | -1.48599600 | -0.61979100 | 4.41756100  |
| P  | -0.66342300 | 0.16807700  | -1.64421300 | C | 1.16455500  | -1.93930000 | -1.23438000 |
| P  | -1.43729300 | 0.28507400  | 1.69901200  | C | -1.32872600 | -6.15619300 | -0.75324300 |
| C  | -3.20199000 | 0.78209300  | 1.62816100  | C | -4.86112100 | -2.43211600 | 0.41308400  |
| C  | -3.59293800 | 1.92878500  | 0.93325800  | C | 0.58302500  | 2.67746900  | -4.65719400 |
| C  | -0.82236100 | -4.20398300 | 0.60263700  | C | 1.75582200  | -3.17495500 | -1.49397300 |
| C  | -1.31144800 | -1.50400700 | 1.29425300  | H | -2.87230800 | 2.45464200  | 0.32024400  |
| C  | -7.12803600 | -1.75247500 | -0.11835200 | H | -8.19706300 | -1.88606800 | 0.01943500  |

|   |             |             |             |               |             |             |             |
|---|-------------|-------------|-------------|---------------|-------------|-------------|-------------|
| H | -0.65780200 | 2.50214200  | 3.34095200  | C             | 1.59967400  | 0.90891900  | 2.08710900  |
| H | -2.04470900 | -0.14385300 | -4.29239600 | H             | 1.32948900  | 0.97604900  | 3.12906200  |
| H | 0.99372900  | 2.37159800  | -2.57467200 | H             | -0.43180800 | 3.15334200  | 1.28436500  |
| H | 0.24843900  | -1.81066200 | 2.77884400  | Cl            | 7.75801700  | -2.22712400 | 0.35482500  |
| H | -2.81869000 | -5.86363700 | -2.30107600 |               |             |             |             |
| H | -1.60348300 | -1.22074300 | 6.47857800  | <b>TS2-CI</b> |             |             |             |
| H | -3.18472500 | -3.49145300 | -1.78238100 | C             | 1.87724900  | 3.47045100  | 0.25394400  |
| H | -0.20378900 | -4.16088400 | -4.09032400 | C             | 2.01314900  | 4.78095800  | 1.07473500  |
| H | -0.50535500 | 2.88036900  | 5.77597400  | C             | 0.82585600  | 4.98031000  | 1.97893400  |
| H | 0.66109200  | -4.15625100 | 2.17837500  | C             | 0.02019800  | 3.98396300  | 2.36808400  |
| H | -6.59851200 | -3.36440500 | 1.23275600  | C             | 0.30381000  | 2.57259200  | 2.04105500  |
| H | -7.33756800 | -0.10426600 | -1.47671000 | C             | 1.24418500  | 2.25233200  | 0.91766600  |
| H | -3.85405300 | -0.82115600 | 2.92950600  | H             | 2.87347700  | 3.19854300  | -0.11943500 |
| H | -5.21881600 | 3.24842600  | 0.44054400  | H             | 0.65944300  | 5.99964600  | 2.32193600  |
| H | -6.19975800 | -0.06829100 | 3.00202700  | H             | -0.80403600 | 4.14986900  | 3.05578700  |
| H | -3.04093600 | 1.47232300  | -2.69833500 | C             | 3.32328200  | 4.90652800  | 1.83828400  |
| H | -5.45112800 | 1.12785500  | -2.44905900 | H             | 4.16462800  | 4.83795600  | 1.14080100  |
| H | -1.71697500 | 0.94655100  | -6.46752300 | H             | 3.37654900  | 5.86676200  | 2.36179100  |
| H | -1.24982500 | -1.98815400 | -3.62756200 | H             | 3.40666200  | 4.10318300  | 2.57722500  |
| H | 0.11595800  | -6.13594400 | 0.83415400  | O             | 1.99430100  | 5.80602000  | 0.05695400  |
| H | -1.77818200 | -1.59782400 | 4.05192200  | C             | 1.02331500  | 5.42486300  | -0.92419300 |
| H | 1.55157400  | -1.33528300 | -0.42319900 | H             | 0.03050500  | 5.83397200  | -0.67756600 |
| H | -1.16858900 | -7.20185400 | -0.99928200 | O             | -0.14340800 | 1.69206500  | 2.77735200  |
| H | -4.18083800 | -3.07398300 | 0.95926100  | C             | 1.02957700  | 3.92042800  | -0.89590800 |
| H | 1.31145800  | 3.47777200  | -4.75158500 | C             | 0.37998900  | 3.01013900  | -1.65645500 |
| H | 2.59071300  | -3.50829500 | -0.88450200 | H             | 1.32848800  | 5.84125800  | -1.89061800 |
| H | -6.89377100 | 1.98115200  | 1.77387000  | C             | -0.55316800 | 3.36125500  | -2.77835400 |
| H | -0.96376800 | 1.01547600  | 7.35958700  | H             | -0.35650800 | 4.37222900  | -3.15833700 |
| H | 1.72273400  | -4.94460500 | -2.72588100 | H             | -0.46672800 | 2.66064500  | -3.61559700 |
| H | -0.04124100 | 2.76942900  | -6.72003000 | H             | -1.59509100 | 3.32578200  | -2.44190700 |
| C | 6.22892000  | 0.01142500  | 0.61959700  | Rh            | 0.38038100  | 1.11802100  | -0.67072700 |
| C | 5.02876600  | 0.67431200  | 0.84439500  | P             | -1.97865000 | 1.13514000  | -0.08395100 |
| C | 3.85794900  | -0.05066800 | 1.12373900  | P             | 0.42934200  | -1.37996200 | -0.17861900 |
| C | 3.90353500  | -1.45570300 | 1.16518600  | C             | 0.53067700  | -2.14500600 | 1.47247500  |
| C | 5.09943600  | -2.12883000 | 0.93248600  | C             | 0.65978700  | -1.32395200 | 2.59803300  |
| C | 6.24749600  | -1.38500200 | 0.65988200  | C             | -3.34636100 | -3.15789200 | -2.33748400 |
| H | 7.13614800  | 0.56636400  | 0.40834500  | C             | -1.06118500 | -2.18172300 | -0.95548200 |
| H | 4.98750900  | 1.75704400  | 0.79621600  | C             | -3.27059400 | -4.12193800 | 4.21680700  |
| H | 2.99768300  | -2.01498600 | 1.37421000  | C             | -2.92957100 | -1.86523300 | 3.38096600  |
| H | 5.13812400  | -3.21197400 | 0.96129700  | C             | 0.60124800  | -3.27579600 | 4.02782000  |
| C | 2.60811400  | 0.61396900  | 1.37488900  |               |             |             |             |



|   |             |             |             |   |             |             |             |
|---|-------------|-------------|-------------|---|-------------|-------------|-------------|
| C | -2.88065400 | 2.64596500  | 0.44367900  | H | -1.31852900 | 3.97295500  | -0.19620300 |
| C | 1.95494900  | -1.72836400 | -2.49650400 | H | 0.03686400  | -3.05954300 | -2.61349500 |
| C | -4.16705100 | 2.57279500  | 1.00852900  | H | -6.89846300 | -2.58727400 | -0.84636700 |
| C | 1.80963100  | -2.10658300 | -1.14963600 | H | 4.59590800  | -4.04561600 | -0.86966900 |
| C | -4.28899300 | 4.98866400  | 1.09380400  | H | -4.92605000 | -1.81958600 | 0.39951500  |
| C | -2.85084600 | 0.66906600  | -1.63748800 | H | -5.92776000 | 0.43499200  | -3.07917800 |
| C | -2.31321800 | 3.90467700  | 0.21731800  | H | 3.12587300  | -1.88959600 | -4.29091400 |
| C | -2.43800000 | -0.08684500 | 1.22228100  | H | -1.92357900 | -3.88911500 | -3.79326000 |
| C | -2.32409000 | -2.03329000 | -0.38553200 | H | -3.18258200 | -5.69537700 | 2.72673100  |
| C | -0.93993100 | -2.88288600 | -2.18715500 | H | -3.29140400 | -2.36609500 | 5.45124700  |
| C | -5.90492400 | -2.74643400 | -1.25529300 | H | 0.30811300  | -4.17569000 | 0.76043000  |
| C | -3.48894100 | -2.50577500 | -1.07299300 | H | 0.76958500  | -1.24815800 | 4.74463400  |
| C | 3.85304500  | -3.40317400 | -1.33330700 | H | 0.38761300  | -5.17366800 | 3.02183200  |
| C | -4.79996700 | -2.31919700 | -0.55371400 | H | -2.53508100 | 1.45089000  | 2.75370400  |
| C | -4.84662700 | 0.39059500  | -2.98772800 | H | -2.95757200 | -0.08055900 | 4.60388300  |
| C | 3.03021800  | -2.18998100 | -3.25145600 | H | -5.85585400 | 3.66328500  | 1.76535500  |
| C | -2.04341200 | -3.35672400 | -2.85352400 | H | -4.86373300 | 1.05815700  | -0.95067800 |
| C | -3.11393300 | -4.62598900 | 2.90414800  | H | -4.37678800 | -4.07645000 | -4.00016300 |
| C | -3.17642300 | -2.76819400 | 4.44820800  | H | 2.69142400  | -3.23909700 | 0.46283100  |
| C | 0.43141300  | -3.53683100 | 1.62942200  | H | -0.99873500 | 0.16289500  | -2.63236600 |
| C | 0.69201800  | -1.89203400 | 3.87319200  | H | -6.64036100 | -3.71411600 | -3.05329800 |
| C | 0.47396800  | -4.09768200 | 2.90359900  | H | -2.72762600 | -4.17952400 | 0.85614300  |
| C | -2.60600800 | 0.39241600  | 2.55349600  | H | -2.55052200 | 6.03745900  | 0.36504000  |
| C | -2.83896800 | -0.46763900 | 3.59551900  | H | -2.06537500 | -0.41891100 | -4.77376600 |
| C | -2.76568800 | -2.36944100 | 2.05293500  | H | 0.61671400  | -3.71553000 | 5.02087400  |
| C | -4.06802500 | -0.02362200 | -4.07000000 | H | 4.83642300  | -3.37089500 | -3.25148300 |
| C | -4.86399900 | 3.73599300  | 1.32882400  | H | -4.54157100 | -0.29930900 | -5.00765000 |
| C | -4.24310500 | 0.73950300  | -1.77951500 | H | -4.83357700 | 5.89361500  | 1.34743800  |
| C | -4.50394300 | -3.58756600 | -3.03798700 | C | 5.02995700  | -0.57050400 | 0.73706900  |
| C | -2.50255400 | -1.45355400 | 0.97727200  | C | 3.79176200  | -0.09615500 | 0.31482600  |
| C | 3.98863100  | -3.02345100 | -2.66832900 | C | 3.64213900  | 0.53034600  | -0.93378600 |
| C | 2.76909600  | -2.95008400 | -0.57834800 | C | 4.77970400  | 0.67049800  | -1.75573400 |
| C | -2.07723900 | 0.25644300  | -2.73270100 | C | 6.02129500  | 0.19884600  | -1.34694100 |
| C | -5.75900500 | -3.38561400 | -2.51019600 | C | 6.13252800  | -0.42003300 | -0.10048500 |
| C | -2.86170900 | -3.77438400 | 1.85151800  | H | 5.13037500  | -1.05836600 | 1.70022800  |
| C | -3.01207500 | 5.06982900  | 0.53990400  | H | 2.93180200  | -0.23001000 | 0.95957700  |
| C | -2.67872100 | -0.08743400 | -3.94111800 | H | 4.68044700  | 1.15438300  | -2.72216300 |
| H | 0.66920400  | -0.24573800 | 2.48753800  | H | 6.88963000  | 0.30661000  | -1.98746900 |
| H | -3.46248400 | -4.80584700 | 5.03854000  | C | 2.38248200  | 1.07429200  | -1.37911600 |
| H | 1.22855400  | -1.06870600 | -2.95832800 | C | 1.78524300  | 1.77395900  | -2.27260700 |
| H | -4.62103200 | 1.60929200  | 1.21327000  | H | 1.72260300  | 2.03492600  | -3.31965500 |

|              |            |             |            |   |           |            |           |
|--------------|------------|-------------|------------|---|-----------|------------|-----------|
| H            | 1.98648600 | 1.55325200  | 1.30076200 | C | 0.5028610 | -0.5143100 | -4.419307 |
| Cl           | 7.70114200 | -1.02691700 | 0.42034400 | C | 0.7793950 | -0.7458930 | 3.4875480 |
| <b>TS1-F</b> |            |             |            | C | -1.181224 | -1.5564880 | -5.811194 |
| C            | -3.058893  | -2.5071110  | 0.4631630  | C | 0.0467910 | 1.79114100 | -1.860082 |
| C            | -3.852753  | -3.7532970  | -0.006799  | C | -1.559161 | -1.2940020 | -3.437318 |
| C            | -3.213105  | -4.4038770  | -1.203043  | C | 1.9945770 | -0.3481940 | -1.526210 |
| C            | -1.972359  | -4.1341210  | -1.631256  | C | 2.2807420 | 1.45618700 | 0.2206080 |
| C            | -1.054829  | -3.2066750  | -0.942235  | C | 0.8944360 | 2.16594800 | 2.1007790 |
| C            | -1.542814  | -2.4946340  | 0.2949110  | C | 3.6868280 | 4.55034900 | -1.379523 |
| H            | -3.299868  | -2.3240910  | 1.5181180  | C | 2.5762450 | 2.83133600 | -0.059065 |
| H            | -3.8361110 | -5.1214600  | -1.733915  | C | 1.3538480 | -0.1791080 | 5.7769720 |
| H            | -1.555429  | -4.6214130  | -2.508714  | C | 3.4031100 | 3.22294800 | -1.147418 |
| C            | -4.122260  | -4.7704000  | 1.0930980  | C | 0.5723800 | 3.83540100 | -3.059445 |
| H            | -4.663011  | -4.2897610  | 1.9151960  | C | -0.074281 | -2.0760160 | 5.3353070 |
| H            | -4.724854  | -5.6025830  | 0.7144860  | C | 1.1553240 | 3.48680200 | 1.8344020 |
| H            | -3.177690  | -5.1714100  | 1.4750610  | C | 6.4399990 | 0.42186600 | 0.3535690 |
| O            | -5.124301  | -3.2029040  | -0.421802  | C | 6.1198600 | -1.3537530 | -1.253242 |
| C            | -4.866352  | -1.9556800  | -1.078520  | C | 3.6068160 | -1.3860380 | 2.2091990 |
| H            | -4.700630  | -2.1064590  | -2.157076  | C | 3.4691560 | -3.7337120 | 0.7080380 |
| O            | 0.0965400  | -3.0959780  | -1.365460  | C | 4.6963780 | -2.2502780 | 2.1687680 |
| C            | -3.637089  | -1.4124170  | -0.394184  | C | 2.5329770 | -1.4404940 | -2.260035 |
| C            | -2.986399  | -0.2422130  | -0.552082  | C | 3.8642160 | -1.7605610 | -2.183926 |
| H            | -5.749584  | -1.3191100  | -0.958102  | C | 4.2201640 | 0.06610200 | -0.587426 |
| C            | -3.438033  | 0.82353600  | -1.506726  | C | -0.198221 | 4.57560600 | -2.159479 |
| H            | -4.487498  | 0.68659700  | -1.797066  | C | 0.0691050 | -0.9494560 | -5.671096 |
| H            | -3.334706  | 1.82921000  | -1.094302  | C | 0.6951390 | 2.45477600 | -2.911634 |
| H            | -2.833247  | 0.79542400  | -2.420045  | C | 2.3191010 | 5.21593000 | 0.4994570 |
| Rh           | -1.057576  | -0.4663160  | 0.3989240  | C | 2.8229330 | 0.38242300 | -0.671217 |
| P            | 0.1760590  | -0.0382760  | -1.628495  | C | 0.5880900 | -1.2483960 | 6.2449250 |
| P            | 0.9695080  | -0.6013720  | 1.6626910  | C | 1.4555360 | 0.06872100 | 4.4068440 |
| C            | 2.4409170  | -1.6857230  | 1.4843310  | C | -0.721446 | 2.54520000 | -0.962798 |
| C            | 2.3752330  | -2.8638500  | 0.7364220  | C | 3.1425040 | 5.55860200 | -0.549446 |
| C            | 2.0190880  | 3.85589800  | 0.7715750  | C | 5.1087840 | 0.76621900 | 0.2750770 |
| C            | 1.4930820  | 1.13048600  | 1.3254750  | C | -1.993425 | -1.7289870 | -4.689937 |
| C            | 6.9545150  | -0.6478460  | -0.416661  | C | -0.846975 | 3.92533900 | -1.109664 |
| C            | 4.7447100  | -1.0181580  | -1.359574  | H | 1.4916410 | -3.0779710 | 0.1488020 |
| C            | 4.6290470  | -3.4295920  | 1.4191800  | H | 8.0051400 | -0.9123180 | -0.339893 |
| C            | -0.309837  | -0.6789510  | -3.284964  | H | -0.498771 | -2.4769770 | 3.2682920 |
| C            | 0.0209020  | -1.8268900  | 3.9663630  | H | 1.4865990 | -0.0684580 | -4.330329 |
|              |            |             |            | H | -2.193707 | -1.4395270 | -2.573953 |
|              |            |             |            | H | 0.2268480 | 1.90565400 | 2.9144970 |

|   |           |            |           |              |             |             |             |
|---|-----------|------------|-----------|--------------|-------------|-------------|-------------|
| H | 4.3247020 | 4.82720900 | -2.213795 |              |             |             |             |
| H | 1.8801330 | 0.46315700 | 6.4772550 | <b>TS2-F</b> |             |             |             |
| H | 3.8127040 | 2.46182000 | -1.800511 |              |             |             |             |
| H | 1.0908560 | 4.33545600 | -3.872240 | C            | 1.87694200  | 3.47101700  | 0.25797600  |
| H | -0.666087 | -2.9151510 | 5.6893630 | C            | 2.00714100  | 4.78100900  | 1.08054200  |
| H | 0.7034690 | 4.26746900 | 2.4404800 | C            | 0.81688300  | 4.97613700  | 1.98196800  |
| H | 7.0997310 | 0.97073600 | 1.0194050 | C            | 0.01437100  | 3.97665700  | 2.36943100  |
| H | 6.4968530 | -2.1850360 | -1.842910 | C            | 0.30648700  | 2.56641300  | 2.04433800  |
| H | 3.6676850 | -0.4736560 | 2.7932050 | C            | 1.24661300  | 2.25040200  | 0.92008800  |
| H | 3.4140110 | -4.6423620 | 0.1149680 | H            | 2.87454400  | 3.20249300  | -0.11390400 |
| H | 5.6008220 | -2.0010990 | 2.7156690 | H            | 0.64562000  | 5.99497000  | 2.32409900  |
| H | 1.8759960 | -2.0463190 | -2.868040 | H            | -0.81205300 | 4.13928100  | 3.05529700  |
| H | 4.2559580 | -2.6039170 | -2.745951 | C            | 3.31505300  | 4.90935400  | 1.84743600  |
| H | 0.7126950 | -0.8171450 | -6.535991 | H            | 4.15826700  | 4.84433400  | 1.15185800  |
| H | 1.3121610 | 1.90426700 | -3.611383 | H            | 3.36429400  | 5.86890700  | 2.37260900  |
| H | 1.8844530 | 5.98064400 | 1.1376030 | H            | 3.39902800  | 4.10507600  | 2.58530300  |
| H | 2.0683530 | 0.89383800 | 4.0614630 | O            | 1.98789500  | 5.80722500  | 0.06395500  |
| H | -1.219376 | 2.05779700 | -0.133381 | C            | 1.01931300  | 5.42474000  | -0.91912400 |
| H | 3.3701190 | 6.60191800 | -0.747646 | H            | 0.02532500  | 5.83166400  | -0.67364900 |
| H | 4.7299230 | 1.57753400 | 0.884296  | O            | -0.13352300 | 1.68458500  | 2.78360500  |
| H | -2.963845 | -2.2078130 | -4.784204 | C            | 1.02978600  | 3.92017200  | -0.89302900 |
| H | -1.444527 | 4.48888700 | -0.399147 | C            | 0.38501400  | 3.00956700  | -1.65704900 |
| H | 5.4808370 | -4.1031160 | 1.3896590 | H            | 1.32510100  | 5.84296800  | -1.88459200 |
| H | 0.5117670 | -1.4392350 | 7.3113980 | C            | -0.54713100 | 3.36034000  | -2.78004300 |
| H | -0.285588 | 5.65208200 | -2.273504 | H            | -0.35474300 | 4.37373100  | -3.15578100 |
| H | -1.516008 | -1.8968760 | -6.786865 | H            | -0.45486700 | 2.66336300  | -3.61970100 |
| C | -6.134240 | 2.42255000 | 1.0147950 | H            | -1.58977000 | 3.31832100  | -2.44656200 |
| C | -5.259036 | 1.35021900 | 1.1265760 | Rh           | 0.38448400  | 1.11755800  | -0.67071200 |
| C | -3.896857 | 1.57021100 | 1.4011220 | P            | -1.97688900 | 1.13585100  | -0.08796200 |
| C | -3.418575 | 2.88699700 | 1.5455020 | P            | 0.42967800  | -1.37966500 | -0.18182100 |
| C | -4.286482 | 3.96777600 | 1.4259350 | C            | 0.53593500  | -2.14984100 | 1.46682700  |
| C | -5.628082 | 3.71214000 | 1.1616100 | C            | 0.66369700  | -1.33168100 | 2.59460500  |
| H | -7.189492 | 2.27788800 | 0.8103990 | C            | -3.35259400 | -3.15924500 | -2.32945900 |
| H | -5.619133 | 0.33547900 | 0.9968780 | C            | -1.06323600 | -2.18201000 | -0.95465500 |
| H | -2.365945 | 3.05334200 | 1.7483990 | C            | -3.26491500 | -4.11158400 | 4.22628300  |
| H | -3.940813 | 4.99022700 | 1.5324040 | C            | -2.92505200 | -1.85667300 | 3.38508200  |
| C | -2.976546 | 0.47741200 | 1.5400880 | C            | 0.61042400  | -3.28758100 | 4.01906200  |
| C | -2.115542 | -0.2184540 | 2.1647360 | C            | -2.88111500 | 2.64637400  | 0.43739200  |
| H | -1.865577 | -0.4530560 | 3.1877240 | C            | 1.94236800  | -1.72563200 | -2.50818800 |
| H | -1.025071 | -2.9381730 | 1.1505540 | C            | -4.16794100 | 2.57277600  | 1.00121900  |
| F | -6.473336 | 4.75420600 | 1.0406090 | C            | 1.80513600  | -2.10499500 | -1.16080000 |

|   |             |             |             |   |             |             |             |
|---|-------------|-------------|-------------|---|-------------|-------------|-------------|
| C | -4.29087900 | 4.98860100  | 1.08627400  | H | -4.92443600 | -1.81618200 | 0.40970900  |
| C | -2.84913800 | 0.66629300  | -1.64068900 | H | -5.92510400 | 0.42597200  | -3.08347400 |
| C | -2.31389000 | 3.90527300  | 0.21171400  | H | 3.10042000  | -1.88799800 | -4.31079000 |
| C | -2.43556500 | -0.08313900 | 1.22163100  | H | -1.93377700 | -3.89383700 | -3.78740200 |
| C | -2.32459100 | -2.03271300 | -0.38172400 | H | -3.17622400 | -5.68854500 | 2.73993300  |
| C | -0.94562300 | -2.88558600 | -2.18532800 | H | -3.28635500 | -2.35288100 | 5.45662600  |
| C | -5.90821100 | -2.74352200 | -1.24188600 | H | 0.31704700  | -4.17898300 | 0.74928900  |
| C | -3.49151500 | -2.50544500 | -1.06547800 | H | 0.77433800  | -1.26154600 | 4.74136700  |
| C | 3.84331800  | -3.40735100 | -1.36004400 | H | 0.40051300  | -5.18312600 | 3.00789700  |
| C | -4.80111500 | -2.31692100 | -0.54328900 | H | -2.53226500 | 1.45814100  | 2.74958700  |
| C | -4.84393300 | 0.38337400  | -2.99153400 | H | -2.95333300 | -0.06897800 | 4.60357800  |
| C | 3.01111200  | -2.18924400 | -3.27100300 | H | -5.85779200 | 3.66267300  | 1.75666300  |
| C | -2.05100500 | -3.35994900 | -2.84817900 | H | -4.86297300 | 1.05263100  | -0.95506200 |
| C | -3.10818100 | -4.61869600 | 2.91479300  | H | -4.38792300 | -4.07855300 | -3.98868500 |
| C | -3.17136400 | -2.75724400 | 4.45448900  | H | 2.69458500  | -3.24170700 | 0.44433500  |
| C | 0.43965400  | -3.54230100 | 1.61999500  | H | -0.99569700 | 0.16332200  | -2.63401600 |
| C | 0.69781200  | -1.90320300 | 3.86819000  | H | -6.64889800 | -3.71224100 | -3.03719800 |
| C | 0.48433200  | -4.10659900 | 2.89260800  | H | -2.72259900 | -4.17670700 | 0.86559900  |
| C | -2.60259400 | 0.39913200  | 2.55191300  | H | -2.55207000 | 6.03801800  | 0.35922600  |
| C | -2.83498800 | -0.45848700 | 3.59611000  | H | -2.06061100 | -0.42303500 | -4.77579600 |
| C | -2.76136200 | -2.36395600 | 2.05823000  | H | 0.62741900  | -3.73005700 | 5.01087900  |
| C | -4.06421700 | -0.03048700 | -4.07315600 | H | 4.81267300  | -3.37709900 | -3.28548300 |
| C | -4.86562700 | 3.73570600  | 1.32087000  | H | -4.53695100 | -0.30760900 | -5.01080400 |
| C | -4.24146700 | 0.73429700  | -1.78335800 | H | -4.83600500 | 5.89336100  | 1.33945500  |
| C | -4.51228700 | -3.58841300 | -3.02678300 | C | 5.03151000  | -0.56648100 | 0.74636800  |
| C | -2.49988100 | -1.45041700 | 0.98022700  | C | 3.79231800  | -0.09780800 | 0.32051800  |
| C | 3.97065400  | -3.02685300 | -2.69563400 | C | 3.64436600  | 0.52680200  | -0.93038200 |
| C | 2.76619800  | -2.95149400 | -0.59693300 | C | 4.78289400  | 0.66790600  | -1.75256200 |
| C | -2.07445600 | 0.25392600  | -2.73524800 | C | 6.02550900  | 0.20233000  | -1.33947400 |
| C | -5.76591700 | -3.38425800 | -2.49642100 | C | 6.12640200  | -0.40880200 | -0.09305600 |
| C | -2.85668000 | -3.76941500 | 1.86011100  | H | 5.15094600  | -1.05461900 | 1.70763300  |
| C | -3.01346900 | 5.07021400  | 0.53357900  | H | 2.93018900  | -0.23211000 | 0.96211500  |
| C | -2.67487200 | -0.09198100 | -3.94363800 | H | 4.68167300  | 1.14985100  | -2.71973300 |
| H | 0.67120900  | -0.25310300 | 2.48713800  | H | 6.90613500  | 0.30452100  | -1.96467400 |
| H | -3.45638100 | -4.79364500 | 5.04965700  | C | 2.38513300  | 1.07218500  | -1.37730300 |
| H | 1.21458900  | -1.06347200 | -2.96412500 | C | 1.79175900  | 1.77487700  | -2.27156300 |
| H | -4.62148800 | 1.60907300  | 1.20606400  | H | 1.73729700  | 2.04520900  | -3.31654200 |
| H | -1.31870500 | 3.97364200  | -0.20047800 | H | 1.99052600  | 1.55191300  | 1.30085900  |
| H | 0.02991100  | -3.06337100 | -2.61400800 | F | 7.33318600  | -0.86275600 | 0.31354600  |
| H | -6.90062000 | -2.58272400 | -0.83085000 |   |             |             |             |
| H | 4.58672300  | -4.05357000 | -0.90250900 |   |             |             |             |

**TS1-CN**

|    |             |             |             |   |             |             |             |
|----|-------------|-------------|-------------|---|-------------|-------------|-------------|
| C  | -2.75765600 | -2.80718500 | 0.45426000  | C | -1.35164300 | -1.46839800 | -3.45254900 |
| C  | -3.43182700 | -4.12540700 | -0.00783900 | C | 2.09522100  | -0.22393500 | -1.52289700 |
| C  | -2.73708700 | -4.71789400 | -1.20323000 | C | 2.22009600  | 1.60013000  | 0.21827100  |
| C  | -1.52934500 | -4.33260400 | -1.63741700 | C | 0.74553400  | 2.19713500  | 2.06974200  |
| C  | -0.70179800 | -3.32019400 | -0.95499000 | C | 3.39228900  | 4.79406000  | -1.37271500 |
| C  | -1.25112900 | -2.65092200 | 0.28061000  | C | 2.40462600  | 2.99371000  | -0.06385600 |
| H  | -3.01375900 | -2.64254400 | 1.50868400  | C | 1.37029400  | -0.06309600 | 5.77049300  |
| H  | -3.29105000 | -5.49353400 | -1.72883500 | C | 3.21687800  | 3.44854100  | -1.13843600 |
| H  | -1.07041400 | -4.78163100 | -2.51425600 | C | 0.35139300  | 3.83514800  | -3.05444700 |
| C  | -3.60376500 | -5.15751900 | 1.09730900  | C | 0.16486800  | -2.10912200 | 5.33126400  |
| H  | -4.18908600 | -4.72612300 | 1.91610000  | C | 0.89691300  | 3.53418000  | 1.79855900  |
| H  | -4.12366500 | -6.04544900 | 0.72290700  | C | 6.44560300  | 0.89104800  | 0.40509100  |
| H  | -2.62563800 | -5.46438700 | 1.48200400  | C | 6.28292900  | -0.90608500 | -1.20230200 |
| O  | -4.74967300 | -3.69773900 | -0.42205000 | C | 3.75141700  | -1.14498200 | 2.23825900  |
| C  | -4.60791900 | -2.43948200 | -1.09224200 | C | 3.81336800  | -3.48102700 | 0.71288900  |
| H  | -4.42562600 | -2.58560000 | -2.16864000 | C | 4.90195000  | -1.92658300 | 2.20964100  |
| O  | 0.43365900  | -3.10454500 | -1.38066800 | C | 2.72534400  | -1.26795400 | -2.25398000 |
| C  | -3.43482700 | -1.77878800 | -0.41187300 | C | 4.07688200  | -1.48290400 | -2.16359200 |
| C  | -2.89232200 | -0.55792200 | -0.58283200 | C | 4.27252200  | 0.36465100  | -0.56363600 |
| H  | -5.54660000 | -1.88664800 | -0.98048500 | C | -0.51546300 | 4.49927500  | -2.18283600 |
| C  | -3.43134900 | 0.45948500  | -1.54463100 | C | 0.24538100  | -0.96504400 | -5.67890100 |
| H  | -4.46399000 | 0.23127100  | -1.83723900 | C | 0.59759200  | 2.47210300  | -2.89933800 |
| H  | -3.41603100 | 1.47357300  | -1.14079500 | C | 1.93490200  | 5.35004200  | 0.47449700  |
| H  | -2.82219800 | 0.47838300  | -2.45520000 | C | 2.85629000  | 0.57085400  | -0.66261500 |
| Rh | -0.95627500 | -0.58313600 | 0.37822900  | C | 0.72061000  | -1.20559600 | 6.24030200  |
| P  | 0.25850100  | -0.06044300 | -1.63573700 | C | 1.46047700  | 0.18362400  | 4.39912000  |
| P  | 1.07442200  | -0.55515000 | 1.65571100  | C | -0.88415200 | 2.42894300  | -0.99703400 |
| C  | 2.62450300  | -1.52234900 | 1.48853200  | C | 2.74731700  | 5.75629100  | -0.56030400 |
| C  | 2.65880300  | -2.69323500 | 0.72808900  | C | 5.09320200  | 1.13254200  | 0.30827100  |
| C  | 1.74638100  | 3.97075900  | 0.74975900  | C | -1.73963500 | -1.93576400 | -4.70865500 |
| C  | 1.44452200  | 1.21361300  | 1.31143400  | C | -1.13422500 | 3.79112900  | -1.15252400 |
| C  | 7.04972000  | -0.13777800 | -0.35583700 | H | 1.80351700  | -2.96374700 | 0.12242600  |
| C  | 4.88780700  | -0.67645500 | -1.32796600 | H | 8.11615200  | -0.32208300 | -0.26417200 |
| C  | 4.93453700  | -3.10018300 | 1.44848800  | H | -0.18598100 | -2.57269900 | 3.26380400  |
| C  | -0.16491200 | -0.74153900 | -3.29312900 | H | 1.57101100  | 0.03659800  | -4.32885200 |
| C  | 0.24902900  | -1.86268900 | 3.96135600  | H | -1.97435500 | -1.67671400 | -2.59337600 |
| C  | 0.63316900  | -0.49789400 | -4.42364900 | H | 0.08849600  | 1.88586900  | 2.87407900  |
| C  | 0.88841700  | -0.70779500 | 3.48058800  | H | 4.02178400  | 5.12025300  | -2.19544600 |
| C  | -0.94349800 | -1.68352300 | -5.82629000 | H | 1.81473100  | 0.63880300  | 6.47021300  |
| C  | -0.02172100 | 1.75050500  | -1.86858700 | H | 3.70292000  | 2.72176000  | -1.77794300 |
|    |             |             |             | H | 0.84848700  | 4.38207300  | -3.85014700 |

|   |             |             |             |    |             |             |             |
|---|-------------|-------------|-------------|----|-------------|-------------|-------------|
| H | -0.33532500 | -3.00529200 | 5.68677200  | C  | 3.22321500  | 2.33622900  | 0.32532900  |
| H | 0.36894000  | 4.27653200  | 2.39100500  | C  | 3.87293900  | 3.47740600  | 1.15147700  |
| H | 7.05305400  | 1.48965200  | 1.07769700  | C  | 2.87529300  | 4.11104900  | 2.08294800  |
| H | 6.73072500  | -1.70644900 | -1.78514800 | C  | 1.73079300  | 3.52244200  | 2.45381700  |
| H | 3.73205000  | -0.23924500 | 2.83502000  | C  | 1.38252000  | 2.14103200  | 2.06966300  |
| H | 3.83486000  | -4.38554700 | 0.11145100  | C  | 2.16509900  | 1.45983000  | 0.98209100  |
| H | 5.77552800  | -1.61871500 | 2.77647300  | H  | 4.02876500  | 1.69893600  | -0.06247300 |
| H | 2.12465400  | -1.92160100 | -2.87051000 | H  | 3.14088200  | 5.09750000  | 2.45843900  |
| H | 4.53951200  | -2.29189200 | -2.72225300 | H  | 1.04542300  | 3.99479900  | 3.15169500  |
| H | 0.87658700  | -0.76935400 | -6.54089100 | C  | 5.14166900  | 3.07093400  | 1.88681200  |
| H | 1.28885100  | 1.98189700  | -3.57406300 | H  | 5.87593500  | 2.68709800  | 1.17080400  |
| H | 1.42455700  | 6.07837600  | 1.09898000  | H  | 5.57622100  | 3.92714400  | 2.41298600  |
| H | 1.98376000  | 1.06807200  | 4.05384500  | H  | 4.91697000  | 2.28945700  | 2.61977000  |
| H | -1.36073600 | 1.89571600  | -0.18386300 | O  | 4.23638600  | 4.44334700  | 0.14021100  |
| H | 2.88994100  | 6.81415100  | -0.76074100 | C  | 3.17938000  | 4.48132900  | -0.82566200 |
| H | 4.64421600  | 1.91382900  | 0.90911800  | H  | 2.42119300  | 5.23303700  | -0.55325900 |
| H | -2.66176600 | -2.50111000 | -4.80818400 | O  | 0.52950300  | 1.54082400  | 2.72384500  |
| H | -1.80560700 | 4.29566600  | -0.46398200 | C  | 2.60737400  | 3.08947000  | -0.81210700 |
| H | 5.83352900  | -3.70965800 | 1.43001000  | C  | 1.65050000  | 2.50954500  | -1.57157400 |
| H | 0.65231500  | -1.39443100 | 7.30764100  | H  | 3.60738300  | 4.76742700  | -1.79247100 |
| H | -0.70035600 | 5.56261300  | -2.30344400 | C  | 0.92651800  | 3.20947000  | -2.68393300 |
| H | -1.24268600 | -2.04828400 | -6.80469500 | H  | 1.49287200  | 4.08096700  | -3.03696700 |
| C | -6.21458300 | 1.84577100  | 0.96231600  | H  | 0.75265700  | 2.54944600  | -3.53951800 |
| C | -5.25644800 | 0.84956400  | 1.07876300  | H  | -0.05600400 | 3.56056800  | -2.35104200 |
| C | -3.92134100 | 1.18422100  | 1.35896500  | Rh | 0.97923700  | 0.71342900  | -0.61757800 |
| C | -3.55197000 | 2.53266500  | 1.51263600  | P  | -1.23804000 | 1.57946400  | -0.08020900 |
| C | -4.50405200 | 3.53668300  | 1.38727800  | P  | 0.14614100  | -1.62470600 | -0.06657300 |
| C | -5.83747000 | 3.19284000  | 1.10989100  | C  | -0.19897500 | -2.28379600 | 1.59798700  |
| H | -7.24832600 | 1.59521900  | 0.75154500  | C  | 0.22195000  | -1.56751400 | 2.72353400  |
| H | -5.52843800 | -0.19143200 | 0.94540200  | C  | -3.81292100 | -1.91404700 | -2.59210700 |
| H | -2.51767900 | 2.78258300  | 1.72251200  | C  | -1.45745200 | -1.80965900 | -0.99922300 |
| H | -4.22534200 | 4.57856600  | 1.50002300  | C  | -4.63100700 | -2.91405300 | 3.93157600  |
| C | -2.90820700 | 0.16722600  | 1.50371100  | C  | -3.42666400 | -0.93009600 | 3.20938000  |
| C | -2.01888000 | -0.44291400 | 2.17027700  | C  | -0.69018000 | -3.28751600 | 4.16105200  |
| H | -1.74613600 | -0.67322100 | 3.18701800  | C  | -1.53022200 | 3.30576500  | 0.48534700  |
| H | -0.69017200 | -3.03636700 | 1.13693300  | C  | 1.67407100  | -2.70990500 | -2.16026800 |
| C | -6.82117500 | 4.22349400  | 0.97325300  | C  | -2.77321300 | 3.70244000  | 1.01201400  |
| N | -7.61955600 | 5.06182100  | 0.86236900  | C  | 1.22676300  | -2.89849400 | -0.84097700 |
|   |             |             |             | C  | -1.99334400 | 5.98633300  | 1.19787600  |
|   |             |             |             | C  | -2.17385900 | 1.51563600  | -1.66649700 |
|   |             |             |             | C  | -0.52831200 | 4.27005000  | 0.32784100  |

**TS2-CN**

|                  |             |             |             |   |             |             |             |
|------------------|-------------|-------------|-------------|---|-------------|-------------|-------------|
| C                | -2.17700600 | 0.58195200  | 1.15816000  | H | -5.14982700 | 2.35192700  | -3.09752300 |
| C                | -2.64038300 | -1.24839500 | -0.51659200 | H | 2.88857500  | -3.44939000 | -3.77087100 |
| C                | -1.47195500 | -2.46261100 | -2.26270600 | H | -2.59194400 | -3.01945700 | -3.99337400 |
| C                | -6.18179000 | -0.73502300 | -1.65304200 | H | -5.05239900 | -4.36943300 | 2.38016200  |
| C                | -3.83543900 | -1.28801700 | -1.30688100 | H | -4.06632400 | -1.30688900 | 5.23785200  |
| C                | 2.58329600  | -4.90960200 | -0.71605900 | H | -1.21202700 | -4.05830700 | 0.88977400  |
| C                | -5.05375900 | -0.70143400 | -0.86456100 | H | 0.28328600  | -1.49897400 | 4.87267500  |
| C                | -4.13826000 | 1.96527300  | -3.01797000 | H | -1.63700900 | -4.94746000 | 3.15736400  |
| C                | 2.55398700  | -3.61437100 | -2.75089200 | H | -1.78333700 | 2.00815300  | 2.74764300  |
| C                | -2.60790800 | -2.51132000 | -3.03297500 | H | -2.85797400 | 0.70393500  | 4.50804000  |
| C                | -4.59823500 | -3.40916400 | 2.60682600  | H | -3.96537400 | 5.31965200  | 1.77079100  |
| C                | -4.05213300 | -1.69988800 | 4.22480000  | H | -3.97572500 | 2.46706900  | -0.94200200 |
| C                | -0.87002000 | -3.50693100 | 1.75989500  | H | -4.95197100 | -2.40388400 | -4.36220000 |
| C                | -0.02751900 | -2.07000200 | 4.00240500  | H | 1.38669400  | -4.16979900 | 0.89945600  |
| C                | -1.10840600 | -4.00683900 | 3.03730500  | H | -0.54594400 | 0.55483600  | -2.71897200 |
| C                | -2.23659300 | 1.06080200  | 2.49848700  | H | -7.04944400 | -1.36607200 | -3.53953300 |
| C                | -2.83350000 | 0.32588900  | 3.48966600  | H | -3.95029200 | -3.09615500 | 0.60133800  |
| C                | -3.38179400 | -1.42995500 | 1.87045200  | H | 0.03808300  | 6.33150000  | 0.55957900  |
| C                | -3.51561000 | 1.39595200  | -4.13030100 | H | -1.72482900 | 0.44798300  | -4.87521000 |
| C                | -3.00073700 | 5.03141800  | 1.36335600  | H | -0.89016900 | -3.67377700 | 5.15632000  |
| C                | -3.47253500 | 2.02694200  | -1.79421500 | H | 3.71375100  | -5.41381700 | -2.48202900 |
| C                | -4.98987000 | -1.92776100 | -3.38616900 | H | -4.03996000 | 1.34155700  | -5.07972000 |
| C                | -2.72124100 | -0.66036200 | 0.85221800  | H | -2.17236900 | 7.02105600  | 1.47540200  |
| C                | 3.01641800  | -4.71607800 | -2.02784200 | C | 4.88450800  | -2.43358000 | 0.70470000  |
| C                | 1.69453400  | -4.00928600 | -0.12610000 | C | 3.84420000  | -1.60205300 | 0.31698800  |
| C                | -1.55238400 | 0.95722600  | -2.79361800 | C | 3.88990200  | -0.91674000 | -0.91071900 |
| C                | -6.15255400 | -1.35168000 | -2.92714900 | C | 5.02768000  | -1.07162600 | -1.73481900 |
| C                | -3.98268600 | -2.69166200 | 1.60512100  | C | 6.07346700  | -1.89541000 | -1.35282800 |
| C                | -0.75675100 | 5.60138700  | 0.68206600  | C | 6.00565400  | -2.58663500 | -0.12814700 |
| C                | -2.21706400 | 0.89528900  | -4.01659300 | H | 4.83474500  | -2.96801200 | 1.64705000  |
| H                | 0.68471600  | -0.59543100 | 2.60511600  | H | 2.98368600  | -1.49008300 | 0.96425100  |
| H                | -5.11089300 | -3.49487400 | 4.71393600  | H | 5.07548800  | -0.53592400 | -2.67722000 |
| H                | 1.35059900  | -1.84360500 | -2.72549600 | H | 6.94160000  | -2.01343800 | -1.99235600 |
| H                | -3.56130200 | 2.97413100  | 1.16683600  | C | 2.84588700  | -0.02277200 | -1.33554000 |
| H                | 0.43672500  | 3.98006600  | -0.05900700 | C | 2.46561900  | 0.82689000  | -2.21789800 |
| H                | -0.58011800 | -2.95043100 | -2.62807100 | H | 2.43629300  | 1.07827500  | -3.26902000 |
| H                | -7.10073800 | -0.27693400 | -1.29909400 | H | 2.57487400  | 0.53738900  | 1.39513100  |
| H                | 2.94151100  | -5.75941300 | -0.14235500 | C | 7.07415800  | -3.44870300 | 0.26667500  |
| H                | -5.08630900 | -0.21308500 | 0.10194500  | N | 7.94262700  | -4.15404500 | 0.58776400  |
| <b>TS1-COOMe</b> |             |             |             | C | 1.5243190   | 3.56229900  | 0.6171070   |
|                  |             |             |             | C | 1.7653140   | 5.05155100  | 0.2567480   |

|    |           |            |           |   |           |            |           |
|----|-----------|------------|-----------|---|-----------|------------|-----------|
| C  | 0.8898960 | 5.49853100 | -0.882553 | C | -0.246225 | -2.3065980 | 1.9494860 |
| C  | -0.166750 | 4.80965100 | -1.334898 | C | -2.024220 | -5.4114790 | -1.629705 |
| C  | -0.640191 | 3.55229100 | -0.727097 | C | -1.615547 | -3.4635240 | -0.226849 |
| C  | 0.1231730 | 2.98646700 | 0.4453230 | C | -1.441220 | -0.5226130 | 5.7750800 |
| H  | 1.8502310 | 3.40135200 | 1.6527180 | C | -2.274670 | -4.0939610 | -1.317452 |
| H  | 1.1766030 | 6.43844500 | -1.350759 | C | 0.3930640 | -3.4221790 | -3.383475 |
| H  | -0.764342 | 5.16790400 | -2.168981 | C | -0.886958 | 1.80217600 | 5.4237630 |
| C  | 1.6559150 | 6.00372400 | 1.4389970 | C | 0.0312250 | -3.6027840 | 1.5922490 |
| H  | 2.3634040 | 5.70570100 | 2.2197390 | C | -6.089048 | -2.7888690 | 0.4522560 |
| H  | 1.8813370 | 7.03078300 | 1.1334240 | C | -6.571153 | -0.9432810 | -1.030692 |
| H  | 0.6412330 | 5.97866800 | 1.8497670 | C | -4.143982 | -0.0830600 | 2.3346660 |
| O  | 3.1367000 | 5.06625400 | -0.199936 | C | -4.958271 | 2.21432900 | 0.9754170 |
| C  | 3.3521210 | 3.87575300 | -0.967826 | C | -5.478132 | 0.30995800 | 2.3695700 |
| H  | 3.1028410 | 4.04150100 | -2.027810 | C | -3.359445 | 0.60332000 | -2.118295 |
| O  | -1.676447 | 3.04365600 | -1.156820 | C | -4.704405 | 0.36789900 | -1.988298 |
| C  | 2.4472600 | 2.84742900 | -0.334540 | C | -4.236397 | -1.5414230 | -0.523037 |
| C  | 2.2845070 | 1.53821500 | -0.603876 | C | 1.4610750 | -3.8581610 | -2.595264 |
| H  | 4.4151540 | 3.62009200 | -0.905947 | C | -1.058940 | 1.36021900 | -5.603488 |
| C  | 3.0700790 | 0.81226000 | -1.655891 | C | -0.236210 | -2.2096000 | -3.107725 |
| H  | 3.9575550 | 1.38306600 | -1.957340 | C | -0.410990 | -5.5752130 | 0.1637290 |
| H  | 3.4052680 | -0.1742250 | -1.330028 | C | -2.832978 | -1.2785930 | -0.664374 |
| H  | 2.4542970 | 0.65535100 | -2.548456 | C | -1.133228 | 0.73663100 | 6.2929690 |
| Rh | 0.4501820 | 0.92706600 | 0.3811610 | C | -1.498977 | -0.7225380 | 4.3944550 |
| P  | -0.612406 | 0.20623500 | -1.648618 | C | 1.2638290 | -1.8600370 | -1.253936 |
| P  | -1.429125 | 0.22083700 | 1.6902080 | C | -1.083966 | -6.1615890 | -0.884615 |
| C  | -3.207253 | 0.66710100 | 1.6033180 | C | -4.735078 | -2.5803030 | 0.3113450 |
| C  | -3.618807 | 1.81727900 | 0.9262310 | C | 0.5962190 | 2.80294800 | -4.600673 |
| C  | -0.660310 | -4.2246890 | 0.5207320 | C | 1.8959180 | -3.0716070 | -1.528665 |
| C  | -1.237866 | -1.5551740 | 1.2543320 | H | -2.904224 | 2.37481100 | 0.3344060 |
| C  | -7.019332 | -1.9647160 | -0.22427  | H | -8.084366 | -2.1366830 | -0.098601 |
| C  | -5.181611 | -0.7072680 | -1.199677 | H | -0.742945 | 2.43735800 | 3.3760500 |
| C  | -5.888591 | 1.46328700 | 1.6918690 | H | -1.964784 | -0.0884570 | -4.311840 |
| C  | -0.492876 | 1.09711600 | -3.254511 | H | 0.9926220 | 2.47077700 | -2.518894 |
| C  | -0.938441 | 1.60394500 | 4.0444530 | H | 0.2921540 | -1.8495450 | 2.7719180 |
| C  | -1.234158 | 0.70876400 | -4.383164 | H | -2.543688 | -5.8764970 | -2.462413 |
| C  | -1.236073 | 0.33755200 | 3.5154220 | H | -1.643607 | -1.3534590 | 6.4448190 |
| C  | -0.142219 | 2.40825900 | -5.716848 | H | -2.984897 | -3.5252680 | -1.905488 |
| C  | 0.1940520 | -1.4106530 | -2.038578 | H | 0.0389900 | -4.0342650 | -4.207763 |
| C  | 0.4200310 | 2.15213400 | -3.379200 | H | -0.653472 | 2.78706400 | 5.8177260 |
| C  | -2.400304 | -0.2300020 | -1.480746 | H | 0.7813950 | -4.1718290 | 2.1348730 |
| C  | -1.873797 | -2.1017350 | 0.1390860 | H | -6.446652 | -3.5877960 | 1.0954010 |



|   |           |            |           | <b>TS2-COOMe</b> |           |            |           |
|---|-----------|------------|-----------|------------------|-----------|------------|-----------|
| H | -7.273047 | -0.2941240 | -1.547221 |                  |           |            |           |
| H | -3.834118 | -0.9756810 | 2.8675460 |                  |           |            |           |
| H | -5.271249 | 3.10517300 | 0.4379690 | C                | 2.2656230 | 3.15816900 | 0.2660340 |
| H | -6.199668 | -0.2856860 | 2.9207460 | C                | 2.6221170 | 4.40305100 | 1.1204770 |
| H | -3.023456 | 1.45411400 | -2.694342 | C                | 1.5319770 | 4.71556500 | 2.1103850 |
| H | -5.422647 | 1.02130200 | -2.475853 | C                | 0.6129310 | 3.82467000 | 2.5046410 |
| H | -1.643074 | 1.04929700 | -6.464852 | C                | 0.6481880 | 2.41062800 | 2.0846280 |
| H | -1.075265 | -1.9009470 | -3.718906 | C                | 1.5105610 | 2.00990300 | 0.9229210 |
| H | 0.3213070 | -6.1367650 | 0.7376220 | H                | 3.1942770 | 2.77059500 | -0.173850 |
| H | -1.755619 | -1.7034280 | 4.0104030 | H                | 1.5348550 | 5.72742300 | 2.5109970 |
| H | 1.6081380 | -1.2697900 | -0.414013 | H                | -0.140029 | 4.07072700 | 3.2477760 |
| H | -0.891420 | -7.1978930 | -1.146476 | C                | 3.9820010 | 4.32416000 | 1.7995760 |
| H | -4.038453 | -3.2112100 | 0.8495000 | H                | 4.7624090 | 4.17509300 | 1.0460630 |
| H | 1.3065290 | 3.62151600 | -4.673874 | H                | 4.1944560 | 5.24628600 | 2.3504540 |
| H | 2.7215040 | -3.3983660 | -0.903248 | H                | 4.0020200 | 3.48615800 | 2.5037380 |
| H | -6.930537 | 1.76879600 | 1.7228620 | O                | 2.6760750 | 5.46513700 | 0.1424570 |
| H | -1.089771 | 0.88887500 | 7.3674080 | C                | 1.6139020 | 5.25125300 | -0.794292 |
| H | 1.9445490 | -4.8070350 | -2.808210 | H                | 0.6951450 | 5.77012400 | -0.476175 |
| H | -0.008828 | 2.91520200 | -6.668191 | O                | 0.0560030 | 1.57287300 | 2.7658590 |
| C | 6.2189270 | 0.09242100 | 0.7160580 | C                | 1.4281390 | 3.75840500 | -0.820927 |
| C | 5.0142690 | 0.74986000 | 0.9188970 | C                | 0.6317530 | 2.96956600 | -1.578639 |
| C | 3.8465070 | 0.00987800 | 1.1712990 | H                | 1.9186970 | 5.66821100 | -1.760489 |
| C | 3.9029110 | -1.3952270 | 1.2082680 | C                | -0.303664 | 3.48240100 | -2.633977 |
| C | 5.1115090 | -2.0503740 | 0.9966710 | H                | 0.0064210 | 4.47186900 | -2.994286 |
| C | 6.2740840 | -1.3088850 | 0.7476340 | H                | -0.354995 | 2.80890800 | -3.495397 |
| H | 7.1288180 | 0.65014800 | 0.5245840 | H                | -1.321451 | 3.57186800 | -2.239359 |
| H | 4.9598870 | 1.83216900 | 0.8768980 | Rh               | 0.4589520 | 1.04648500 | -0.657708 |
| H | 2.9970630 | -1.9609330 | 1.3990010 | P                | -1.861164 | 1.30348300 | 0.0418360 |
| H | 5.1539360 | -3.1327090 | 1.0237610 | P                | 0.2637580 | -1.4465960 | -0.240123 |
| C | 2.5837060 | 0.66064400 | 1.4137090 | C                | 0.2415120 | -2.2693010 | 1.3860150 |
| C | 1.5760360 | 0.93255400 | 2.1349190 | C                | 0.5359730 | -1.5269550 | 2.5347530 |
| H | 1.2899730 | 0.98244500 | 3.1729860 | C                | -3.692525 | -2.6187220 | -2.498418 |
| H | -0.496239 | 3.12984500 | 1.3354950 | C                | -1.312554 | -1.9987410 | -1.067032 |
| C | 7.5937890 | -1.9607410 | 0.5088570 | C                | -3.723269 | -4.0676930 | 3.9766140 |
| O | 8.6220570 | -1.3504650 | 0.2754870 | C                | -3.106842 | -1.8144970 | 3.3047470 |
| O | 7.5242650 | -3.3001200 | 0.5806820 | C                | 0.2123540 | -3.5028010 | 3.8943820 |
| C | 8.7622910 | -4.0037380 | 0.3640770 | C                | -2.529436 | 2.87968900 | 0.7108590 |
| H | 9.5037350 | -3.7100950 | 1.1115410 | C                | 1.8063690 | -1.9642860 | -2.526048 |
| H | 8.5166630 | -5.0609500 | 0.4656380 | C                | -3.782105 | 2.93578300 | 1.3483420 |
| H | 9.1492690 | -3.7956100 | -0.636778 | C                | 1.5568220 | -2.3416550 | -1.194993 |
|   |           |            |           | C                | -3.587997 | 5.33844800 | 1.5678090 |

|   |           |            |           |   |           |            |           |
|---|-----------|------------|-----------|---|-----------|------------|-----------|
| C | -2.863918 | 1.07059800 | -1.486232 | H | -6.026775 | 1.28406200 | -2.731706 |
| C | -1.819804 | 4.06973300 | 0.5131880 | H | 3.0088850 | -2.2559830 | -4.282554 |
| C | -2.429255 | 0.05239100 | 1.2759770 | H | -2.356558 | -3.3497630 | -4.033751 |
| C | -2.553594 | -1.7640790 | -0.474501 | H | -3.874076 | -5.5153560 | 2.3689200 |
| C | -1.269605 | -2.5942260 | -2.358167 | H | -3.488275 | -2.4270530 | 5.3407760 |
| C | -6.192953 | -2.0704210 | -1.344584 | H | -0.318388 | -4.2084370 | 0.6095470 |
| C | -3.763075 | -2.0619330 | -1.183523 | H | 0.7265620 | -1.5596860 | 4.6772030 |
| C | 3.3977290 | -3.9185100 | -1.342565 | H | -0.331484 | -5.2997980 | 2.8287880 |
| C | -5.047339 | -1.7984550 | -0.631108 | H | -2.293059 | 1.46240500 | 2.9218420 |
| C | -4.953476 | 1.11951000 | -2.717332 | H | -2.875383 | -0.1456190 | 4.6616450 |
| C | 2.8313080 | -2.5623410 | -3.255795 | H | -5.271743 | 4.18138300 | 2.2664720 |
| C | -2.418100 | -2.8933980 | -3.049419 | H | -4.781033 | 1.60298300 | -0.636916 |
| C | -3.660733 | -4.4816520 | 2.6252850 | H | -4.816847 | -3.3025560 | -4.212611 |
| C | -3.447079 | -2.7601720 | 4.3072220 | H | 2.2131380 | -3.6202920 | 0.4179280 |
| C | -0.071571 | -3.6337100 | 1.4967670 | H | -1.138514 | 0.48058900 | -2.642747 |
| C | 0.5173990 | -2.1454900 | 3.7866430 | H | -7.029875 | -2.8231780 | -3.200207 |
| C | -0.079022 | -4.2469790 | 2.7468490 | H | -3.256432 | -3.9291680 | 0.6075550 |
| C | -2.509792 | 0.44231000 | 2.6436200 | H | -1.773792 | 6.20291300 | 0.7845230 |
| C | -2.829589 | -0.4619810 | 3.6231370 | H | -2.385337 | 0.19032800 | -4.747039 |
| C | -3.034417 | -2.2288480 | 1.9382050 | H | 0.1907230 | -3.9809690 | 4.8693660 |
| C | -4.289429 | 0.72309500 | -3.879779 | H | 4.4446040 | -3.9947990 | -3.226371 |
| C | -4.304702 | 4.15579400 | 1.7727480 | H | -4.843945 | 0.58093300 | -4.802635 |
| C | -4.246565 | 1.29589400 | -1.527957 | H | -3.996480 | 6.28767500 | 1.9021610 |
| C | -4.890597 | -2.8847930 | -3.212139 | C | 5.0052200 | -1.1210300 | 0.4552260 |
| C | -2.666437 | -1.2731810 | 0.9298870 | C | 3.7887400 | -0.5441020 | 0.1143920 |
| C | 3.6357280 | -3.5385460 | -2.663337 | C | 3.6444000 | 0.17238300 | -1.087518 |
| C | 2.3657500 | -3.3257990 | -0.612930 | C | 4.7684360 | 0.30743300 | -1.933600 |
| C | -2.206026 | 0.67933700 | -2.661127 | C | 5.9818760 | -0.2663550 | -1.589625 |
| C | -6.117348 | -2.6175000 | -2.648218 | C | 6.1124070 | -0.9891220 | -0.393195 |
| C | -3.317420 | -3.5893530 | 1.6338100 | H | 5.0960270 | -1.6796040 | 1.3793330 |
| C | -2.344515 | 5.29177600 | 0.9389950 | H | 2.9403870 | -0.6611960 | 0.7777410 |
| C | -2.910277 | 0.50622000 | -3.850346 | H | 4.6694880 | 0.86616700 | -2.858922 |
| H | 0.7153910 | -0.4608150 | 2.4610120 | H | 6.8430450 | -0.1680370 | -2.241601 |
| H | -3.986632 | -4.7838890 | 4.7495330 | C | 2.4124110 | 0.81581600 | -1.461654 |
| H | 1.2084600 | -1.1910160 | -2.994525 | C | 1.8134620 | 1.57690700 | -2.304367 |
| H | -4.346173 | 2.02748700 | 1.5289690 | H | 1.6956260 | 1.83928800 | -3.346874 |
| H | -0.849296 | 4.03988700 | 0.0409230 | H | 2.1712080 | 1.21177900 | 1.2614750 |
| H | -0.318759 | -2.8353460 | -2.810368 | C | 7.4301600 | -1.5984760 | -0.079859 |
| H | -7.163935 | -1.8563700 | -0.907512 | O | 8.4154960 | -1.5094470 | -0.793335 |
| H | 4.0213240 | -4.6716870 | -0.869789 | O | 7.4222090 | -2.2725690 | 1.0858470 |
| H | -5.119191 | -1.3661630 | 0.3598190 | C | 8.6636050 | -2.9002960 | 1.4527200 |

|                           |           |            |           |   |           |            |           |
|---------------------------|-----------|------------|-----------|---|-----------|------------|-----------|
| H                         | 8.4672790 | -3.4021670 | 2.4006380 | C | 0.7923100 | -1.6283100 | 4.0642610 |
| H                         | 8.9658050 | -3.6259960 | 0.6929820 | C | 1.2463380 | -0.8084220 | -4.367469 |
| H                         | 9.4510570 | -2.1516650 | 1.5744570 | C | 1.1668750 | -0.3836060 | 3.5322300 |
| <b>TS1-CF<sub>3</sub></b> |           |            |           | C | 0.0211450 | -2.4036110 | -5.714528 |
|                           |           |            |           | C | -0.029799 | 1.44629400 | -2.054915 |
|                           |           |            |           | C | -0.553274 | -2.0825200 | -3.387561 |
| C                         | -1.792125 | -3.4175960 | 0.5559200 | C | 2.4438330 | 0.05428100 | -1.453923 |
| C                         | -2.140073 | -4.8776340 | 0.1664620 | C | 2.0487930 | 1.97112900 | 0.1492200 |
| C                         | -1.278853 | -5.3732230 | -0.963193 | C | 0.4084810 | 2.31894600 | 1.9252300 |
| C                         | -0.157943 | -4.7654760 | -1.375296 | C | 2.5021120 | 5.24822200 | -1.629222 |
| C                         | 0.3993340 | -3.5599180 | -0.733703 | C | 1.9109600 | 3.34834700 | -0.225133 |
| C                         | -0.348176 | -2.9466750 | 0.4243620 | C | 1.3755300 | 0.48133100 | 5.7896730 |
| H                         | -2.128630 | -3.2485680 | 1.5866050 | C | 2.6351140 | 3.91551100 | -1.309261 |
| H                         | -1.629112 | -6.2782240 | -1.456257 | C | -0.053399 | 3.44712200 | -3.429661 |
| H                         | 0.4302430 | -5.1568080 | -2.201081 | C | 0.7042440 | -1.8129910 | 5.4435270 |
| C                         | -2.127190 | -5.8536260 | 1.3343940 | C | 0.2511330 | 3.63366900 | 1.5636420 |
| H                         | -2.823619 | -5.5128220 | 2.1075890 | C | 6.3045960 | 2.32329700 | 0.5046220 |
| H                         | -2.426362 | -6.8550760 | 1.0078060 | C | 6.6532140 | 0.43485400 | -0.961737 |
| H                         | -1.121503 | -5.9147660 | 1.7631090 | C | 4.1135500 | -0.1811900 | 2.3913350 |
| O                         | -3.500411 | -4.7788710 | -0.313133 | C | 4.7827010 | -2.5465060 | 1.0696040 |
| C                         | -3.610881 | -3.5625920 | -1.062661 | C | 5.4159290 | -0.6667390 | 2.4506700 |
| H                         | -3.360730 | -3.7299970 | -2.122231 | C | 3.3398610 | -0.8572480 | -2.075973 |
| O                         | 1.4861170 | -3.1330700 | -1.125985 | C | 4.6977470 | -0.7295940 | -1.931480 |
| C                         | -2.637304 | -2.6193000 | -0.400677 | C | 4.3682680 | 1.22021200 | -0.481952 |
| C                         | -2.367004 | -1.3221910 | -0.643192 | C | -1.073873 | 3.98863500 | -2.644008 |
| H                         | -4.651185 | -3.2240380 | -1.010228 | C | 1.0306800 | -1.4465340 | -5.588413 |
| C                         | -3.078342 | -0.5146010 | -1.688199 | C | 0.4661730 | 2.18741700 | -3.137397 |
| H                         | -4.015053 | -0.9952790 | -1.997585 | C | 0.8859750 | 5.55738500 | 0.1419730 |
| H                         | -3.317888 | 0.49582400 | -1.351889 | C | 2.9497790 | 1.06910800 | -0.637096 |
| H                         | -2.448558 | -0.4061380 | -2.578272 | C | 0.9904780 | -0.7552820 | 6.3101830 |
| Rh                        | -0.513609 | -0.8630030 | 0.3735590 | C | 1.4696930 | 0.66740000 | 4.4089750 |
| P                         | 0.6278860 | -0.2307540 | -1.644837 | C | -1.048467 | 2.00219000 | -1.270868 |
| P                         | 1.3955580 | -0.2967670 | 1.7093430 | C | 1.6207810 | 6.07971900 | -0.898626 |
| C                         | 3.1370040 | -0.8725600 | 1.6543650 | C | 4.9398120 | 2.22212100 | 0.3507300 |
| C                         | 3.4753950 | -2.0570510 | 0.9960270 | C | -0.768928 | -2.7209320 | -4.609379 |
| C                         | 1.0133100 | 4.19169400 | 0.5054260 | C | -1.570465 | 3.26142100 | -1.562441 |
| C                         | 1.3473730 | 1.48273900 | 1.2528660 | H | 2.7316640 | -2.5689980 | 0.3988080 |
| C                         | 7.1731390 | 1.42280500 | -0.156691 | H | 8.2471240 | 1.51024500 | -0.020594 |
| C                         | 5.2509370 | 0.30915400 | -1.143747 | H | 0.5672000 | -2.4560500 | 3.3977850 |
| C                         | 5.7533350 | -1.8541500 | 1.7918500 | H | 2.0498260 | -0.0855800 | -4.289484 |
| C                         | 0.4534050 | -1.1180580 | -3.249378 | H | -1.169548 | -2.3424570 | -2.538288 |

|   |           |            |           |                           |             |             |             |
|---|-----------|------------|-----------|---------------------------|-------------|-------------|-------------|
| H | -0.185002 | 1.91256600 | 2.7362260 | C                         | -7.402480   | 2.55823500  | 0.5075330   |
| H | 3.0695270 | 5.66291600 | -2.457203 | F                         | -7.153119   | 3.83497700  | 0.1448110   |
| H | 1.6101590 | 1.30536000 | 6.4573070 | F                         | -8.140047   | 2.60928700  | 1.6432960   |
| H | 3.3011090 | 3.28551100 | -1.886328 | F                         | -8.196184   | 2.01659200  | -0.443926   |
| H | 0.3497770 | 4.01249400 | -4.264686 |                           |             |             |             |
| H | 0.4111780 | -2.7810340 | 5.8393680 |                           |             |             |             |
| H | -0.457300 | 4.26576300 | 2.0921240 |                           |             |             |             |
| H | 6.7183310 | 3.09579400 | 1.1463760 |                           |             |             |             |
| H | 7.3060040 | -0.2715870 | -1.467387 |                           |             |             |             |
| H | 3.8603820 | 0.73919600 | 2.9069580 |                           |             |             |             |
| H | 5.0401510 | -3.4631280 | 0.5461990 |                           |             |             |             |
| H | 6.1702250 | -0.1165690 | 3.0052010 |                           |             |             |             |
| H | 2.9431970 | -1.6822970 | -2.650773 |                           |             |             |             |
| H | 5.3666460 | -1.4413510 | -2.407395 |                           |             |             |             |
| H | 1.6562690 | -1.1958510 | -6.440231 |                           |             |             |             |
| H | 1.2716140 | 1.79684800 | -3.746993 |                           |             |             |             |
| H | 0.1970620 | 6.18197200 | 0.704317  |                           |             |             |             |
| H | 1.7869300 | 1.62990800 | 4.0239590 |                           |             |             |             |
| H | -1.435814 | 1.46007400 | -0.417864 |                           |             |             |             |
| H | 1.5214220 | 7.12760600 | -1.166254 |                           |             |             |             |
| H | 4.2899970 | 2.91048800 | 0.8769320 |                           |             |             |             |
| H | -1.551758 | -3.4695040 | -4.691483 |                           |             |             |             |
| H | -2.357538 | 3.67403600 | -0.938238 |                           |             |             |             |
| H | 6.7707360 | -2.2315160 | 1.8414040 |                           |             |             |             |
| H | 0.9186390 | -0.8965140 | 7.3846030 |                           |             |             |             |
| H | -1.471591 | 4.97364200 | -2.869670 |                           |             |             |             |
| H | -0.143490 | -2.9008090 | -6.666132 |                           |             |             |             |
| C | -6.207591 | 0.36503600 | 0.6692250 |                           |             |             |             |
| C | -5.057739 | -0.3841330 | 0.8802600 |                           |             |             |             |
| C | -3.838148 | 0.26013700 | 1.1452400 |                           |             |             |             |
| C | -3.782644 | 1.66372900 | 1.1837950 |                           |             |             |             |
| C | -4.934355 | 2.41364900 | 0.9622980 |                           |             |             |             |
| C | -6.142240 | 1.76304700 | 0.7031500 |                           |             |             |             |
| H | -7.150726 | -0.1313330 | 0.4670300 |                           |             |             |             |
| H | -5.089404 | -1.4669660 | 0.8332840 |                           |             |             |             |
| H | -2.837075 | 2.15752800 | 1.3803650 |                           |             |             |             |
| H | -4.890459 | 3.49654000 | 0.9863000 |                           |             |             |             |
| C | -2.631639 | -0.4921420 | 1.3896010 |                           |             |             |             |
| C | -1.655851 | -0.8430800 | 2.1190190 |                           |             |             |             |
| H | -1.383853 | -0.9415580 | 3.1572400 |                           |             |             |             |
| H | 0.2366980 | -3.1418020 | 1.3278790 |                           |             |             |             |
|   |           |            |           | <b>TS2-CF<sub>3</sub></b> |             |             |             |
|   |           |            |           | C                         | 1.86000600  | 3.51662900  | 0.36518000  |
|   |           |            |           | C                         | 1.90279300  | 4.81889800  | 1.21033800  |
|   |           |            |           | C                         | 0.64961800  | 4.96761200  | 2.03440500  |
|   |           |            |           | C                         | -0.12608300 | 3.93413800  | 2.38680600  |
|   |           |            |           | C                         | 0.26348200  | 2.54032600  | 2.09347700  |
|   |           |            |           | C                         | 1.23557000  | 2.27168600  | 0.98671300  |
|   |           |            |           | H                         | 2.88411100  | 3.28372800  | 0.04304800  |
|   |           |            |           | H                         | 0.41286300  | 5.98024600  | 2.35522500  |
|   |           |            |           | H                         | -0.99420600 | 4.06221900  | 3.02680200  |
|   |           |            |           | C                         | 3.15287500  | 4.96973600  | 2.06487400  |
|   |           |            |           | H                         | 4.04188700  | 4.94025400  | 1.42611200  |
|   |           |            |           | H                         | 3.13976500  | 5.92098800  | 2.60688000  |
|   |           |            |           | H                         | 3.21078500  | 4.15560600  | 2.79434600  |
|   |           |            |           | O                         | 1.92586400  | 5.85668800  | 0.20671300  |
|   |           |            |           | C                         | 1.03442600  | 5.46538900  | -0.84316300 |
|   |           |            |           | H                         | 0.02093100  | 5.86036400  | -0.66976500 |
|   |           |            |           | O                         | -0.12099000 | 1.63927300  | 2.84011200  |
|   |           |            |           | C                         | 1.05857800  | 3.96020800  | -0.81966900 |
|   |           |            |           | C                         | 0.44203400  | 3.04851600  | -1.60406600 |
|   |           |            |           | H                         | 1.40353500  | 5.88844200  | -1.78416600 |
|   |           |            |           | C                         | -0.44792900 | 3.38956700  | -2.76321900 |
|   |           |            |           | H                         | -0.29429400 | 4.42472300  | -3.09417000 |
|   |           |            |           | H                         | -0.27057300 | 2.72979400  | -3.61974600 |
|   |           |            |           | H                         | -1.50259200 | 3.27597300  | -2.49097500 |
|   |           |            |           | Rh                        | 0.40660400  | 1.15388400  | -0.62923100 |
|   |           |            |           | P                         | -1.98900500 | 1.16743200  | -0.14347800 |
|   |           |            |           | P                         | 0.43450000  | -1.35611900 | -0.20189900 |
|   |           |            |           | C                         | 0.61894000  | -2.17419900 | 1.41627100  |
|   |           |            |           | C                         | 0.73745500  | -1.38951900 | 2.56871900  |
|   |           |            |           | C                         | -3.38815200 | -3.17257300 | -2.23938500 |
|   |           |            |           | C                         | -1.07054500 | -2.17213300 | -0.93283600 |
|   |           |            |           | C                         | -3.14850800 | -3.94786400 | 4.35484100  |
|   |           |            |           | C                         | -2.89258400 | -1.71575800 | 3.42780700  |
|   |           |            |           | C                         | 0.81281600  | -3.39386000 | 3.92340100  |

|   |             |             |             |   |             |             |             |
|---|-------------|-------------|-------------|---|-------------|-------------|-------------|
| C | -2.93312200 | 2.67396500  | 0.31916500  | H | -1.35345700 | 4.01724400  | -0.23976200 |
| C | 1.82635800  | -1.61913200 | -2.61282600 | H | -0.01146300 | -3.09501300 | -2.59209700 |
| C | -4.24201900 | 2.58683700  | 0.82779100  | H | -6.90453100 | -2.53860500 | -0.68942000 |
| C | 1.77551000  | -2.02668800 | -1.26730900 | H | 4.63862700  | -3.87033600 | -1.19530300 |
| C | -4.38961500 | 5.00093800  | 0.91463500  | H | -4.90024000 | -1.77733700 | 0.50802700  |
| C | -2.79740700 | 0.64147700  | -1.71172200 | H | -5.82544100 | 0.23572000  | -3.21820800 |
| C | -2.36663300 | 3.93809600  | 0.12387000  | H | 2.87412900  | -1.73074100 | -4.48557000 |
| C | -2.44726000 | -0.01305100 | 1.19934100  | H | -2.00109300 | -3.94602400 | -3.70758100 |
| C | -2.31786300 | -2.01196800 | -0.33583500 | H | -2.98623800 | -5.57735400 | 2.93260000  |
| C | -0.97788500 | -2.90695000 | -2.14746900 | H | -3.24863000 | -2.14499200 | 5.51550200  |
| C | -5.92095200 | -2.71426200 | -1.11540100 | H | 0.46614400  | -4.18463800 | 0.63267900  |
| C | -3.49955400 | -2.49673600 | -0.98432500 | H | 0.90289100  | -1.38880700 | 4.71345500  |
| C | 3.83770100  | -3.26232200 | -1.60504500 | H | 0.66041600  | -5.26170200 | 2.85164100  |
| C | -4.79778800 | -2.29039500 | -0.44091000 | H | -2.61101700 | 1.58349500  | 2.66396700  |
| C | -4.74579600 | 0.25377000  | -3.10428800 | H | -3.00003000 | 0.11659800  | 4.57324500  |
| C | 2.85568900  | -2.04796700 | -3.44686200 | H | -5.97151900 | 3.65945200  | 1.51551300  |
| C | -2.09740900 | -3.39259100 | -2.77734500 | H | -4.84361900 | 0.90552000  | -1.06537600 |
| C | -2.96361400 | -4.49953700 | 3.06482800  | H | -4.46087200 | -4.10640900 | -3.86646300 |
| C | -3.11163700 | -2.58305300 | 4.53037900  | H | 2.78950700  | -3.15909900 | 0.26413200  |
| C | 0.58473200  | -3.57386300 | 1.52243700  | H | -0.89493300 | 0.26357600  | -2.67592300 |
| C | 0.83093500  | -2.00240900 | 3.81997400  | H | -6.70156300 | -3.69889100 | -2.88489900 |
| C | 0.69072100  | -4.17897200 | 2.77257400  | H | -2.58847000 | -4.12142900 | 0.99972100  |
| C | -2.64061500 | 0.51531800  | 2.50834900  | H | -2.63004900 | 6.06830500  | 0.26877700  |
| C | -2.85762500 | -0.30793400 | 3.58317500  | H | -1.88553800 | -0.38362200 | -4.83517800 |
| C | -2.70247100 | -2.26839600 | 2.12247700  | H | 0.88004700  | -3.86873700 | 4.89794300  |
| C | -3.92155000 | -0.10936900 | -4.17129800 | H | 4.68603800  | -3.18256200 | -3.58507500 |
| C | -4.96307500 | 3.74228000  | 1.12076600  | H | -4.35843900 | -0.40619200 | -5.12024800 |
| C | -4.18866600 | 0.63055600  | -1.88286900 | H | -4.95248200 | 5.90007700  | 1.14825900  |
| C | -4.56367900 | -3.60016600 | -2.91044000 | C | 4.93761800  | -0.78384100 | 0.82606800  |
| C | -2.47323200 | -1.38945500 | 1.01017300  | C | 3.76203400  | -0.14909400 | 0.44473800  |
| C | 3.87019700  | -2.86593300 | -2.94177800 | C | 3.64520300  | 0.44730600  | -0.82236900 |
| C | 2.79162500  | -2.85305700 | -0.77487600 | C | 4.75543500  | 0.41541100  | -1.69032500 |
| C | -1.97743000 | 0.27830300  | -2.79117300 | C | 5.92805400  | -0.22638100 | -1.31475100 |
| C | -5.80627800 | -3.37332900 | -2.36323900 | C | 6.01700200  | -0.83388900 | -0.05782200 |
| C | -2.74316300 | -3.68287100 | 1.97803800  | H | 5.00518900  | -1.25764800 | 1.79933400  |
| C | -3.09009900 | 5.09575800  | 0.41856700  | H | 2.91743200  | -0.14920200 | 1.12195300  |
| C | -2.53400700 | -0.09453900 | -4.01332100 | H | 4.67910100  | 0.87842600  | -2.66861400 |
| H | 0.69963500  | -0.30784100 | 2.49777800  | H | 6.76777500  | -0.26562800 | -2.00026200 |
| H | -3.31673700 | -4.60462400 | 5.20348500  | C | 2.42681000  | 1.08809300  | -1.25789900 |
| H | 1.05892300  | -0.96505900 | -3.01302600 | C | 1.88026900  | 1.81031300  | -2.16481600 |
| H | -4.69256600 | 1.61813300  | 1.01539900  | H | 1.87415600  | 2.09850000  | -3.20644600 |

|   |            |             |             |
|---|------------|-------------|-------------|
| H | 1.98447100 | 1.58252500  | 1.37168900  |
| C | 7.22973100 | -1.63877500 | 0.29644900  |
| F | 7.09301900 | -2.93559400 | -0.09117500 |
| F | 7.46362100 | -1.66016800 | 1.62777000  |
| F | 8.35045500 | -1.17639000 | -0.30166600 |
